# Supplementary material for: The chiral crown conformation in paddlewheel complexes
Source: Royal Society of Chemistry journal article supplement (doi:10.1039/c001557a), 2010-01-01
Supplement: c001557a.pdf [file c001557a.pdf]

## Supporting Information

### The chiral crown conformation in chiral paddlewheel complexes

Andrew DeAngelis, David T. Boruta, Jean-Bernard Lubin, James N. Plampin, III, Glenn P. A.

Yap, and Joseph M. Fox\*

Brown Laboratories, Department of Chemistry and Biochemistry, University of Delaware,

Newark, DE 19716

| <b>Experimental Section</b>                                                     | <b>Page</b> |
|---------------------------------------------------------------------------------|-------------|
| General Considerations                                                          | S-2         |
| Experimental Procedures                                                         | S-4         |
| $^1\text{H}$ and $^{13}\text{C}$ -NMR spectra of $\text{Cu}_2(\text{S-PTTL})_4$ | S-6         |
| References                                                                      | S-6         |
| Crystal data and structure refinements                                          | S-7         |

## General Considerations

All reactions were carried out in glassware that was flame-dried under vacuum and cooled under nitrogen. Toluene was dried with a column packed with activated neutral alumina.

Chromatography was performed on silica gel (silicycle 40-63D, 60Å). For  $^{13}\text{C}$  NMR, multiplicities were distinguished using an ATP pulse sequence: typical methylene and quaternary carbons appear 'up' (u); methine and methyl carbons appear 'down' (dn). Reagents were used directly as purchased from commercial sources without further purification. *N*-Phthaloyl (*S*)-*tert*-leucinate,<sup>1</sup> dirhodium tetrakis *N*-phthaloyl (*S*)-*tert*-leucinate ( $\text{Rh}_2(\text{S-PTTL})_4$ ),<sup>1</sup> and dirhodium tetrakis *N*-1,8-naphthoyl (*S*)-*tert*-leucinate ( $\text{Rh}_2(\text{S-NTTL})_4$ ),<sup>2</sup> were prepared according to methods described in the literature.

X-ray structural analysis for compounds **2**, **3**, **4** and **5** (datasets **joef097f**, **joef094a**, **joef099** and **joef086**): Crystals were selected and mounted on plastic mesh using Paratone® oil flash-cooled to the data collection temperature. Data were collected on a Brüker-AXS APEX CCD diffractometer with graphite-monochromated Mo-K $\alpha$  radiation ( $\lambda=0.71073$  Å). Unit cell parameters were obtained from 60 data frames,  $0.3^\circ$   $\omega$ , from three different sections of the Ewald sphere. The systematic absences in the data and the unit cell parameters were consistent for  $P2_1$  and  $P2_1/m$  for **4** and, uniquely, to the reported space groups for **2**, **3** and **5**. The acentric space group is consistent with the chirally resolved **4**. The data-sets were treated with SADABS absorption corrections based on redundant multiscan data (Sheldrick, G.M. 2008. Acta Cryst. A64, 112-122). The structures were solved using direct methods and refined with full-matrix, least-squares procedures on  $F^2$ . The absolute structure parameters refined to virtually nil indicating the true hand of the data-sets was established which were confirmed by chiral centers with absolute chirality known from the

synthetic method. Compound **2** has two severely disordered, cocrystallized, acetonitrile solvent molecules per compound molecule which were treated as diffused contributions (Squeeze/Platon: Spek, A. L. 2003, *J. Appl. Cryst.* 36, 7-13). A severely disordered ethanol coordinated to a copper atom in **2** was treated as a rigid group, modeled on a similar ethanol ligand on an ordered, good quality, dicopper structure (Agterberg, F. P. W. et al. 1998, *Inorg. Chim. Acta* 267, 183), in two positions with refined 60/40 site occupancy. Compound **3** has a severely disordered thf molecule coordinated to copper in two positions with a refined site occupancy of 51/49 with chemically equivalent bonds and atomic displacement parameters constrained to be similar between disordered contributions. A cocrystallized ethyl acetate solvent molecule was located in **3**. A void of 157 Å<sup>3</sup> in **3** was observed but without any significant electron density that could be assigned as a chemically reasonable solvent molecule. Three disordered acetonitrile molecules per compound molecule were located in **4** constrained to have similar 1,2 and 1,3 atomic distances. Three toluene molecules per monomer are found cocrystallized in **5**. Alerts in checkCIF (<http://checkcif.iucr.org>) arise from the Squeeze procedure in **2**, a small void in **3**, and unresolvable, minor disorder, mostly in solvent molecules, resulting in Hirshfeld test failures. A peak remaining in the final difference map of **4** is located less than 1 Å from a Rh atom and was ignored as an artifact. All non-hydrogen atoms were refined with anisotropic displacement parameters. All hydrogen atoms were treated as idealized contributions. Atomic scattering factors and anomalous absorption coefficients are contained in the SHELXTL 6.12 program library (Sheldrick, G. M., *op. cit.*). The structures are filed with the CCDC under depositary numbers 761719 – 761721, and 770533.

## Experimental Procedures

### Copper(II) tetrakis *N*-phthaloyl-(*S*)-*tert*-leucinate $\text{Cu}_2(\text{S-PTTL})_4$

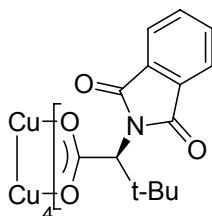

In a dry, 25 mL round-bottomed flask, copper(II) acetate (50 mg, 0.13 mmol) and *N*-phthaloyl-(*S*)-*tert*-leucine<sup>1</sup> (164 mg, 0.630 mmol) were dissolved in chlorobenzene (6.3 mL). The flask was fitted with a 10 mL addition funnel that was plugged with glass wool and filled with  $\text{Na}_2\text{CO}_3$ . The top of the addition funnel was fitted with a reflux condenser, and the top of the reflux condenser was fitted with a gas inlet adapter. The solution was heated to reflux in an oil bath at 165°C under nitrogen atmosphere, with acetic acid being removed from the condensate by the  $\text{Na}_2\text{CO}_3$ . After refluxing for 20 hours, the condenser and reflux condenser were removed, and replaced by a short path distillation apparatus. The chlorobenzene was removed by distillation at atmospheric pressure. The residue was dissolved in  $\text{CH}_2\text{Cl}_2$  and washed twice with water, dried over anhydrous  $\text{MgSO}_4$ , filtered, concentrated, and quickly chromatographed on silica gel (30-40% ethyl acetate in hexane) to give 86 mg (0.074 mmol, 57%) of a blue solid. The complex was only moderately stable in solution at ambient temperature, and broad spectral features were observed in the  $^1\text{H}$  NMR spectrum.

Spectral properties of the chromatographed material:  $[\alpha]_D^{20} = 880^\circ$  (*c.* 0.28,  $\text{CH}_2\text{Cl}_2$ );  $^1\text{H-NMR}$  (400 MHz,  $\text{CDCl}_3$ ,  $\delta$ ): 7.64 (broad m, 16H), 4.64 (broad m, 4H), 2.18-0.73 (broad m, 36H). A peak was observed at 2.46 ppm was attributed to an impurity. IR (neat,  $\text{cm}^{-1}$ ): 2963, 1777, 1718, 1643, 1468, 1385, 1266, 1108, 902, 739, 720; HRMS-ESI  $m/z$ :  $[\text{M}+\text{H}]$ , calc'd for

$\text{Cu}_2\text{C}_{56}\text{H}_{57}\text{N}_4\text{O}_{16}$ , 1167.2362; found 1167.2380. X-ray quality crystals of  $\text{Cu}_2(\text{S-PTTL})_4$  were grown as follows: the blue complex was dissolved in acetonitrile (~1 mL), which was then filtered through celite into a small tube (10 cm tall, 5 mm I.D.). This tube was then placed in a larger test tube (15 cm tall, 18 mm I.D.) that was filled with ~15 mL of 1:1 ethanol/water. The larger test tube was capped with a septum and sealed with parafilm. Crystals formed upon slow diffusion.

**$[\text{Rh}_2(\text{S-PTTL})_4(\text{NCC}_6\text{H}_4\text{CN})]_n$**

12 mg (0.010 mmol) of  $\text{Rh}_2(\text{S-PTTL})_4$  and 26 mg (0.020 mmol) of 1,4-dicyanobenzene were dissolved in 2 mL 1:1 toluene:hexanes. X-ray quality crystals were grown by slow diffusion of the resulting solution into hexanes.

**$\text{Rh}_2(\text{S-NTTL})_4(\text{EtOAc})(\text{C}_4\text{H}_8\text{O})$**

X-ray quality crystals of  $\text{Rh}_2(\text{S-NTTL})_4$  were grown by slow evaporation of a solution of in 18:1:1 toluene:EtOAc:THF.

**$\text{Rh}_2(\text{S-PTPA})_4(\text{MeCN})_2$**

X-ray quality crystals of  $\text{Rh}_2(\text{S-PTPA})_4(\text{MeCN})_2$  were grown as follows: the complex was dissolved in acetonitrile (~1 mL), which was then filtered through celite into a small tube (10 cm tall, 5 mm I.D.). This tube was then placed in a larger test tube (15 cm tall, 18 mm I.D.) that was filled with ~15 mL of 1:1 ethanol/water. The larger test tube was capped with a septum and sealed with parafilm. Crystals formed upon slow diffusion.

$^1\text{H-NMR}$  spectrum of  $\text{Cu}_2(\text{S-PTTL})_4$  (400 MHz,  $\text{CD}_3\text{CN}$ )

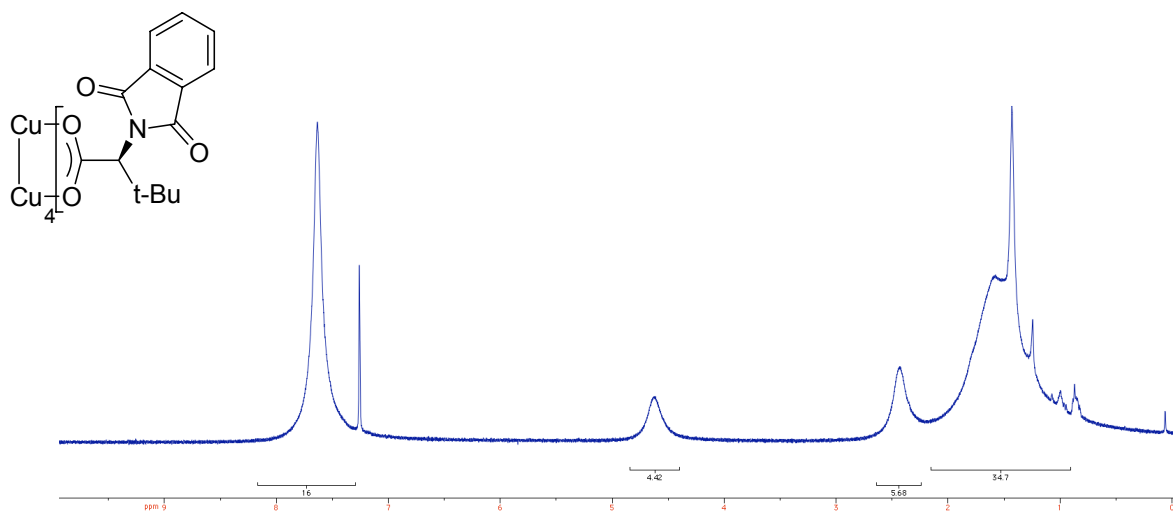

### References

<sup>1</sup> Tsutsui, H.; Abe, T.; Nakamura, S.; Anada, M.; Hashimoto, S. *Chem. Pharm. Bull.* **2005**, *10*, 1366-1368.

<sup>2</sup> Müller, P.; Allenbach, Y. F.; Robert, E. *Tetrahedron: Asymmetry* **2003**, *14*, 779.

### Summary of crystallographic details

Crystallographic details for **2**: C<sub>64</sub>H<sub>71</sub>Cu<sub>2</sub>N<sub>7</sub>O<sub>17</sub>, 1337.36 dalton, orthorhombic, *P*2<sub>1</sub>2<sub>1</sub>2, *a*=25.068(4)Å, *b*=26.409(4)Å, *c*=10.1657(15)Å, *V*=6730.0(17)Å<sup>3</sup>, *T*=200(2)K, *Z*=4, *Refl*<sub>coll</sub>/*Refl*<sub>unique</sub>/*R*<sub>int</sub>=85763/16721/0.0533, *R*(*I*<sub>o</sub>>2*I*σ)=0.0466, CCDC 761721

Crystallographic details for **3**: C<sub>84</sub>H<sub>88</sub>N<sub>4</sub>O<sub>21</sub>Rh<sub>2</sub>, 1695.40 dalton, orthorhombic, *P*2<sub>1</sub>2<sub>1</sub>2, *a*=21.627(10)Å, *b*=21.826(10)Å, *c*=17.238(8)Å, *V*=8137(6)Å<sup>3</sup>, *T*=200(2)K, *Z*=4, *Refl*<sub>coll</sub>/*Refl*<sub>unique</sub>/*R*<sub>int</sub>=111612/20130/0.0526, *R*(*I*<sub>o</sub>>2*I*σ)=0.0401, CCDC 761720

Crystallographic details for **4**: C<sub>78</sub>H<sub>63</sub>N<sub>9</sub>O<sub>16</sub>Rh<sub>2</sub>, 1588.19 dalton, monoclinic, *P*2<sub>1</sub>, *a*=12.649(4)Å, *b*=24.398(7)Å, *c*=12.670(4)Å, β=107.947(4)°, *V*=3719.9(18)Å<sup>3</sup>, *T*=200(2)K, *Z*=2, *Refl*<sub>coll</sub>/*Refl*<sub>unique</sub>/*R*<sub>int</sub>=51127/18446/0.0403, *R*(*I*<sub>o</sub>>2*I*σ)=0.0525, CCDC 770533

Crystallographic details for **5**: C<sub>85</sub>H<sub>84</sub>N<sub>6</sub>O<sub>16</sub>Rh<sub>2</sub>, 1651.40 dalton, orthorhombic, *P*2<sub>1</sub>2<sub>1</sub>2<sub>1</sub>, *a*=13.412(3)Å, *b*=21.7183(5)Å, *c*=27.323(6)Å, *V*=7982(3)Å<sup>3</sup>, *T*=170(2)K, *Z*=4, *Refl*<sub>coll</sub>/*Refl*<sub>unique</sub>/*R*<sub>int</sub>=94308.19746/0.0469, *R*(*I*<sub>o</sub>>2*I*σ)=0.0297, CCDC 761719.

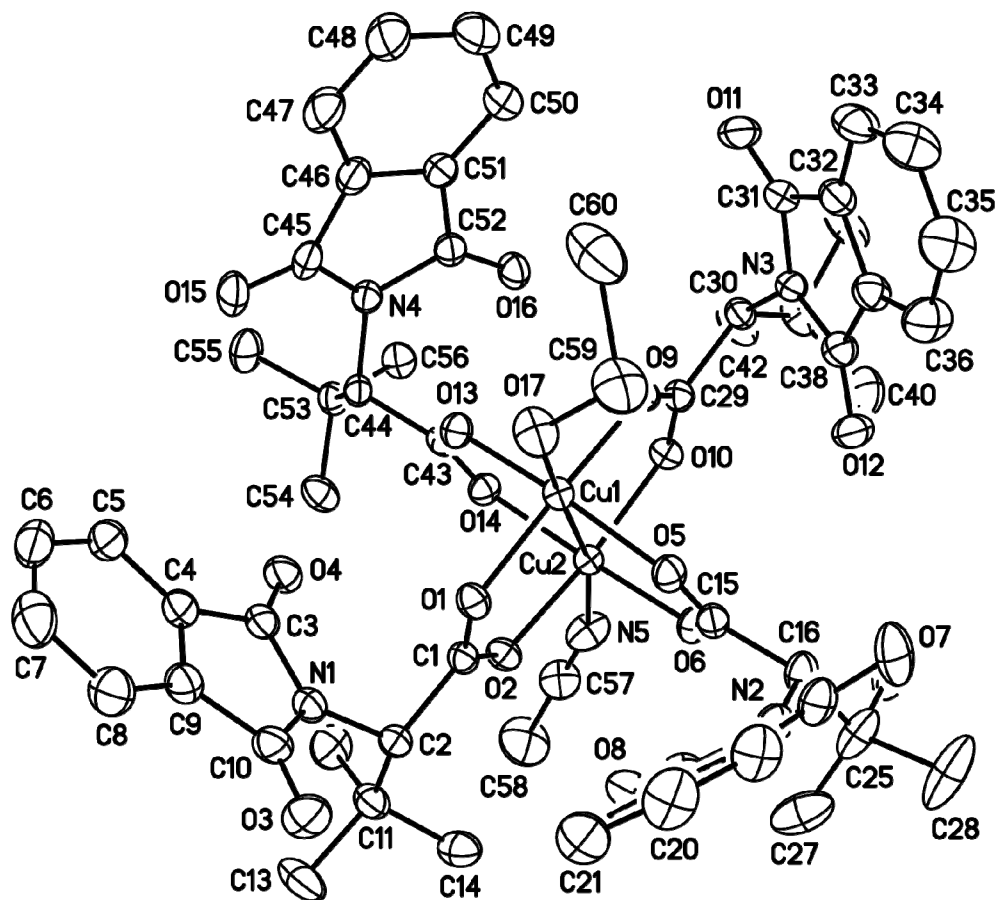

Figure 1. Molecular diagram of 2 with ellipsoids at 30% probability. Minor disordered contributor and H-atoms deleted for clarity.



Table 1. Crystal data and structure refinement for joef097f.

|                                   |                                                                                                                 |
|-----------------------------------|-----------------------------------------------------------------------------------------------------------------|
| Identification code               | joef097f                                                                                                        |
| Empirical formula                 | C <sub>64</sub> H <sub>71</sub> Cu <sub>2</sub> N <sub>7</sub> O <sub>17</sub>                                  |
| Formula weight                    | 1337.36                                                                                                         |
| Temperature                       | 200(2) K                                                                                                        |
| Wavelength                        | 0.71073 Å                                                                                                       |
| Crystal system, space group       | Orthorhombic, P2(1)2(1)2                                                                                        |
| Unit cell dimensions              | a = 25.068(4) Å    alpha = 90 deg.<br>b = 26.409(4) Å    beta = 90 deg.<br>c = 10.1657(15) Å    gamma = 90 deg. |
| Volume                            | 6730.0(17) Å <sup>3</sup>                                                                                       |
| Z, Calculated density             | 4, 1.320 Mg/m <sup>3</sup>                                                                                      |
| Absorption coefficient            | 0.703 mm <sup>-1</sup>                                                                                          |
| F(000)                            | 2792                                                                                                            |
| Crystal size                      | 0.24 x 0.16 x 0.13 mm                                                                                           |
| Theta range for data collection   | 1.74 to 28.28 deg.                                                                                              |
| Limiting indices                  | -33<=h<=33, -35<=k<=35, -13<=l<=13                                                                              |
| Reflections collected / unique    | 85763 / 16721 [R(int) = 0.0523]                                                                                 |
| Completeness to theta = 25.00     | 100.0 %                                                                                                         |
| Absorption correction             | Semi-empirical from equivalents                                                                                 |
| Max. and min. transmission        | 0.9129 and 0.8472                                                                                               |
| Refinement method                 | Full-matrix least-squares on F <sup>2</sup>                                                                     |
| Data / restraints / parameters    | 16721 / 1 / 776                                                                                                 |
| Goodness-of-fit on F <sup>2</sup> | 1.073                                                                                                           |
| Final R indices [I>2sigma(I)]     | R1 = 0.0466, wR2 = 0.1084                                                                                       |
| R indices (all data)              | R1 = 0.0552, wR2 = 0.1137                                                                                       |
| Absolute structure parameter      | -0.009(8)                                                                                                       |
| Largest diff. peak and hole       | 0.713 and -0.287 e.Å <sup>-3</sup>                                                                              |

Table 2. Atomic coordinates ( $\times 10^4$ ) and equivalent isotropic displacement parameters ( $\text{\AA}^2 \times 10^3$ ) for joef097f. U(eq) is defined as one third of the trace of the orthogonalized Uij tensor.

|        | x        | y        | z         | U(eq)   |
|--------|----------|----------|-----------|---------|
| Cu (1) | 3195 (1) | 3287 (1) | 7813 (1)  | 33 (1)  |
| Cu (2) | 3403 (1) | 3424 (1) | 10336 (1) | 31 (1)  |
| N (1)  | 4036 (1) | 1745 (1) | 8010 (3)  | 43 (1)  |
| N (2)  | 1642 (1) | 2565 (1) | 9176 (3)  | 47 (1)  |
| N (3)  | 2431 (1) | 4832 (1) | 7686 (2)  | 36 (1)  |
| N (4)  | 4795 (1) | 4040 (1) | 7040 (2)  | 39 (1)  |
| O (1)  | 3406 (1) | 2578 (1) | 8000 (2)  | 40 (1)  |
| O (2)  | 3577 (1) | 2692 (1) | 10144 (2) | 40 (1)  |
| O (3)  | 3538 (1) | 1060 (1) | 7335 (3)  | 68 (1)  |
| O (4)  | 4621 (1) | 2430 (1) | 8002 (3)  | 54 (1)  |
| O (5)  | 2488 (1) | 3124 (1) | 8510 (2)  | 43 (1)  |
| O (6)  | 2654 (1) | 3259 (1) | 10655 (2) | 41 (1)  |
| O (7)  | 956 (1)  | 2900 (1) | 7940 (3)  | 77 (1)  |
| O (8)  | 2375 (1) | 2076 (1) | 9776 (3)  | 57 (1)  |
| O (9)  | 3010 (1) | 4001 (1) | 7843 (2)  | 39 (1)  |
| O (10) | 3182 (1) | 4129 (1) | 9987 (2)  | 39 (1)  |
| O (11) | 2840 (1) | 5352 (1) | 6154 (2)  | 56 (1)  |
| O (12) | 1865 (1) | 4239 (1) | 8611 (2)  | 54 (1)  |
| O (13) | 3947 (1) | 3472 (1) | 7623 (2)  | 39 (1)  |
| O (14) | 4133 (1) | 3581 (1) | 9761 (2)  | 38 (1)  |
| O (15) | 5164 (1) | 3520 (1) | 5457 (3)  | 60 (1)  |
| O (16) | 4233 (1) | 4636 (1) | 8008 (2)  | 47 (1)  |
| C (1)  | 3562 (1) | 2433 (1) | 9116 (3)  | 36 (1)  |
| C (2)  | 3723 (1) | 1869 (1) | 9196 (3)  | 39 (1)  |
| C (3)  | 4451 (1) | 2046 (1) | 7507 (3)  | 44 (1)  |
| C (4)  | 4626 (1) | 1789 (1) | 6277 (3)  | 50 (1)  |
| C (5)  | 5030 (2) | 1907 (2) | 5420 (4)  | 62 (1)  |
| C (6)  | 5111 (2) | 1597 (2) | 4354 (4)  | 71 (1)  |
| C (7)  | 4790 (2) | 1175 (2) | 4168 (4)  | 81 (2)  |
| C (8)  | 4378 (2) | 1055 (2) | 5021 (4)  | 71 (1)  |
| C (9)  | 4305 (2) | 1368 (1) | 6089 (3)  | 52 (1)  |
| C (10) | 3905 (2) | 1350 (1) | 7174 (4)  | 51 (1)  |
| C (11) | 3991 (1) | 1683 (1) | 10483 (3) | 49 (1)  |
| C (12) | 4498 (2) | 1967 (2) | 10823 (4) | 65 (1)  |
| C (13) | 4113 (2) | 1107 (1) | 10298 (5) | 80 (1)  |
| C (14) | 3581 (2) | 1730 (2) | 11607 (3) | 60 (1)  |
| C (15) | 2358 (1) | 3142 (1) | 9708 (3)  | 39 (1)  |
| C (16) | 1767 (1) | 3023 (1) | 9940 (3)  | 48 (1)  |
| C (17) | 1274 (1) | 2571 (2) | 8139 (4)  | 54 (1)  |
| C (18) | 1377 (1) | 2098 (1) | 7374 (4)  | 51 (1)  |
| C (19) | 1120 (2) | 1906 (2) | 6281 (4)  | 65 (1)  |
| C (20) | 1328 (2) | 1473 (2) | 5725 (4)  | 76 (1)  |
| C (21) | 1773 (2) | 1234 (2) | 6251 (4)  | 70 (1)  |
| C (22) | 2028 (2) | 1429 (1) | 7350 (4)  | 58 (1)  |
| C (23) | 1817 (1) | 1865 (1) | 7905 (3)  | 47 (1)  |
| C (24) | 1999 (1) | 2156 (1) | 9063 (3)  | 46 (1)  |
| C (25) | 1554 (2) | 3017 (2) | 11367 (4) | 67 (1)  |
| C (26) | 1636 (2) | 3544 (2) | 11981 (4) | 79 (1)  |
| C (27) | 1811 (2) | 2616 (2) | 12204 (4) | 91 (2)  |
| C (28) | 943 (2)  | 2927 (3) | 11275 (6) | 117 (3) |

|         |          |           |           |         |
|---------|----------|-----------|-----------|---------|
| C (29)  | 3029 (1) | 4267 (1)  | 8864 (3)  | 37 (1)  |
| C (30)  | 2865 (1) | 4825 (1)  | 8657 (3)  | 37 (1)  |
| C (31)  | 2479 (1) | 5082 (1)  | 6474 (3)  | 43 (1)  |
| C (32)  | 1990 (1) | 4940 (1)  | 5704 (3)  | 47 (1)  |
| C (33)  | 1825 (2) | 5084 (2)  | 4474 (3)  | 60 (1)  |
| C (34)  | 1362 (2) | 4874 (2)  | 3994 (4)  | 73 (1)  |
| C (35)  | 1076 (2) | 4533 (2)  | 4719 (5)  | 79 (1)  |
| C (36)  | 1236 (2) | 4384 (2)  | 5966 (4)  | 68 (1)  |
| C (37)  | 1702 (1) | 4596 (1)  | 6445 (3)  | 46 (1)  |
| C (38)  | 1984 (1) | 4515 (1)  | 7721 (3)  | 44 (1)  |
| C (39)  | 2771 (2) | 5170 (1)  | 9847 (3)  | 50 (1)  |
| C (40)  | 2325 (2) | 4980 (2)  | 10747 (4) | 74 (1)  |
| C (41)  | 2633 (2) | 5700 (1)  | 9322 (4)  | 71 (1)  |
| C (42)  | 3293 (2) | 5214 (1)  | 10631 (4) | 65 (1)  |
| C (43)  | 4252 (1) | 3572 (1)  | 8568 (3)  | 35 (1)  |
| C (44)  | 4832 (1) | 3674 (1)  | 8136 (3)  | 36 (1)  |
| C (45)  | 4915 (1) | 3895 (1)  | 5746 (3)  | 47 (1)  |
| C (46)  | 4662 (1) | 4274 (1)  | 4876 (3)  | 50 (1)  |
| C (47)  | 4654 (2) | 4308 (2)  | 3517 (4)  | 72 (1)  |
| C (48)  | 4351 (2) | 4688 (2)  | 2964 (4)  | 86 (2)  |
| C (49)  | 4072 (2) | 5024 (2)  | 3731 (4)  | 77 (1)  |
| C (50)  | 4078 (2) | 4994 (2)  | 5096 (4)  | 57 (1)  |
| C (51)  | 4376 (1) | 4612 (1)  | 5641 (3)  | 44 (1)  |
| C (52)  | 4441 (1) | 4459 (1)  | 7047 (3)  | 40 (1)  |
| C (53)  | 5261 (1) | 3797 (1)  | 9176 (3)  | 41 (1)  |
| C (54)  | 5278 (1) | 3368 (1)  | 10178 (4) | 54 (1)  |
| C (55)  | 5798 (1) | 3821 (2)  | 8449 (4)  | 61 (1)  |
| C (56)  | 5165 (1) | 4296 (1)  | 9877 (3)  | 48 (1)  |
| N (5)   | 3650 (1) | 3360 (1)  | 12411 (3) | 61 (1)  |
| C (57)  | 3859 (2) | 3155 (2)  | 13242 (4) | 60 (1)  |
| C (58)  | 4124 (2) | 2879 (2)  | 14313 (5) | 99 (2)  |
| O (17)  | 2998 (5) | 3221 (4)  | 5741 (9)  | 58 (1)  |
| C (59)  | 2626 (4) | 3534 (6)  | 5030 (20) | 96 (3)  |
| C (60)  | 2875 (4) | 4014 (3)  | 4533 (8)  | 110 (3) |
| O (17') | 2999 (7) | 3146 (6)  | 5760 (13) | 58 (1)  |
| C (59') | 2575 (7) | 3391 (10) | 5140 (30) | 96 (3)  |
| C (60') | 2019 (7) | 3258 (5)  | 5573 (12) | 110 (3) |

---

Table 3. Bond lengths [Å] and angles [deg] for joef097f.

---

|              |            |
|--------------|------------|
| Cu(1)-O(9)   | 1.9434(19) |
| Cu(1)-O(1)   | 1.9552(19) |
| Cu(1)-O(13)  | 1.956(2)   |
| Cu(1)-O(5)   | 1.958(2)   |
| Cu(1)-O(17') | 2.177(13)  |
| Cu(1)-O(17)  | 2.170(8)   |
| Cu(1)-Cu(2)  | 2.6423(6)  |
| Cu(2)-O(6)   | 1.954(2)   |
| Cu(2)-O(14)  | 1.965(2)   |
| Cu(2)-O(10)  | 1.975(2)   |
| Cu(2)-O(2)   | 1.992(2)   |
| Cu(2)-N(5)   | 2.205(3)   |
| N(1)-C(10)   | 1.386(4)   |
| N(1)-C(3)    | 1.404(4)   |
| N(1)-C(2)    | 1.476(4)   |
| N(2)-C(17)   | 1.400(4)   |
| N(2)-C(24)   | 1.409(4)   |
| N(2)-C(16)   | 1.471(4)   |
| N(3)-C(38)   | 1.399(4)   |
| N(3)-C(31)   | 1.402(4)   |
| N(3)-C(30)   | 1.469(4)   |
| N(4)-C(45)   | 1.403(4)   |
| N(4)-C(52)   | 1.418(4)   |
| N(4)-C(44)   | 1.479(4)   |
| O(1)-C(1)    | 1.259(3)   |
| O(2)-C(1)    | 1.249(3)   |
| O(3)-C(10)   | 1.207(4)   |
| O(4)-C(3)    | 1.209(4)   |
| O(5)-C(15)   | 1.261(4)   |
| O(6)-C(15)   | 1.253(4)   |
| O(7)-C(17)   | 1.198(4)   |
| O(8)-C(24)   | 1.207(4)   |
| O(9)-C(29)   | 1.254(3)   |
| O(10)-C(29)  | 1.258(3)   |
| O(11)-C(31)  | 1.198(4)   |
| O(12)-C(38)  | 1.199(4)   |
| O(13)-C(43)  | 1.257(3)   |
| O(14)-C(43)  | 1.250(3)   |
| O(15)-C(45)  | 1.207(4)   |
| O(16)-C(52)  | 1.202(4)   |
| C(1)-C(2)    | 1.545(4)   |
| C(2)-C(11)   | 1.550(4)   |
| C(3)-C(4)    | 1.490(5)   |
| C(4)-C(5)    | 1.372(5)   |
| C(4)-C(9)    | 1.386(5)   |
| C(5)-C(6)    | 1.372(6)   |
| C(6)-C(7)    | 1.387(7)   |
| C(7)-C(8)    | 1.385(6)   |
| C(8)-C(9)    | 1.376(5)   |
| C(9)-C(10)   | 1.492(5)   |
| C(11)-C(12)  | 1.515(5)   |
| C(11)-C(14)  | 1.540(5)   |
| C(11)-C(13)  | 1.565(5)   |
| C(15)-C(16)  | 1.534(4)   |
| C(16)-C(25)  | 1.545(5)   |
| C(17)-C(18)  | 1.492(5)   |
| C(18)-C(23)  | 1.375(5)   |

|                         |            |
|-------------------------|------------|
| C (18) -C (19)          | 1.381 (5)  |
| C (19) -C (20)          | 1.377 (6)  |
| C (20) -C (21)          | 1.388 (6)  |
| C (21) -C (22)          | 1.387 (5)  |
| C (22) -C (23)          | 1.386 (5)  |
| C (23) -C (24)          | 1.478 (5)  |
| C (25) -C (27)          | 1.506 (7)  |
| C (25) -C (26)          | 1.539 (6)  |
| C (25) -C (28)          | 1.553 (6)  |
| C (29) -C (30)          | 1.544 (4)  |
| C (30) -C (39)          | 1.534 (4)  |
| C (31) -C (32)          | 1.501 (5)  |
| C (32) -C (33)          | 1.370 (5)  |
| C (32) -C (37)          | 1.385 (5)  |
| C (33) -C (34)          | 1.375 (6)  |
| C (34) -C (35)          | 1.366 (6)  |
| C (35) -C (36)          | 1.387 (6)  |
| C (36) -C (37)          | 1.382 (5)  |
| C (37) -C (38)          | 1.494 (4)  |
| C (39) -C (40)          | 1.530 (6)  |
| C (39) -C (41)          | 1.537 (5)  |
| C (39) -C (42)          | 1.538 (5)  |
| C (43) -C (44)          | 1.543 (4)  |
| C (44) -C (53)          | 1.543 (4)  |
| C (45) -C (46)          | 1.479 (5)  |
| C (46) -C (51)          | 1.382 (5)  |
| C (46) -C (47)          | 1.385 (5)  |
| C (47) -C (48)          | 1.378 (6)  |
| C (48) -C (49)          | 1.373 (6)  |
| C (49) -C (50)          | 1.390 (6)  |
| C (50) -C (51)          | 1.373 (5)  |
| C (51) -C (52)          | 1.495 (4)  |
| C (53) -C (56)          | 1.516 (4)  |
| C (53) -C (54)          | 1.525 (5)  |
| C (53) -C (55)          | 1.536 (5)  |
| N (5) -C (57)           | 1.131 (5)  |
| C (57) -C (58)          | 1.469 (6)  |
| O (17) -C (59)          | 1.4388     |
| C (59) -C (60)          | 1.5016     |
| O (17') -C (59')        | 1.3921     |
| C (59') -C (60')        | 1.5016     |
| O (9) -Cu (1) -O (1)    | 173.24 (9) |
| O (9) -Cu (1) -O (13)   | 89.39 (9)  |
| O (1) -Cu (1) -O (13)   | 89.33 (9)  |
| O (9) -Cu (1) -O (5)    | 89.52 (9)  |
| O (1) -Cu (1) -O (5)    | 89.94 (9)  |
| O (13) -Cu (1) -O (5)   | 164.43 (9) |
| O (9) -Cu (1) -O (17')  | 97.3 (4)   |
| O (1) -Cu (1) -O (17')  | 89.4 (4)   |
| O (13) -Cu (1) -O (17') | 99.5 (5)   |
| O (5) -Cu (1) -O (17')  | 96.0 (5)   |
| O (9) -Cu (1) -O (17)   | 92.2 (3)   |
| O (1) -Cu (1) -O (17)   | 94.6 (3)   |
| O (13) -Cu (1) -O (17)  | 98.2 (3)   |
| O (5) -Cu (1) -O (17)   | 97.3 (3)   |
| O (17') -Cu (1) -O (17) | 5.3 (6)    |
| O (9) -Cu (1) -Cu (2)   | 84.22 (6)  |
| O (1) -Cu (1) -Cu (2)   | 89.04 (6)  |
| O (13) -Cu (1) -Cu (2)  | 82.65 (6)  |
| O (5) -Cu (1) -Cu (2)   | 81.80 (7)  |

|                         |             |
|-------------------------|-------------|
| O (17') -Cu (1) -Cu (2) | 177.3 (5)   |
| O (17) -Cu (1) -Cu (2)  | 176.3 (3)   |
| O (6) -Cu (2) -O (14)   | 172.21 (9)  |
| O (6) -Cu (2) -O (10)   | 88.22 (9)   |
| O (14) -Cu (2) -O (10)  | 90.49 (9)   |
| O (6) -Cu (2) -O (2)    | 90.61 (9)   |
| O (14) -Cu (2) -O (2)   | 88.45 (9)   |
| O (10) -Cu (2) -O (2)   | 163.54 (8)  |
| O (6) -Cu (2) -N (5)    | 95.42 (10)  |
| O (14) -Cu (2) -N (5)   | 92.26 (10)  |
| O (10) -Cu (2) -N (5)   | 108.87 (11) |
| O (2) -Cu (2) -N (5)    | 87.58 (11)  |
| O (6) -Cu (2) -Cu (1)   | 86.61 (6)   |
| O (14) -Cu (2) -Cu (1)  | 85.62 (6)   |
| O (10) -Cu (2) -Cu (1)  | 84.21 (6)   |
| O (2) -Cu (2) -Cu (1)   | 79.33 (6)   |
| N (5) -Cu (2) -Cu (1)   | 166.79 (10) |
| C (10) -N (1) -C (3)    | 112.3 (3)   |
| C (10) -N (1) -C (2)    | 122.8 (3)   |
| C (3) -N (1) -C (2)     | 124.4 (3)   |
| C (17) -N (2) -C (24)   | 111.4 (3)   |
| C (17) -N (2) -C (16)   | 121.9 (3)   |
| C (24) -N (2) -C (16)   | 122.6 (3)   |
| C (38) -N (3) -C (31)   | 111.9 (3)   |
| C (38) -N (3) -C (30)   | 124.5 (2)   |
| C (31) -N (3) -C (30)   | 122.3 (2)   |
|                         |             |
| C (45) -N (4) -C (52)   | 110.6 (3)   |
| C (45) -N (4) -C (44)   | 120.9 (2)   |
| C (52) -N (4) -C (44)   | 123.1 (2)   |
| C (1) -O (1) -Cu (1)    | 117.55 (18) |
| C (1) -O (2) -Cu (2)    | 127.34 (19) |
| C (15) -O (5) -Cu (1)   | 125.06 (19) |
| C (15) -O (6) -Cu (2)   | 119.73 (19) |
| C (29) -O (9) -Cu (1)   | 123.14 (18) |
| C (29) -O (10) -Cu (2)  | 121.42 (18) |
| C (43) -O (13) -Cu (1)  | 124.29 (19) |
| C (43) -O (14) -Cu (2)  | 120.52 (19) |
| O (2) -C (1) -O (1)     | 126.6 (3)   |
| O (2) -C (1) -C (2)     | 118.4 (2)   |
| O (1) -C (1) -C (2)     | 114.9 (2)   |
| N (1) -C (2) -C (1)     | 108.0 (2)   |
| N (1) -C (2) -C (11)    | 112.9 (2)   |
| C (1) -C (2) -C (11)    | 117.5 (2)   |
| O (4) -C (3) -N (1)     | 125.7 (3)   |
| O (4) -C (3) -C (4)     | 128.9 (3)   |
| N (1) -C (3) -C (4)     | 105.4 (3)   |
| C (5) -C (4) -C (9)     | 121.6 (4)   |
| C (5) -C (4) -C (3)     | 130.4 (4)   |
| C (9) -C (4) -C (3)     | 108.1 (3)   |
| C (6) -C (5) -C (4)     | 118.3 (4)   |
| C (5) -C (6) -C (7)     | 120.1 (4)   |
| C (8) -C (7) -C (6)     | 122.0 (4)   |
| C (9) -C (8) -C (7)     | 117.1 (4)   |
| C (8) -C (9) -C (4)     | 120.9 (4)   |
| C (8) -C (9) -C (10)    | 130.8 (4)   |
| C (4) -C (9) -C (10)    | 108.3 (3)   |
| O (3) -C (10) -N (1)    | 125.1 (3)   |
| O (3) -C (10) -C (9)    | 129.3 (3)   |
| N (1) -C (10) -C (9)    | 105.6 (3)   |

|                   |          |
|-------------------|----------|
| C(12)-C(11)-C(14) | 110.5(3) |
| C(12)-C(11)-C(2)  | 113.6(3) |
| C(14)-C(11)-C(2)  | 108.2(3) |
| C(12)-C(11)-C(13) | 110.0(3) |
| C(14)-C(11)-C(13) | 107.3(3) |
| C(2)-C(11)-C(13)  | 106.9(3) |
| O(6)-C(15)-O(5)   | 126.8(3) |
| O(6)-C(15)-C(16)  | 120.3(3) |
| O(5)-C(15)-C(16)  | 112.9(3) |
| N(2)-C(16)-C(15)  | 107.0(2) |
| N(2)-C(16)-C(25)  | 114.4(3) |
| C(15)-C(16)-C(25) | 118.7(3) |
| O(7)-C(17)-N(2)   | 125.0(3) |
| O(7)-C(17)-C(18)  | 129.3(3) |
| N(2)-C(17)-C(18)  | 105.7(3) |
| C(23)-C(18)-C(19) | 121.6(4) |
| C(23)-C(18)-C(17) | 108.0(3) |
| C(19)-C(18)-C(17) | 130.3(4) |
| C(20)-C(19)-C(18) | 117.4(4) |
| C(19)-C(20)-C(21) | 121.6(4) |
| C(22)-C(21)-C(20) | 120.8(4) |
| C(23)-C(22)-C(21) | 117.4(4) |
| C(18)-C(23)-C(22) | 121.2(3) |
|                   |          |
| C(18)-C(23)-C(24) | 109.1(3) |
| C(22)-C(23)-C(24) | 129.7(3) |
| O(8)-C(24)-N(2)   | 125.5(3) |
| O(8)-C(24)-C(23)  | 129.0(3) |
| N(2)-C(24)-C(23)  | 105.5(3) |
| C(27)-C(25)-C(26) | 110.5(4) |
| C(27)-C(25)-C(16) | 112.9(4) |
| C(26)-C(25)-C(16) | 109.0(3) |
| C(27)-C(25)-C(28) | 110.4(4) |
| C(26)-C(25)-C(28) | 107.1(4) |
| C(16)-C(25)-C(28) | 106.6(4) |
| O(9)-C(29)-O(10)  | 127.0(3) |
| O(9)-C(29)-C(30)  | 114.2(2) |
| O(10)-C(29)-C(30) | 118.8(3) |
| N(3)-C(30)-C(39)  | 114.1(2) |
| N(3)-C(30)-C(29)  | 107.6(2) |
| C(39)-C(30)-C(29) | 120.1(2) |
| O(11)-C(31)-N(3)  | 125.7(3) |
| O(11)-C(31)-C(32) | 128.6(3) |
| N(3)-C(31)-C(32)  | 105.8(3) |
| C(33)-C(32)-C(37) | 121.4(3) |
| C(33)-C(32)-C(31) | 130.8(3) |
| C(37)-C(32)-C(31) | 107.8(3) |
| C(32)-C(33)-C(34) | 117.8(4) |
| C(35)-C(34)-C(33) | 121.1(4) |
| C(34)-C(35)-C(36) | 121.9(4) |
| C(37)-C(36)-C(35) | 116.8(4) |
| C(36)-C(37)-C(32) | 121.0(3) |
| C(36)-C(37)-C(38) | 130.5(3) |
| C(32)-C(37)-C(38) | 108.6(3) |
| O(12)-C(38)-N(3)  | 125.7(3) |
| O(12)-C(38)-C(37) | 128.6(3) |
| N(3)-C(38)-C(37)  | 105.8(3) |
| C(40)-C(39)-C(30) | 112.9(3) |
| C(40)-C(39)-C(41) | 110.0(3) |
| C(30)-C(39)-C(41) | 107.6(3) |

|                      |           |
|----------------------|-----------|
| C(40)-C(39)-C(42)    | 109.7(3)  |
| C(30)-C(39)-C(42)    | 108.8(3)  |
| C(41)-C(39)-C(42)    | 107.6(3)  |
| O(14)-C(43)-O(13)    | 126.9(3)  |
| O(14)-C(43)-C(44)    | 119.9(3)  |
| O(13)-C(43)-C(44)    | 113.1(2)  |
| N(4)-C(44)-C(53)     | 114.9(2)  |
| N(4)-C(44)-C(43)     | 105.6(2)  |
| C(53)-C(44)-C(43)    | 119.9(2)  |
| O(15)-C(45)-N(4)     | 124.3(3)  |
| O(15)-C(45)-C(46)    | 129.2(3)  |
| N(4)-C(45)-C(46)     | 106.5(3)  |
| C(51)-C(46)-C(47)    | 120.8(4)  |
| C(51)-C(46)-C(45)    | 108.8(3)  |
| C(47)-C(46)-C(45)    | 130.3(4)  |
| C(48)-C(47)-C(46)    | 117.5(4)  |
| C(49)-C(48)-C(47)    | 121.3(4)  |
| C(48)-C(49)-C(50)    | 121.6(4)  |
| C(51)-C(50)-C(49)    | 116.8(4)  |
| C(50)-C(51)-C(46)    | 122.0(3)  |
| C(50)-C(51)-C(52)    | 130.0(3)  |
| C(46)-C(51)-C(52)    | 107.9(3)  |
| O(16)-C(52)-N(4)     | 125.4(3)  |
| O(16)-C(52)-C(51)    | 128.7(3)  |
| N(4)-C(52)-C(51)     | 105.9(3)  |
| C(56)-C(53)-C(54)    | 109.7(3)  |
| C(56)-C(53)-C(55)    | 109.3(3)  |
| C(54)-C(53)-C(55)    | 109.1(3)  |
| C(56)-C(53)-C(44)    | 113.3(2)  |
| C(54)-C(53)-C(44)    | 108.6(2)  |
| C(55)-C(53)-C(44)    | 106.8(3)  |
| C(57)-N(5)-Cu(2)     | 151.8(3)  |
| N(5)-C(57)-C(58)     | 178.9(5)  |
| C(59)-O(17)-Cu(1)    | 126.0(11) |
| O(17)-C(59)-C(60)    | 112.6     |
| C(59')-O(17')-Cu(1)  | 121.6(16) |
| O(17')-C(59')-C(60') | 118.0     |

---

Symmetry transformations used to generate equivalent atoms:



Table 4. Anisotropic displacement parameters ( $\text{\AA}^2 \times 10^3$ ) for joef097f.  
 The anisotropic displacement factor exponent takes the form:  
 $-2 \pi^2 [ h^2 a^{*2} U_{11} + \dots + 2 h k a^* b^* U_{12} ]$

|       | U11    | U22    | U33    | U23    | U13    | U12    |
|-------|--------|--------|--------|--------|--------|--------|
| Cu(1) | 33(1)  | 34(1)  | 31(1)  | -3(1)  | -3(1)  | 2(1)   |
| Cu(2) | 31(1)  | 32(1)  | 31(1)  | -1(1)  | -3(1)  | 0(1)   |
| N(1)  | 44(1)  | 32(1)  | 52(2)  | -4(1)  | 3(1)   | 2(1)   |
| N(2)  | 35(1)  | 50(2)  | 56(2)  | -8(1)  | -3(1)  | -11(1) |
| N(3)  | 33(1)  | 35(1)  | 39(1)  | 7(1)   | -1(1)  | 1(1)   |
| N(4)  | 34(1)  | 38(1)  | 44(1)  | -1(1)  | 4(1)   | 1(1)   |
| O(1)  | 42(1)  | 35(1)  | 43(1)  | -6(1)  | -2(1)  | 2(1)   |
| O(2)  | 45(1)  | 32(1)  | 44(1)  | -3(1)  | -4(1)  | -1(1)  |
| O(3)  | 80(2)  | 51(1)  | 73(2)  | -18(1) | 13(2)  | -20(1) |
| O(4)  | 42(1)  | 39(1)  | 81(2)  | 2(1)   | -2(1)  | -4(1)  |
| O(5)  | 35(1)  | 42(1)  | 50(1)  | -4(1)  | -2(1)  | -1(1)  |
| O(6)  | 31(1)  | 46(1)  | 47(1)  | -7(1)  | -3(1)  | -5(1)  |
| O(7)  | 44(1)  | 88(2)  | 99(2)  | -28(2) | -21(2) | 16(1)  |
| O(8)  | 64(2)  | 46(1)  | 61(2)  | 1(1)   | -22(1) | -4(1)  |
| O(9)  | 47(1)  | 34(1)  | 36(1)  | 1(1)   | -1(1)  | 6(1)   |
| O(10) | 42(1)  | 36(1)  | 39(1)  | 2(1)   | -3(1)  | 2(1)   |
| O(11) | 53(2)  | 54(1)  | 63(2)  | 20(1)  | -1(1)  | -8(1)  |
| O(12) | 49(1)  | 60(1)  | 54(1)  | 18(1)  | 0(1)   | -8(1)  |
| O(13) | 35(1)  | 43(1)  | 40(1)  | -3(1)  | 0(1)   | -1(1)  |
| O(14) | 34(1)  | 41(1)  | 39(1)  | 0(1)   | -2(1)  | -3(1)  |
| O(15) | 57(2)  | 66(2)  | 58(1)  | -7(1)  | 15(1)  | 17(1)  |
| O(16) | 50(1)  | 43(1)  | 47(1)  | -6(1)  | 4(1)   | 9(1)   |
| C(1)  | 31(1)  | 33(1)  | 43(1)  | 1(1)   | -1(1)  | 0(1)   |
| C(2)  | 41(2)  | 32(1)  | 43(2)  | -2(1)  | 3(1)   | -1(1)  |
| C(3)  | 38(2)  | 38(2)  | 56(2)  | 6(1)   | -1(1)  | 5(1)   |
| C(4)  | 49(2)  | 49(2)  | 52(2)  | 8(2)   | 3(2)   | 12(2)  |
| C(5)  | 52(2)  | 70(2)  | 64(2)  | 21(2)  | 7(2)   | 16(2)  |
| C(6)  | 61(2)  | 96(3)  | 56(2)  | 21(2)  | 13(2)  | 27(2)  |
| C(7)  | 97(4)  | 97(4)  | 49(2)  | -1(2)  | 7(2)   | 35(3)  |
| C(8)  | 93(3)  | 66(2)  | 54(2)  | -7(2)  | 11(2)  | 8(2)   |
| C(9)  | 60(2)  | 46(2)  | 51(2)  | -2(2)  | 5(2)   | 7(2)   |
| C(10) | 62(2)  | 36(2)  | 54(2)  | -4(2)  | 6(2)   | -2(2)  |
| C(11) | 57(2)  | 42(2)  | 49(2)  | 5(2)   | 0(2)   | 10(2)  |
| C(12) | 49(2)  | 85(3)  | 60(2)  | 11(2)  | -16(2) | 6(2)   |
| C(13) | 113(4) | 47(2)  | 79(3)  | 10(2)  | -5(3)  | 29(2)  |
| C(14) | 78(3)  | 52(2)  | 51(2)  | 6(2)   | 2(2)   | -2(2)  |
| C(15) | 33(1)  | 34(1)  | 50(2)  | -4(1)  | 0(1)   | -1(1)  |
| C(16) | 34(2)  | 50(2)  | 61(2)  | -15(1) | -1(1)  | -3(1)  |
| C(17) | 32(2)  | 67(2)  | 63(2)  | -9(2)  | -4(2)  | -9(2)  |
| C(18) | 39(2)  | 57(2)  | 58(2)  | -9(2)  | -1(2)  | -12(2) |
| C(19) | 53(2)  | 76(3)  | 66(2)  | -16(2) | -14(2) | -10(2) |
| C(20) | 68(3)  | 86(3)  | 72(3)  | -30(2) | -8(2)  | -17(2) |
| C(21) | 79(3)  | 57(2)  | 72(3)  | -18(2) | -1(2)  | -8(2)  |
| C(22) | 73(2)  | 44(2)  | 58(2)  | 0(2)   | -4(2)  | -6(2)  |
| C(23) | 47(2)  | 45(2)  | 48(2)  | 3(1)   | -2(2)  | -13(1) |
| C(24) | 47(2)  | 40(2)  | 51(2)  | 2(1)   | -2(2)  | -12(1) |
| C(25) | 47(2)  | 95(3)  | 60(2)  | -25(2) | 17(2)  | -27(2) |
| C(26) | 50(2)  | 103(3) | 84(3)  | -47(3) | 9(2)   | -10(2) |
| C(27) | 125(4) | 94(3)  | 55(2)  | -7(2)  | 17(3)  | -48(3) |
| C(28) | 57(3)  | 190(7) | 105(4) | -67(4) | 33(3)  | -52(4) |
| C(29) | 32(2)  | 34(1)  | 43(2)  | 2(1)   | 1(1)   | 1(1)   |

|        |        |        |       |        |        |        |
|--------|--------|--------|-------|--------|--------|--------|
| C(30)  | 34(1)  | 34(1)  | 43(2) | 3(1)   | -3(1)  | 2(1)   |
| C(31)  | 45(2)  | 37(2)  | 46(2) | 7(1)   | 1(1)   | 5(1)   |
| C(32)  | 48(2)  | 42(2)  | 49(2) | 4(1)   | -2(1)  | 8(1)   |
| C(33)  | 73(2)  | 60(2)  | 47(2) | 13(2)  | -7(2)  | 9(2)   |
| C(34)  | 88(3)  | 76(3)  | 55(2) | 6(2)   | -27(2) | -1(2)  |
| C(35)  | 71(3)  | 89(3)  | 77(3) | 0(3)   | -33(2) | -12(2) |
| C(36)  | 59(2)  | 72(3)  | 73(3) | 8(2)   | -13(2) | -16(2) |
| C(37)  | 43(2)  | 47(2)  | 49(2) | 4(1)   | -8(1)  | 1(1)   |
| C(38)  | 41(2)  | 45(2)  | 47(2) | 6(1)   | -3(1)  | 0(1)   |
| C(39)  | 55(2)  | 42(2)  | 52(2) | -9(1)  | -12(2) | 14(2)  |
| C(40)  | 73(3)  | 88(3)  | 60(2) | -17(2) | 9(2)   | 21(2)  |
| C(41)  | 94(3)  | 44(2)  | 76(3) | -11(2) | -25(2) | 25(2)  |
| C(42)  | 72(3)  | 45(2)  | 78(3) | -11(2) | -29(2) | 11(2)  |
| C(43)  | 37(2)  | 26(1)  | 44(2) | 2(1)   | 0(1)   | 4(1)   |
| C(44)  | 33(1)  | 35(1)  | 41(2) | -3(1)  | 5(1)   | 3(1)   |
| C(45)  | 37(2)  | 56(2)  | 48(2) | -4(1)  | 13(1)  | 2(1)   |
| C(46)  | 40(2)  | 62(2)  | 48(2) | 6(2)   | 8(1)   | 2(2)   |
| C(47)  | 73(3)  | 97(3)  | 46(2) | 7(2)   | 16(2)  | 16(2)  |
| C(48)  | 93(4)  | 113(4) | 52(2) | 16(3)  | 17(2)  | 33(3)  |
| C(49)  | 87(3)  | 83(3)  | 62(2) | 21(2)  | -1(2)  | 24(3)  |
| C(50)  | 58(2)  | 57(2)  | 57(2) | 9(2)   | 0(2)   | 9(2)   |
| C(51)  | 38(2)  | 44(2)  | 52(2) | 5(1)   | 3(1)   | -2(1)  |
| C(52)  | 36(2)  | 35(1)  | 48(2) | -3(1)  | 2(1)   | -3(1)  |
| C(53)  | 34(2)  | 38(2)  | 51(2) | -3(1)  | 0(1)   | 1(1)   |
| C(54)  | 49(2)  | 47(2)  | 64(2) | 4(2)   | -15(2) | 4(2)   |
| C(55)  | 34(2)  | 72(2)  | 77(3) | -8(2)  | 3(2)   | 0(2)   |
| C(56)  | 46(2)  | 44(2)  | 53(2) | -9(1)  | -4(1)  | -4(1)  |
| N(5)   | 62(2)  | 83(2)  | 39(1) | 2(2)   | -6(1)  | -18(2) |
| C(57)  | 67(2)  | 68(2)  | 47(2) | -3(2)  | -6(2)  | -2(2)  |
| C(58)  | 100(4) | 120(5) | 78(3) | 21(3)  | -28(3) | 17(3)  |
| O(17)  | 70(2)  | 64(3)  | 40(1) | -10(2) | -13(1) | 17(2)  |
| C(59)  | 137(5) | 86(11) | 66(5) | -11(4) | -46(4) | 38(5)  |
| C(60)  | 171(9) | 95(5)  | 64(4) | -8(4)  | -9(5)  | 61(6)  |
| O(17') | 70(2)  | 64(3)  | 40(1) | -10(2) | -13(1) | 17(2)  |
| C(59') | 137(5) | 86(11) | 66(5) | -11(4) | -46(4) | 38(5)  |
| C(60') | 171(9) | 95(5)  | 64(4) | -8(4)  | -9(5)  | 61(6)  |

---

Table 5. Hydrogen coordinates ( $\times 10^4$ ) and isotropic displacement parameters ( $\text{\AA}^2 \times 10^3$ ) for joef097f.

|        | x    | y    | z     | U(eq) |
|--------|------|------|-------|-------|
| H(2A)  | 3383 | 1673 | 9117  | 47    |
| H(5A)  | 5249 | 2195 | 5560  | 74    |
| H(6A)  | 5387 | 1671 | 3744  | 85    |
| H(7A)  | 4854 | 962  | 3433  | 97    |
| H(8A)  | 4155 | 770  | 4874  | 85    |
| H(12A) | 4418 | 2328 | 10924 | 97    |
| H(12B) | 4760 | 1921 | 10117 | 97    |
| H(12C) | 4644 | 1834 | 11649 | 97    |
| H(13A) | 4248 | 966  | 11126 | 119   |
| H(13B) | 4382 | 1064 | 9608  | 119   |
| H(13C) | 3786 | 929  | 10045 | 119   |
| H(14A) | 3485 | 2087 | 11728 | 90    |
| H(14B) | 3737 | 1598 | 12422 | 90    |
| H(14C) | 3261 | 1535 | 11384 | 90    |
| H(16A) | 1568 | 3303 | 9494  | 58    |
| H(19A) | 813  | 2065 | 5926  | 78    |
| H(20A) | 1163 | 1335 | 4964  | 91    |
| H(21A) | 1904 | 933  | 5854  | 84    |
| H(22A) | 2336 | 1270 | 7708  | 70    |
| H(26A) | 2017 | 3598 | 12147 | 118   |
| H(26B) | 1440 | 3565 | 12812 | 118   |
| H(26C) | 1505 | 3804 | 11375 | 118   |
| H(27A) | 2200 | 2649 | 12155 | 137   |
| H(27B) | 1706 | 2280 | 11884 | 137   |
| H(27C) | 1695 | 2656 | 13119 | 137   |
| H(28A) | 875  | 2594 | 10888 | 176   |
| H(28B) | 782  | 3190 | 10720 | 176   |
| H(28C) | 786  | 2942 | 12157 | 176   |
| H(30A) | 3175 | 4980 | 8188  | 44    |
| H(33A) | 2024 | 5320 | 3969  | 72    |
| H(34A) | 1239 | 4968 | 3145  | 88    |
| H(35A) | 759  | 4394 | 4358  | 95    |
| H(36A) | 1036 | 4148 | 6467  | 81    |
| H(40A) | 2404 | 4634 | 11031 | 110   |
| H(40B) | 1986 | 4984 | 10269 | 110   |
| H(40C) | 2299 | 5201 | 11520 | 110   |
| H(41A) | 2909 | 5810 | 8701  | 107   |
| H(41B) | 2615 | 5940 | 10057 | 107   |
| H(41C) | 2287 | 5689 | 8874  | 107   |
| H(42A) | 3587 | 5296 | 10030 | 97    |
| H(42B) | 3368 | 4892 | 11071 | 97    |
| H(42C) | 3259 | 5483 | 11290 | 97    |
| H(44A) | 4954 | 3351 | 7720  | 43    |
| H(47A) | 4851 | 4079 | 2986  | 86    |
| H(48A) | 4335 | 4718 | 2034  | 103   |
| H(49A) | 3871 | 5284 | 3319  | 93    |
| H(50A) | 3884 | 5226 | 5627  | 69    |
| H(54A) | 5593 | 3408 | 10742 | 80    |
| H(54B) | 5298 | 3043 | 9717  | 80    |
| H(54C) | 4955 | 3377 | 10720 | 80    |
| H(55A) | 6085 | 3880 | 9084  | 92    |
| H(55B) | 5790 | 4097 | 7807  | 92    |

|         |      |      |       |     |
|---------|------|------|-------|-----|
| H (55C) | 5861 | 3499 | 7993  | 92  |
| H (56A) | 5435 | 4342 | 10566 | 71  |
| H (56B) | 4809 | 4294 | 10275 | 71  |
| H (56C) | 5190 | 4575 | 9243  | 71  |
| H (58A) | 3933 | 2562 | 14484 | 149 |
| H (58B) | 4124 | 3088 | 15110 | 149 |
| H (58C) | 4493 | 2804 | 14059 | 149 |
| H (17A) | 3174 | 2963 | 5258  | 70  |
| H (59A) | 2323 | 3620 | 5618  | 116 |
| H (59B) | 2482 | 3339 | 4279  | 116 |
| H (60A) | 2595 | 4242 | 4217  | 165 |
| H (60B) | 3119 | 3935 | 3810  | 165 |
| H (60C) | 3072 | 4178 | 5247  | 165 |
| H (17B) | 3208 | 2911 | 5272  | 70  |
| H (59C) | 2602 | 3323 | 4189  | 116 |
| H (59D) | 2624 | 3759 | 5270  | 116 |
| H (60D) | 1775 | 3294 | 4827  | 165 |
| H (60E) | 1909 | 3486 | 6283  | 165 |
| H (60F) | 2012 | 2907 | 5889  | 165 |

---

Table 6. Torsion angles [deg] for joe097f.

---

|                                |           |
|--------------------------------|-----------|
| O(9) - Cu(1) - Cu(2) - O(6)    | 88.70(9)  |
| O(1) - Cu(1) - Cu(2) - O(6)    | -91.72(9) |
| O(13) - Cu(1) - Cu(2) - O(6)   | 178.83(9) |
| O(5) - Cu(1) - Cu(2) - O(6)    | -1.65(9)  |
| O(9) - Cu(1) - Cu(2) - O(14)   | -90.79(9) |
| O(1) - Cu(1) - Cu(2) - O(14)   | 88.78(9)  |
| O(13) - Cu(1) - Cu(2) - O(14)  | -0.67(9)  |
| O(5) - Cu(1) - Cu(2) - O(14)   | 178.86(9) |
| O(9) - Cu(1) - Cu(2) - O(10)   | 0.15(9)   |
| O(1) - Cu(1) - Cu(2) - O(10)   | 179.72(9) |
| O(13) - Cu(1) - Cu(2) - O(10)  | 90.28(9)  |
| O(5) - Cu(1) - Cu(2) - O(10)   | -90.20(9) |
| O(9) - Cu(1) - Cu(2) - O(2)    | 179.96(9) |
| O(1) - Cu(1) - Cu(2) - O(2)    | -0.46(9)  |
| O(13) - Cu(1) - Cu(2) - O(2)   | -89.91(9) |
| O(5) - Cu(1) - Cu(2) - O(2)    | 89.61(9)  |
| O(9) - Cu(1) - Cu(2) - N(5)    | -172.0(4) |
| O(1) - Cu(1) - Cu(2) - N(5)    | 7.6(4)    |
| O(13) - Cu(1) - Cu(2) - N(5)   | -81.9(4)  |
| O(5) - Cu(1) - Cu(2) - N(5)    | 97.6(4)   |
| O(13) - Cu(1) - O(1) - C(1)    | 81.6(2)   |
| O(5) - Cu(1) - O(1) - C(1)     | -82.8(2)  |
| O(17') - Cu(1) - O(1) - C(1)   | -178.8(5) |
| O(17) - Cu(1) - O(1) - C(1)    | 179.8(4)  |
| Cu(2) - Cu(1) - O(1) - C(1)    | -1.0(2)   |
| O(6) - Cu(2) - O(2) - C(1)     | 88.8(2)   |
| O(14) - Cu(2) - O(2) - C(1)    | -83.5(2)  |
| O(10) - Cu(2) - O(2) - C(1)    | 3.0(5)    |
| N(5) - Cu(2) - O(2) - C(1)     | -175.8(3) |
| Cu(1) - Cu(2) - O(2) - C(1)    | 2.3(2)    |
| O(9) - Cu(1) - O(5) - C(15)    | -82.4(2)  |
| O(1) - Cu(1) - O(5) - C(15)    | 90.9(2)   |
| O(13) - Cu(1) - O(5) - C(15)   | 3.6(5)    |
| O(17') - Cu(1) - O(5) - C(15)  | -179.7(5) |
| O(17) - Cu(1) - O(5) - C(15)   | -174.5(3) |
| Cu(2) - Cu(1) - O(5) - C(15)   | 1.8(2)    |
| O(10) - Cu(2) - O(6) - C(15)   | 86.4(2)   |
| O(2) - Cu(2) - O(6) - C(15)    | -77.2(2)  |
| N(5) - Cu(2) - O(6) - C(15)    | -164.8(2) |
| Cu(1) - Cu(2) - O(6) - C(15)   | 2.1(2)    |
| O(13) - Cu(1) - O(9) - C(29)   | -84.0(2)  |
| O(5) - Cu(1) - O(9) - C(29)    | 80.5(2)   |
| O(17') - Cu(1) - O(9) - C(29)  | 176.5(5)  |
| O(17) - Cu(1) - O(9) - C(29)   | 177.8(4)  |
| Cu(2) - Cu(1) - O(9) - C(29)   | -1.3(2)   |
| O(6) - Cu(2) - O(10) - C(29)   | -85.9(2)  |
| O(14) - Cu(2) - O(10) - C(29)  | 86.5(2)   |
| O(2) - Cu(2) - O(10) - C(29)   | 0.3(5)    |
| N(5) - Cu(2) - O(10) - C(29)   | 179.0(2)  |
| Cu(1) - Cu(2) - O(10) - C(29)  | 0.9(2)    |
| O(9) - Cu(1) - O(13) - C(43)   | 85.5(2)   |
| O(1) - Cu(1) - O(13) - C(43)   | -87.9(2)  |
| O(5) - Cu(1) - O(13) - C(43)   | -0.6(5)   |
| O(17') - Cu(1) - O(13) - C(43) | -177.2(5) |
| O(17) - Cu(1) - O(13) - C(43)  | 177.6(3)  |
| Cu(2) - Cu(1) - O(13) - C(43)  | 1.2(2)    |
| O(10) - Cu(2) - O(14) - C(43)  | -83.8(2)  |

|                                |             |
|--------------------------------|-------------|
| O (2) -Cu (2) -O (14) -C (43)  | 79.8 (2)    |
| N (5) -Cu (2) -O (14) -C (43)  | 167.3 (2)   |
| Cu (1) -Cu (2) -O (14) -C (43) | 0.38 (19)   |
| Cu (2) -O (2) -C (1) -O (1)    | -4.2 (5)    |
| Cu (2) -O (2) -C (1) -C (2)    | 179.13 (19) |
| Cu (1) -O (1) -C (1) -O (2)    | 3.2 (4)     |
| Cu (1) -O (1) -C (1) -C (2)    | 179.98 (18) |
| C (10) -N (1) -C (2) -C (1)    | -125.5 (3)  |
| C (3) -N (1) -C (2) -C (1)     | 45.7 (4)    |
| C (10) -N (1) -C (2) -C (11)   | 102.8 (3)   |
| C (3) -N (1) -C (2) -C (11)    | -86.0 (3)   |
| O (2) -C (1) -C (2) -N (1)     | -140.2 (3)  |
| O (1) -C (1) -C (2) -N (1)     | 42.8 (3)    |
| O (2) -C (1) -C (2) -C (11)    | -11.1 (4)   |
| O (1) -C (1) -C (2) -C (11)    | 171.9 (3)   |
| C (10) -N (1) -C (3) -O (4)    | 175.6 (3)   |
| C (2) -N (1) -C (3) -O (4)     | 3.6 (5)     |
| C (10) -N (1) -C (3) -C (4)    | -4.9 (3)    |
| C (2) -N (1) -C (3) -C (4)     | -176.9 (3)  |
| O (4) -C (3) -C (4) -C (5)     | 2.3 (6)     |
| N (1) -C (3) -C (4) -C (5)     | -177.2 (3)  |
| O (4) -C (3) -C (4) -C (9)     | -178.6 (3)  |
| N (1) -C (3) -C (4) -C (9)     | 1.9 (4)     |
| C (9) -C (4) -C (5) -C (6)     | 0.2 (5)     |
| C (3) -C (4) -C (5) -C (6)     | 179.2 (3)   |
| C (4) -C (5) -C (6) -C (7)     | -0.3 (6)    |
| C (5) -C (6) -C (7) -C (8)     | 1.0 (7)     |
| C (6) -C (7) -C (8) -C (9)     | -1.5 (6)    |
| C (7) -C (8) -C (9) -C (4)     | 1.4 (6)     |
| C (7) -C (8) -C (9) -C (10)    | 179.6 (4)   |
| C (5) -C (4) -C (9) -C (8)     | -0.8 (6)    |
| C (3) -C (4) -C (9) -C (8)     | -180.0 (3)  |
| C (5) -C (4) -C (9) -C (10)    | -179.4 (3)  |
| C (3) -C (4) -C (9) -C (10)    | 1.4 (4)     |
| C (3) -N (1) -C (10) -O (3)    | -174.3 (4)  |
| C (2) -N (1) -C (10) -O (3)    | -2.1 (5)    |
| C (3) -N (1) -C (10) -C (9)    | 5.7 (4)     |
| C (2) -N (1) -C (10) -C (9)    | 177.9 (3)   |
| C (8) -C (9) -C (10) -O (3)    | -2.6 (7)    |
| C (4) -C (9) -C (10) -O (3)    | 175.8 (4)   |
| C (8) -C (9) -C (10) -N (1)    | 177.3 (4)   |
| C (4) -C (9) -C (10) -N (1)    | -4.3 (4)    |
| N (1) -C (2) -C (11) -C (12)   | 68.7 (4)    |
| C (1) -C (2) -C (11) -C (12)   | -58.0 (4)   |
| N (1) -C (2) -C (11) -C (14)   | -168.2 (3)  |
| C (1) -C (2) -C (11) -C (14)   | 65.1 (4)    |
| N (1) -C (2) -C (11) -C (13)   | -52.9 (4)   |
| C (1) -C (2) -C (11) -C (13)   | -179.6 (3)  |
| Cu (2) -O (6) -C (15) -O (5)   | -1.5 (4)    |
| Cu (2) -O (6) -C (15) -C (16)  | -178.7 (2)  |
| Cu (1) -O (5) -C (15) -O (6)   | -0.8 (4)    |
| Cu (1) -O (5) -C (15) -C (16)  | 176.56 (19) |
| C (17) -N (2) -C (16) -C (15)  | -116.6 (3)  |
| C (24) -N (2) -C (16) -C (15)  | 38.8 (4)    |
| C (17) -N (2) -C (16) -C (25)  | 109.7 (4)   |
| C (24) -N (2) -C (16) -C (25)  | -94.9 (4)   |
| O (6) -C (15) -C (16) -N (2)   | -135.4 (3)  |
| O (5) -C (15) -C (16) -N (2)   | 47.1 (4)    |
| O (6) -C (15) -C (16) -C (25)  | -4.0 (5)    |
| O (5) -C (15) -C (16) -C (25)  | 178.4 (3)   |
| C (24) -N (2) -C (17) -O (7)   | -173.6 (4)  |

|                                |              |
|--------------------------------|--------------|
| C (16) -N (2) -C (17) -O (7)   | -15.8 (6)    |
| C (24) -N (2) -C (17) -C (18)  | 5.5 (4)      |
| C (16) -N (2) -C (17) -C (18)  | 163.4 (3)    |
| O (7) -C (17) -C (18) -C (23)  | 173.8 (4)    |
| N (2) -C (17) -C (18) -C (23)  | -5.2 (4)     |
| O (7) -C (17) -C (18) -C (19)  | -3.2 (7)     |
| N (2) -C (17) -C (18) -C (19)  | 177.8 (4)    |
| C (23) -C (18) -C (19) -C (20) | -1.0 (6)     |
| C (17) -C (18) -C (19) -C (20) | 175.6 (4)    |
| C (18) -C (19) -C (20) -C (21) | 1.0 (7)      |
| C (19) -C (20) -C (21) -C (22) | -1.0 (7)     |
| C (20) -C (21) -C (22) -C (23) | 0.9 (6)      |
| C (19) -C (18) -C (23) -C (22) | 1.0 (5)      |
| C (17) -C (18) -C (23) -C (22) | -176.3 (3)   |
| C (19) -C (18) -C (23) -C (24) | -179.7 (3)   |
| C (17) -C (18) -C (23) -C (24) | 3.0 (4)      |
| C (21) -C (22) -C (23) -C (18) | -1.0 (5)     |
| C (21) -C (22) -C (23) -C (24) | 179.9 (3)    |
| C (17) -N (2) -C (24) -O (8)   | 175.4 (3)    |
| C (16) -N (2) -C (24) -O (8)   | 17.7 (5)     |
| C (17) -N (2) -C (24) -C (23)  | -3.8 (4)     |
| C (16) -N (2) -C (24) -C (23)  | -161.4 (3)   |
| C (18) -C (23) -C (24) -O (8)  | -178.8 (4)   |
| C (22) -C (23) -C (24) -O (8)  | 0.4 (6)      |
| C (18) -C (23) -C (24) -N (2)  | 0.3 (4)      |
| C (22) -C (23) -C (24) -N (2)  | 179.5 (3)    |
| N (2) -C (16) -C (25) -C (27)  | 65.3 (4)     |
| C (15) -C (16) -C (25) -C (27) | -62.7 (4)    |
| N (2) -C (16) -C (25) -C (26)  | -171.5 (3)   |
| C (15) -C (16) -C (25) -C (26) | 60.5 (5)     |
| N (2) -C (16) -C (25) -C (28)  | -56.2 (5)    |
| C (15) -C (16) -C (25) -C (28) | 175.9 (4)    |
| Cu (1) -O (9) -C (29) -O (10)  | 2.6 (4)      |
| Cu (1) -O (9) -C (29) -C (30)  | 179.95 (18)  |
| Cu (2) -O (10) -C (29) -O (9)  | -2.3 (4)     |
| Cu (2) -O (10) -C (29) -C (30) | -179.60 (19) |
| C (38) -N (3) -C (30) -C (39)  | -88.7 (4)    |
| C (31) -N (3) -C (30) -C (39)  | 105.7 (3)    |
| C (38) -N (3) -C (30) -C (29)  | 47.1 (4)     |
| C (31) -N (3) -C (30) -C (29)  | -118.4 (3)   |
| O (9) -C (29) -C (30) -N (3)   | 36.3 (3)     |
| O (10) -C (29) -C (30) -N (3)  | -146.1 (3)   |
| O (9) -C (29) -C (30) -C (39)  | 169.0 (3)    |
| O (10) -C (29) -C (30) -C (39) | -13.4 (4)    |
| C (38) -N (3) -C (31) -O (11)  | -175.5 (3)   |
| C (30) -N (3) -C (31) -O (11)  | -8.3 (5)     |
| C (38) -N (3) -C (31) -C (32)  | 5.0 (3)      |
| C (30) -N (3) -C (31) -C (32)  | 172.2 (2)    |
| O (11) -C (31) -C (32) -C (33) | -1.0 (6)     |
| N (3) -C (31) -C (32) -C (33)  | 178.4 (4)    |
| O (11) -C (31) -C (32) -C (37) | 176.6 (4)    |
| N (3) -C (31) -C (32) -C (37)  | -3.9 (3)     |
| C (37) -C (32) -C (33) -C (34) | 0.0 (5)      |
| C (31) -C (32) -C (33) -C (34) | 177.4 (4)    |
| C (32) -C (33) -C (34) -C (35) | -0.1 (7)     |
| C (33) -C (34) -C (35) -C (36) | 0.2 (8)      |
| C (34) -C (35) -C (36) -C (37) | -0.2 (7)     |
| C (35) -C (36) -C (37) -C (32) | 0.1 (6)      |
| C (35) -C (36) -C (37) -C (38) | -179.3 (4)   |
| C (33) -C (32) -C (37) -C (36) | 0.0 (6)      |
| C (31) -C (32) -C (37) -C (36) | -177.9 (3)   |

|                         |             |
|-------------------------|-------------|
| C(33)-C(32)-C(37)-C(38) | 179.5(3)    |
| C(31)-C(32)-C(37)-C(38) | 1.6(4)      |
| C(31)-N(3)-C(38)-O(12)  | 176.0(3)    |
| C(30)-N(3)-C(38)-O(12)  | 9.1(5)      |
| C(31)-N(3)-C(38)-C(37)  | -4.1(3)     |
| C(30)-N(3)-C(38)-C(37)  | -170.9(3)   |
| C(36)-C(37)-C(38)-O(12) | 0.8(6)      |
| C(32)-C(37)-C(38)-O(12) | -178.7(4)   |
| C(36)-C(37)-C(38)-N(3)  | -179.2(4)   |
| C(32)-C(37)-C(38)-N(3)  | 1.4(4)      |
| N(3)-C(30)-C(39)-C(40)  | 69.6(4)     |
| C(29)-C(30)-C(39)-C(40) | -60.3(4)    |
| N(3)-C(30)-C(39)-C(41)  | -52.0(4)    |
| C(29)-C(30)-C(39)-C(41) | 178.1(3)    |
| N(3)-C(30)-C(39)-C(42)  | -168.3(3)   |
| C(29)-C(30)-C(39)-C(42) | 61.8(4)     |
| Cu(2)-O(14)-C(43)-O(13) | 0.4(4)      |
| Cu(2)-O(14)-C(43)-C(44) | -177.29(18) |
| Cu(1)-O(13)-C(43)-O(14) | -1.4(4)     |
| Cu(1)-O(13)-C(43)-C(44) | 176.46(17)  |
| C(45)-N(4)-C(44)-C(53)  | 115.5(3)    |
| C(52)-N(4)-C(44)-C(53)  | -92.9(3)    |
| C(45)-N(4)-C(44)-C(43)  | -110.0(3)   |
| C(52)-N(4)-C(44)-C(43)  | 41.6(3)     |
| O(14)-C(43)-C(44)-N(4)  | -133.0(3)   |
| O(13)-C(43)-C(44)-N(4)  | 49.0(3)     |
| O(14)-C(43)-C(44)-C(53) | -1.3(4)     |
| O(13)-C(43)-C(44)-C(53) | -179.3(2)   |
| C(52)-N(4)-C(45)-O(15)  | -172.5(3)   |
| C(44)-N(4)-C(45)-O(15)  | -17.7(5)    |
| C(52)-N(4)-C(45)-C(46)  | 5.6(3)      |
| C(44)-N(4)-C(45)-C(46)  | 160.4(3)    |
| O(15)-C(45)-C(46)-C(51) | 174.4(4)    |
| N(4)-C(45)-C(46)-C(51)  | -3.6(4)     |
| O(15)-C(45)-C(46)-C(47) | -1.9(7)     |
| N(4)-C(45)-C(46)-C(47)  | -179.8(4)   |
| C(51)-C(46)-C(47)-C(48) | -0.4(7)     |
| C(45)-C(46)-C(47)-C(48) | 175.5(4)    |
| C(46)-C(47)-C(48)-C(49) | 0.9(8)      |
| C(47)-C(48)-C(49)-C(50) | -0.8(9)     |
| C(48)-C(49)-C(50)-C(51) | 0.2(8)      |
| C(49)-C(50)-C(51)-C(46) | 0.4(6)      |
| C(49)-C(50)-C(51)-C(52) | -176.2(4)   |
| C(47)-C(46)-C(51)-C(50) | -0.3(6)     |
| C(45)-C(46)-C(51)-C(50) | -176.9(3)   |
| C(47)-C(46)-C(51)-C(52) | 176.9(4)    |
| C(45)-C(46)-C(51)-C(52) | 0.3(4)      |
| C(45)-N(4)-C(52)-O(16)  | 173.0(3)    |
| C(44)-N(4)-C(52)-O(16)  | 18.9(5)     |
| C(45)-N(4)-C(52)-C(51)  | -5.4(3)     |
| C(44)-N(4)-C(52)-C(51)  | -159.5(3)   |
| C(50)-C(51)-C(52)-O(16) | 1.6(6)      |
| C(46)-C(51)-C(52)-O(16) | -175.3(3)   |
| C(50)-C(51)-C(52)-N(4)  | 179.9(4)    |
| C(46)-C(51)-C(52)-N(4)  | 3.1(3)      |
| N(4)-C(44)-C(53)-C(56)  | 62.0(3)     |
| C(43)-C(44)-C(53)-C(56) | -65.5(3)    |
| N(4)-C(44)-C(53)-C(54)  | -175.9(2)   |
| C(43)-C(44)-C(53)-C(54) | 56.6(3)     |
| N(4)-C(44)-C(53)-C(55)  | -58.4(3)    |
| C(43)-C(44)-C(53)-C(55) | 174.1(3)    |



|                                   |            |
|-----------------------------------|------------|
| O (6) -Cu (2) -N (5) -C (57)      | 106.1 (7)  |
| O (14) -Cu (2) -N (5) -C (57)     | -72.6 (7)  |
| O (10) -Cu (2) -N (5) -C (57)     | -163.9 (7) |
| O (2) -Cu (2) -N (5) -C (57)      | 15.7 (7)   |
| Cu (1) -Cu (2) -N (5) -C (57)     | 7.9 (10)   |
| O (9) -Cu (1) -O (17) -C (59)     | -26.1 (6)  |
| O (1) -Cu (1) -O (17) -C (59)     | 154.2 (6)  |
| O (13) -Cu (1) -O (17) -C (59)    | -115.8 (6) |
| O (5) -Cu (1) -O (17) -C (59)     | 63.7 (6)   |
| O (17') -Cu (1) -O (17) -C (59)   | 140 (9)    |
| Cu (1) -O (17) -C (59) -C (60)    | 85.4 (15)  |
| O (9) -Cu (1) -O (17') -C (59')   | -34.9 (10) |
| O (1) -Cu (1) -O (17') -C (59')   | 145.3 (10) |
| O (13) -Cu (1) -O (17') -C (59')  | -125.5 (9) |
| O (5) -Cu (1) -O (17') -C (59')   | 55.4 (10)  |
| O (17) -Cu (1) -O (17') -C (59')  | -49 (8)    |
| Cu (1) -O (17') -C (59') -C (60') | -69 (3)    |

---

Symmetry transformations used to generate equivalent atoms:

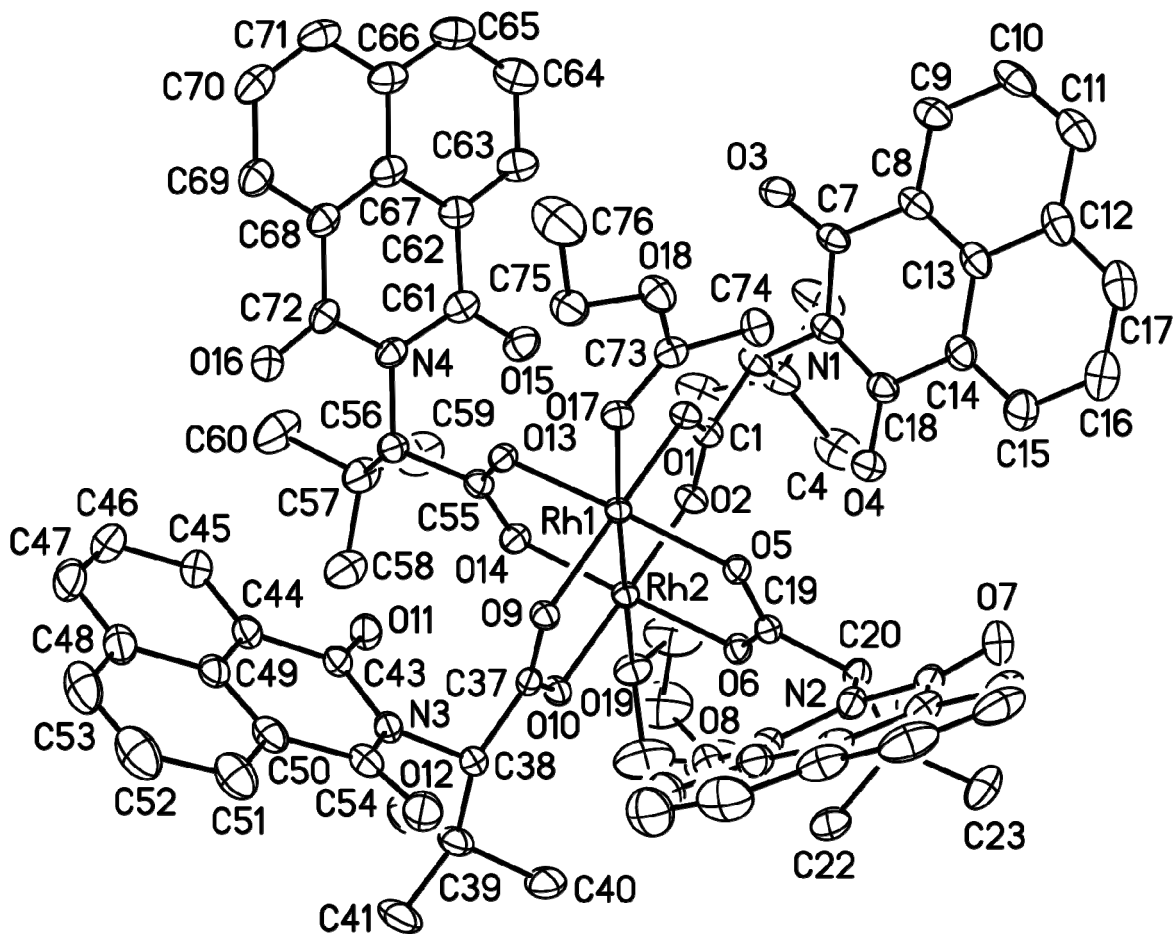

Figure 2. Molecular diagram of **3** with ellipsoids at 30% probability. Minor disordered contributor, cocrystallized ethyl acetate solvent and H-atoms deleted for clarity.

Table 1. Crystal data and structure refinement for joef094a.

|                                   |                                                                                                                 |
|-----------------------------------|-----------------------------------------------------------------------------------------------------------------|
| Identification code               | joef094a                                                                                                        |
| Empirical formula                 | C84 H88 N4 O21 Rh2                                                                                              |
| Formula weight                    | 1695.40                                                                                                         |
| Temperature                       | 200(2) K                                                                                                        |
| Wavelength                        | 0.71073 Å                                                                                                       |
| Crystal system, space group       | Orthorhombic, P2(1)2(1)2                                                                                        |
| Unit cell dimensions              | a = 21.627(10) Å    alpha = 90 deg.<br>b = 21.826(10) Å    beta = 90 deg.<br>c = 17.238(8) Å    gamma = 90 deg. |
| Volume                            | 8137(6) Å <sup>3</sup>                                                                                          |
| Z, Calculated density             | 4, 1.384 Mg/m <sup>3</sup>                                                                                      |
| Absorption coefficient            | 0.480 mm <sup>-1</sup>                                                                                          |
| F(000)                            | 3512                                                                                                            |
| Crystal size                      | 0.30 x 0.11 x 0.08 mm                                                                                           |
| Theta range for data collection   | 1.33 to 28.27 deg.                                                                                              |
| Limiting indices                  | -28<=h<=28, -29<=k<=29, -22<=l<=22                                                                              |
| Reflections collected / unique    | 111612 / 20130 [R(int) = 0.0526]                                                                                |
| Completeness to theta = 25.00     | 99.9 %                                                                                                          |
| Absorption correction             | Semi-empirical from equivalents                                                                                 |
| Max. and min. transmission        | 0.9622 and 0.8694                                                                                               |
| Refinement method                 | Full-matrix least-squares on F <sup>2</sup>                                                                     |
| Data / restraints / parameters    | 20130 / 181 / 1032                                                                                              |
| Goodness-of-fit on F <sup>2</sup> | 1.065                                                                                                           |
| Final R indices [I>2sigma(I)]     | R1 = 0.0401, wR2 = 0.0975                                                                                       |
| R indices (all data)              | R1 = 0.0479, wR2 = 0.1038                                                                                       |
| Absolute structure parameter      | -0.035(17)                                                                                                      |
| Largest diff. peak and hole       | 1.048 and -0.400 e.Å <sup>-3</sup>                                                                              |

Table 2. Atomic coordinates ( $\times 10^4$ ) and equivalent isotropic displacement parameters ( $\text{\AA}^2 \times 10^3$ ) for joef094a. U(eq) is defined as one third of the trace of the orthogonalized Uij tensor.

|       | x        | y        | z         | U(eq)  |
|-------|----------|----------|-----------|--------|
| Rh(1) | 2566 (1) | 2340 (1) | 2035 (1)  | 24 (1) |
| Rh(2) | 2578 (1) | 2004 (1) | 3351 (1)  | 28 (1) |
| C(1)  | 2085 (2) | 1131 (2) | 2298 (2)  | 33 (1) |
| C(2)  | 1786 (2) | 528 (2)  | 2035 (2)  | 36 (1) |
| C(3)  | 1650 (2) | 41 (2)   | 2668 (2)  | 54 (1) |
| C(4)  | 2234 (3) | -197 (2) | 3073 (3)  | 76 (2) |
| C(5)  | 1317 (3) | -507 (2) | 2282 (3)  | 78 (2) |
| C(6)  | 1198 (3) | 313 (2)  | 3261 (3)  | 71 (2) |
| C(7)  | 1759 (2) | 120 (2)  | 705 (2)   | 36 (1) |
| C(8)  | 2090 (2) | -203 (2) | 67 (2)    | 38 (1) |
| C(9)  | 1744 (2) | -484 (2) | -511 (2)  | 44 (1) |
| C(10) | 2042 (2) | -827 (2) | -1082 (2) | 53 (1) |
| C(11) | 2661 (2) | -855 (2) | -1116 (2) | 54 (1) |
| C(12) | 3036 (2) | -547 (2) | -558 (2)  | 49 (1) |
| C(13) | 2729 (2) | -239 (2) | 71 (2)    | 41 (1) |
| C(14) | 3088 (2) | 13 (2)   | 673 (2)   | 41 (1) |
| C(15) | 3718 (2) | -12 (2)  | 656 (3)   | 53 (1) |
| C(16) | 4019 (2) | -293 (2) | 20 (3)    | 65 (1) |
| C(17) | 3690 (2) | -548 (2) | -559 (3)  | 61 (1) |
| C(18) | 2767 (2) | 280 (2)  | 1355 (2)  | 38 (1) |
| C(19) | 3689 (2) | 1745 (1) | 2502 (2)  | 31 (1) |
| C(20) | 4347 (2) | 1496 (2) | 2379 (2)  | 34 (1) |
| C(21) | 4684 (2) | 1229 (2) | 3103 (2)  | 45 (1) |
| C(22) | 4748 (2) | 1680 (2) | 3764 (2)  | 56 (1) |
| C(23) | 5338 (2) | 1018 (2) | 2859 (3)  | 64 (1) |
| C(24) | 4317 (2) | 662 (2)  | 3371 (3)  | 58 (1) |
| C(25) | 5063 (2) | 1745 (2) | 1316 (2)  | 39 (1) |
| C(26) | 5406 (2) | 2215 (2) | 854 (2)   | 41 (1) |
| C(27) | 5768 (2) | 2028 (2) | 243 (2)   | 48 (1) |
| C(28) | 6050 (2) | 2465 (3) | -248 (3)  | 60 (1) |
| C(29) | 5962 (2) | 3073 (3) | -113 (3)  | 64 (1) |
| C(30) | 5598 (2) | 3287 (2) | 516 (3)   | 53 (1) |
| C(31) | 5318 (2) | 2841 (2) | 1007 (2)  | 42 (1) |
| C(32) | 4939 (2) | 3035 (2) | 1624 (2)  | 43 (1) |
| C(33) | 4832 (2) | 3650 (2) | 1760 (3)  | 54 (1) |
| C(34) | 5111 (3) | 4082 (2) | 1268 (3)  | 71 (1) |
| C(35) | 5479 (2) | 3913 (2) | 680 (3)   | 66 (1) |
| C(36) | 4648 (2) | 2577 (2) | 2144 (2)  | 39 (1) |
| C(37) | 3039 (1) | 3212 (1) | 3140 (2)  | 30 (1) |
| C(38) | 3328 (2) | 3821 (1) | 3402 (2)  | 35 (1) |
| C(39) | 3452 (2) | 3898 (2) | 4296 (2)  | 46 (1) |
| C(40) | 3931 (2) | 3418 (2) | 4540 (3)  | 61 (1) |
| C(41) | 3751 (3) | 4536 (2) | 4423 (3)  | 68 (1) |
| C(42) | 2877 (2) | 3851 (2) | 4797 (2)  | 63 (1) |
| C(43) | 2335 (2) | 4335 (2) | 3091 (2)  | 35 (1) |
| C(44) | 2007 (2) | 4889 (2) | 2792 (2)  | 40 (1) |
| C(45) | 1368 (2) | 4904 (2) | 2810 (3)  | 53 (1) |
| C(46) | 1059 (2) | 5432 (2) | 2562 (3)  | 66 (1) |
| C(47) | 1381 (3) | 5926 (2) | 2306 (3)  | 66 (1) |
| C(48) | 2025 (2) | 5922 (2) | 2259 (2)  | 50 (1) |

|        |           |           |           |         |
|--------|-----------|-----------|-----------|---------|
| C (49) | 2350 (2)  | 5385 (2)  | 2504 (2)  | 40 (1)  |
| C (50) | 2993 (2)  | 5357 (2)  | 2441 (2)  | 41 (1)  |
| C (51) | 3323 (2)  | 5849 (2)  | 2150 (3)  | 57 (1)  |
| C (52) | 3010 (3)  | 6385 (2)  | 1928 (3)  | 70 (1)  |
| C (53) | 2386 (3)  | 6418 (2)  | 1975 (2)  | 65 (1)  |
| C (54) | 3332 (2)  | 4800 (2)  | 2691 (2)  | 38 (1)  |
| C (55) | 1471 (2)  | 2621 (2)  | 2904 (2)  | 33 (1)  |
| C (56) | 849 (2)   | 2936 (2)  | 3020 (2)  | 37 (1)  |
| C (57) | 523 (2)   | 2879 (2)  | 3826 (2)  | 54 (1)  |
| C (58) | 940 (2)   | 3194 (3)  | 4424 (2)  | 69 (2)  |
| C (59) | 378 (3)   | 2226 (3)  | 4075 (3)  | 79 (2)  |
| C (60) | -87 (2)   | 3242 (3)  | 3781 (3)  | 84 (2)  |
| C (61) | 372 (2)   | 2170 (2)  | 2144 (2)  | 41 (1)  |
| C (62) | -72 (2)   | 2030 (2)  | 1515 (2)  | 39 (1)  |
| C (63) | -205 (2)  | 1428 (2)  | 1336 (3)  | 51 (1)  |
| C (64) | -605 (2)  | 1289 (2)  | 719 (3)   | 59 (1)  |
| C (65) | -857 (2)  | 1752 (2)  | 284 (3)   | 54 (1)  |
| C (66) | -733 (2)  | 2367 (2)  | 443 (2)   | 46 (1)  |
| C (67) | -341 (2)  | 2513 (2)  | 1086 (2)  | 41 (1)  |
| C (68) | -200 (2)  | 3124 (2)  | 1256 (2)  | 41 (1)  |
| C (69) | -440 (2)  | 3592 (2)  | 801 (2)   | 48 (1)  |
| C (70) | -819 (2)  | 3451 (2)  | 173 (3)   | 54 (1)  |
| C (71) | -961 (2)  | 2864 (2)  | -11 (2)   | 52 (1)  |
| C (72) | 208 (2)   | 3279 (2)  | 1907 (2)  | 39 (1)  |
| C (73) | 2554 (2)  | 2301 (1)  | 123 (2)   | 32 (1)  |
| C (74) | 2605 (2)  | 1617 (1)  | 115 (2)   | 40 (1)  |
| C (75) | 2406 (2)  | 3185 (2)  | -659 (2)  | 44 (1)  |
| C (76) | 2249 (3)  | 3323 (2)  | -1486 (3) | 81 (2)  |
| C (81) | 1340 (4)  | 2480 (4)  | 6665 (5)  | 108 (2) |
| C (82) | 1857 (5)  | 2875 (6)  | 6363 (5)  | 172 (5) |
| C (83) | 685 (3)   | 1646 (3)  | 6413 (4)  | 98 (2)  |
| C (84) | 678 (5)   | 1094 (4)  | 5937 (7)  | 166 (4) |
| N (1)  | 2118 (2)  | 289 (1)   | 1352 (2)  | 36 (1)  |
| N (2)  | 4712 (1)  | 1957 (1)  | 1941 (2)  | 36 (1)  |
| N (3)  | 2984 (1)  | 4345 (1)  | 3063 (2)  | 33 (1)  |
| N (4)  | 439 (1)   | 2790 (2)  | 2347 (2)  | 38 (1)  |
| O (1)  | 2169 (1)  | 1520 (1)  | 1763 (1)  | 31 (1)  |
| O (2)  | 2201 (1)  | 1203 (1)  | 3007 (1)  | 35 (1)  |
| O (3)  | 1207 (1)  | 218 (1)   | 693 (2)   | 47 (1)  |
| O (4)  | 3050 (1)  | 487 (1)   | 1910 (2)  | 48 (1)  |
| O (5)  | 3432 (1)  | 1976 (1)  | 1907 (1)  | 30 (1)  |
| O (6)  | 3442 (1)  | 1669 (1)  | 3157 (1)  | 33 (1)  |
| O (7)  | 5078 (1)  | 1203 (1)  | 1151 (2)  | 50 (1)  |
| O (8)  | 4352 (1)  | 2722 (1)  | 2711 (2)  | 43 (1)  |
| O (9)  | 2945 (1)  | 3154 (1)  | 2419 (1)  | 30 (1)  |
| O (10) | 2953 (1)  | 2812 (1)  | 3656 (1)  | 33 (1)  |
| O (11) | 2064 (1)  | 3895 (1)  | 3352 (2)  | 43 (1)  |
| O (12) | 3887 (1)  | 4740 (1)  | 2592 (2)  | 52 (1)  |
| O (13) | 1705 (1)  | 2691 (1)  | 2235 (1)  | 31 (1)  |
| O (14) | 1722 (1)  | 2366 (1)  | 3477 (1)  | 36 (1)  |
| O (15) | 671 (1)   | 1777 (1)  | 2475 (2)  | 51 (1)  |
| O (16) | 341 (1)   | 3810 (1)  | 2078 (2)  | 48 (1)  |
| O (17) | 2560 (1)  | 2627 (1)  | 698 (1)   | 31 (1)  |
| O (18) | 2491 (1)  | 2531 (1)  | -590 (1)  | 41 (1)  |
| O (20) | 1095 (2)  | 2549 (3)  | 7289 (3)  | 111 (2) |
| O (21) | 1187 (2)  | 2023 (3)  | 6168 (3)  | 117 (2) |
| O (19) | 2594 (11) | 1675 (14) | 4612 (10) | 47 (1)  |
| C (77) | 2373 (8)  | 1095 (8)  | 4791 (7)  | 94 (4)  |
| C (78) | 2481 (8)  | 1077 (9)  | 5701 (8)  | 114 (5) |
| C (79) | 3208 (7)  | 1140 (7)  | 5510 (8)  | 112 (4) |
| C (80) | 3103 (8)  | 1826 (8)  | 5125 (9)  | 97 (4)  |

|         |           |           |           |         |
|---------|-----------|-----------|-----------|---------|
| O (19') | 2610 (12) | 1710 (15) | 4621 (11) | 47 (1)  |
| C (77') | 2208 (8)  | 1314 (9)  | 4972 (9)  | 94 (4)  |
| C (78') | 2650 (9)  | 909 (9)   | 5503 (10) | 114 (5) |
| C (79') | 3040 (8)  | 1490 (8)  | 5823 (7)  | 112 (4) |
| C (80') | 3226 (8)  | 1627 (10) | 4938 (9)  | 97 (4)  |

---

Table 3. Bond lengths [Å] and angles [deg] for joef094a.

---

|              |            |
|--------------|------------|
| Rh(1)-O(13)  | 2.042(2)   |
| Rh(1)-O(1)   | 2.041(2)   |
| Rh(1)-O(5)   | 2.048(2)   |
| Rh(1)-O(9)   | 2.064(2)   |
| Rh(1)-Rh(2)  | 2.3843(10) |
| Rh(1)-O(17)  | 2.388(2)   |
| Rh(2)-O(10)  | 2.011(2)   |
| Rh(2)-O(2)   | 2.018(2)   |
| Rh(2)-O(14)  | 2.025(2)   |
| Rh(2)-O(6)   | 2.032(2)   |
| Rh(2)-O(19') | 2.282(11)  |
| Rh(2)-O(19)  | 2.290(10)  |
| C(1)-O(2)    | 1.258(4)   |
|              |            |
| C(1)-O(1)    | 1.265(4)   |
| C(1)-C(2)    | 1.536(5)   |
| C(2)-N(1)    | 1.474(5)   |
| C(2)-C(3)    | 1.552(5)   |
| C(3)-C(4)    | 1.534(7)   |
| C(3)-C(6)    | 1.535(7)   |
| C(3)-C(5)    | 1.546(6)   |
| C(7)-O(3)    | 1.214(5)   |
| C(7)-N(1)    | 1.408(5)   |
| C(7)-C(8)    | 1.489(5)   |
| C(8)-C(13)   | 1.384(6)   |
| C(8)-C(9)    | 1.389(5)   |
| C(9)-C(10)   | 1.394(6)   |
| C(10)-C(11)  | 1.342(7)   |
| C(11)-C(12)  | 1.425(6)   |
| C(12)-C(17)  | 1.415(7)   |
| C(12)-C(13)  | 1.438(5)   |
| C(13)-C(14)  | 1.408(5)   |
| C(14)-C(15)  | 1.365(6)   |
| C(14)-C(18)  | 1.484(5)   |
| C(15)-C(16)  | 1.414(6)   |
| C(16)-C(17)  | 1.345(7)   |
| C(18)-O(4)   | 1.223(4)   |
| C(18)-N(1)   | 1.403(5)   |
| C(19)-O(6)   | 1.259(4)   |
| C(19)-O(5)   | 1.270(4)   |
| C(19)-C(20)  | 1.539(5)   |
| C(20)-N(2)   | 1.485(4)   |
| C(20)-C(21)  | 1.558(5)   |
| C(21)-C(22)  | 1.513(6)   |
| C(21)-C(24)  | 1.540(6)   |
| C(21)-C(23)  | 1.547(6)   |
| C(25)-O(7)   | 1.217(4)   |
| C(25)-N(2)   | 1.396(5)   |
| C(25)-C(26)  | 1.495(5)   |
| C(26)-C(27)  | 1.374(5)   |
| C(26)-C(31)  | 1.404(5)   |
| C(27)-C(28)  | 1.414(6)   |
| C(28)-C(29)  | 1.361(8)   |
| C(29)-C(30)  | 1.419(7)   |
| C(30)-C(35)  | 1.419(7)   |
| C(30)-C(31)  | 1.425(6)   |

|                |           |
|----------------|-----------|
| C (31) -C (32) | 1.409 (6) |
| C (32) -C (33) | 1.381 (5) |
| C (32) -C (36) | 1.483 (5) |
| C (33) -C (34) | 1.405 (7) |
| C (34) -C (35) | 1.340 (8) |
| C (36) -O (8)  | 1.210 (4) |
| C (36) -N (2)  | 1.405 (4) |
| C (37) -O (10) | 1.261 (4) |
| C (37) -O (9)  | 1.266 (4) |
| C (37) -C (38) | 1.537 (4) |
| C (38) -N (3)  | 1.485 (4) |
| C (38) -C (39) | 1.572 (5) |
| C (39) -C (42) | 1.517 (6) |
| C (39) -C (40) | 1.532 (6) |
| C (39) -C (41) | 1.551 (6) |
| C (43) -O (11) | 1.212 (4) |
| C (43) -N (3)  | 1.403 (5) |
| C (43) -C (44) | 1.495 (5) |
| C (44) -C (45) | 1.383 (6) |
| C (44) -C (49) | 1.402 (5) |
| C (45) -C (46) | 1.398 (6) |
| C (46) -C (47) | 1.357 (8) |
| <br>           |           |
| C (47) -C (48) | 1.394 (7) |
| C (48) -C (53) | 1.422 (7) |
| C (48) -C (49) | 1.432 (5) |
| C (49) -C (50) | 1.396 (6) |
| C (50) -C (51) | 1.384 (6) |
| C (50) -C (54) | 1.483 (5) |
| C (51) -C (52) | 1.405 (7) |
| C (52) -C (53) | 1.354 (8) |
| C (54) -O (12) | 1.219 (5) |
| C (54) -N (3)  | 1.402 (4) |
| C (55) -O (14) | 1.257 (4) |
| C (55) -O (13) | 1.269 (4) |
| C (55) -C (56) | 1.524 (4) |
| C (56) -N (4)  | 1.494 (5) |
| C (56) -C (57) | 1.564 (5) |
| C (57) -C (59) | 1.521 (8) |
| C (57) -C (58) | 1.532 (7) |
| C (57) -C (60) | 1.541 (6) |
| C (61) -O (15) | 1.217 (4) |
| C (61) -N (4)  | 1.405 (5) |
| C (61) -C (62) | 1.481 (5) |
| C (62) -C (63) | 1.381 (6) |
| C (62) -C (67) | 1.413 (5) |
| C (63) -C (64) | 1.404 (6) |
| C (64) -C (65) | 1.372 (7) |
| C (65) -C (66) | 1.395 (6) |
| C (66) -C (67) | 1.429 (5) |
| C (66) -C (71) | 1.427 (6) |
| C (67) -C (68) | 1.399 (6) |
| C (68) -C (69) | 1.388 (5) |
| C (68) -C (72) | 1.468 (5) |
| C (69) -C (70) | 1.394 (6) |
| C (70) -C (71) | 1.354 (7) |
| C (72) -O (16) | 1.231 (5) |
| C (72) -N (4)  | 1.401 (5) |
| C (73) -O (17) | 1.219 (3) |
| C (73) -O (18) | 1.335 (3) |



|                    |           |
|--------------------|-----------|
| C(73)-C(74)        | 1.498(4)  |
| C(75)-O(18)        | 1.445(4)  |
| C(75)-C(76)        | 1.497(5)  |
| C(81)-O(20)        | 1.207(9)  |
| C(81)-O(21)        | 1.357(10) |
| C(81)-C(82)        | 1.505(11) |
| C(83)-O(21)        | 1.425(8)  |
| C(83)-C(84)        | 1.458(11) |
| O(19)-C(77)        | 1.388(16) |
| O(19)-C(80)        | 1.450(14) |
| C(77)-C(78)        | 1.586(15) |
| C(78)-C(79)        | 1.611(18) |
| C(79)-C(80)        | 1.654(16) |
| O(19')-C(77')      | 1.368(14) |
| O(19')-C(80')      | 1.451(17) |
| C(77')-C(78')      | 1.592(17) |
| C(78')-C(79')      | 1.619(18) |
| C(79')-C(80')      | 1.606(15) |
|                    |           |
| O(13)-Rh(1)-O(1)   | 89.13(9)  |
| O(13)-Rh(1)-O(5)   | 176.39(9) |
| O(1)-Rh(1)-O(5)    | 91.03(9)  |
| O(13)-Rh(1)-O(9)   | 89.22(9)  |
| O(1)-Rh(1)-O(9)    | 174.51(8) |
| O(5)-Rh(1)-O(9)    | 90.29(9)  |
| O(13)-Rh(1)-Rh(2)  | 88.03(6)  |
| O(1)-Rh(1)-Rh(2)   | 87.28(6)  |
| O(5)-Rh(1)-Rh(2)   | 88.38(6)  |
| O(9)-Rh(1)-Rh(2)   | 87.43(6)  |
| O(13)-Rh(1)-O(17)  | 93.42(8)  |
| O(1)-Rh(1)-O(17)   | 90.37(8)  |
| O(5)-Rh(1)-O(17)   | 90.18(8)  |
| O(9)-Rh(1)-O(17)   | 94.95(8)  |
| Rh(2)-Rh(1)-O(17)  | 177.22(5) |
| O(10)-Rh(2)-O(2)   | 178.10(9) |
| O(10)-Rh(2)-O(14)  | 89.88(10) |
| O(2)-Rh(2)-O(14)   | 89.97(10) |
| O(10)-Rh(2)-O(6)   | 89.36(10) |
| O(2)-Rh(2)-O(6)    | 90.67(10) |
| O(14)-Rh(2)-O(6)   | 176.30(9) |
| O(10)-Rh(2)-O(19') | 89.0(7)   |
| O(2)-Rh(2)-O(19')  | 92.9(7)   |
| O(14)-Rh(2)-O(19') | 91.9(9)   |
| O(6)-Rh(2)-O(19')  | 91.7(9)   |
| O(10)-Rh(2)-O(19)  | 91.2(7)   |
| O(2)-Rh(2)-O(19)   | 90.7(7)   |
| O(14)-Rh(2)-O(19)  | 91.9(8)   |
| O(6)-Rh(2)-O(19)   | 91.7(8)   |
| O(19')-Rh(2)-O(19) | 2.1(13)   |
| O(10)-Rh(2)-Rh(1)  | 89.05(6)  |
| O(2)-Rh(2)-Rh(1)   | 89.05(7)  |
| O(14)-Rh(2)-Rh(1)  | 88.38(6)  |
| O(6)-Rh(2)-Rh(1)   | 87.99(6)  |
| O(19')-Rh(2)-Rh(1) | 178.1(6)  |
| O(19)-Rh(2)-Rh(1)  | 179.6(10) |
| O(2)-C(1)-O(1)     | 126.7(3)  |
| O(2)-C(1)-C(2)     | 118.5(3)  |
| O(1)-C(1)-C(2)     | 114.8(3)  |
| N(1)-C(2)-C(1)     | 109.5(3)  |
| N(1)-C(2)-C(3)     | 114.3(3)  |
| C(1)-C(2)-C(3)     | 117.4(3)  |

|                       |          |
|-----------------------|----------|
| C(4) - C(3) - C(6)    | 110.6(4) |
| C(4) - C(3) - C(5)    | 108.5(4) |
| C(6) - C(3) - C(5)    | 106.9(4) |
| C(4) - C(3) - C(2)    | 113.3(4) |
| C(6) - C(3) - C(2)    | 108.9(4) |
| C(5) - C(3) - C(2)    | 108.4(3) |
| O(3) - C(7) - N(1)    | 120.6(3) |
| O(3) - C(7) - C(8)    | 123.0(3) |
| N(1) - C(7) - C(8)    | 116.4(3) |
| C(13) - C(8) - C(9)   | 121.1(4) |
| C(13) - C(8) - C(7)   | 120.2(3) |
| C(9) - C(8) - C(7)    | 118.7(4) |
| C(8) - C(9) - C(10)   | 119.7(4) |
| C(11) - C(10) - C(9)  | 121.0(4) |
| C(10) - C(11) - C(12) | 121.1(4) |
| C(17) - C(12) - C(11) | 124.5(4) |
| C(17) - C(12) - C(13) | 117.6(4) |
| C(11) - C(12) - C(13) | 117.8(4) |
| C(8) - C(13) - C(14)  | 122.1(4) |
| C(8) - C(13) - C(12)  | 118.9(4) |
| C(14) - C(13) - C(12) | 119.0(4) |
| C(15) - C(14) - C(13) | 121.2(4) |
| C(15) - C(14) - C(18) | 120.1(4) |
| C(13) - C(14) - C(18) | 118.6(3) |
| C(14) - C(15) - C(16) | 119.5(5) |
| C(17) - C(16) - C(15) | 120.8(5) |
| C(16) - C(17) - C(12) | 121.8(4) |
| O(4) - C(18) - N(1)   | 119.8(4) |
| O(4) - C(18) - C(14)  | 122.1(4) |
| N(1) - C(18) - C(14)  | 118.1(3) |
| O(6) - C(19) - O(5)   | 126.2(3) |
| O(6) - C(19) - C(20)  | 118.1(3) |
| O(5) - C(19) - C(20)  | 115.6(3) |
| N(2) - C(20) - C(19)  | 108.9(3) |
| N(2) - C(20) - C(21)  | 114.4(3) |
| C(19) - C(20) - C(21) | 117.0(3) |
| C(22) - C(21) - C(24) | 110.2(4) |
| C(22) - C(21) - C(23) | 108.3(4) |
| C(24) - C(21) - C(23) | 108.2(3) |
| C(22) - C(21) - C(20) | 113.7(3) |
| C(24) - C(21) - C(20) | 107.5(3) |
| C(23) - C(21) - C(20) | 108.8(3) |
| O(7) - C(25) - N(2)   | 121.1(3) |
| O(7) - C(25) - C(26)  | 122.0(3) |
| N(2) - C(25) - C(26)  | 117.0(3) |
| C(27) - C(26) - C(31) | 120.7(4) |
| C(27) - C(26) - C(25) | 119.1(4) |
| C(31) - C(26) - C(25) | 120.0(3) |
| C(26) - C(27) - C(28) | 120.2(4) |
| C(29) - C(28) - C(27) | 119.7(4) |
| C(28) - C(29) - C(30) | 121.9(4) |
| C(35) - C(30) - C(31) | 117.5(4) |
| C(35) - C(30) - C(29) | 124.8(4) |
| C(31) - C(30) - C(29) | 117.7(4) |
| C(26) - C(31) - C(32) | 120.9(3) |
| C(26) - C(31) - C(30) | 119.8(4) |
| C(32) - C(31) - C(30) | 119.3(4) |
| C(33) - C(32) - C(31) | 121.2(4) |
| C(33) - C(32) - C(36) | 118.7(4) |
| C(31) - C(32) - C(36) | 120.0(3) |
| C(32) - C(33) - C(34) | 118.5(5) |

|                   |          |
|-------------------|----------|
| C(35)-C(34)-C(33) | 121.8(4) |
| C(34)-C(35)-C(30) | 121.6(4) |
| O(8)-C(36)-N(2)   | 120.4(3) |
| O(8)-C(36)-C(32)  | 122.4(3) |
| N(2)-C(36)-C(32)  | 117.2(3) |
| O(10)-C(37)-O(9)  | 126.8(3) |
| O(10)-C(37)-C(38) | 116.9(3) |
| O(9)-C(37)-C(38)  | 116.2(3) |
| N(3)-C(38)-C(37)  | 110.2(3) |
| N(3)-C(38)-C(39)  | 112.9(3) |
| C(37)-C(38)-C(39) | 116.7(3) |
| C(42)-C(39)-C(40) | 110.6(4) |
| C(42)-C(39)-C(41) | 108.8(4) |
| C(40)-C(39)-C(41) | 107.0(4) |
| C(42)-C(39)-C(38) | 114.3(3) |
| C(40)-C(39)-C(38) | 108.2(3) |
| C(41)-C(39)-C(38) | 107.8(3) |
| O(11)-C(43)-N(3)  | 120.5(3) |
| O(11)-C(43)-C(44) | 122.7(3) |
| N(3)-C(43)-C(44)  | 116.8(3) |
| C(45)-C(44)-C(49) | 121.2(4) |
| C(45)-C(44)-C(43) | 119.1(4) |
| C(49)-C(44)-C(43) | 119.6(3) |
| C(44)-C(45)-C(46) | 119.3(5) |
| C(47)-C(46)-C(45) | 120.6(5) |
| C(46)-C(47)-C(48) | 121.8(4) |
| C(47)-C(48)-C(53) | 124.4(4) |
| C(47)-C(48)-C(49) | 118.5(4) |
| C(53)-C(48)-C(49) | 117.1(4) |
| C(50)-C(49)-C(44) | 121.4(3) |
| C(50)-C(49)-C(48) | 120.1(4) |
| C(44)-C(49)-C(48) | 118.5(4) |
| C(51)-C(50)-C(49) | 120.6(4) |
| C(51)-C(50)-C(54) | 119.1(4) |
| C(49)-C(50)-C(54) | 120.4(3) |
| C(50)-C(51)-C(52) | 119.8(5) |
| C(53)-C(52)-C(51) | 120.4(5) |
| C(52)-C(53)-C(48) | 122.0(4) |
| O(12)-C(54)-N(3)  | 121.1(3) |
| O(12)-C(54)-C(50) | 122.3(3) |
| N(3)-C(54)-C(50)  | 116.6(3) |
| O(14)-C(55)-O(13) | 126.6(3) |
| O(14)-C(55)-C(56) | 118.6(3) |
| O(13)-C(55)-C(56) | 114.5(3) |
| N(4)-C(56)-C(55)  | 109.1(3) |
| N(4)-C(56)-C(57)  | 113.9(3) |
| C(55)-C(56)-C(57) | 118.6(3) |
| C(59)-C(57)-C(58) | 110.6(4) |
| C(59)-C(57)-C(60) | 108.7(4) |
| C(58)-C(57)-C(60) | 107.8(4) |
| C(59)-C(57)-C(56) | 114.7(4) |
| C(58)-C(57)-C(56) | 107.2(3) |
| C(60)-C(57)-C(56) | 107.5(4) |
| O(15)-C(61)-N(4)  | 120.5(3) |
| O(15)-C(61)-C(62) | 122.9(4) |
| N(4)-C(61)-C(62)  | 116.7(3) |
| C(63)-C(62)-C(67) | 120.5(4) |
| C(63)-C(62)-C(61) | 119.7(4) |
| C(67)-C(62)-C(61) | 119.8(3) |
| C(62)-C(63)-C(64) | 120.2(4) |
| C(65)-C(64)-C(63) | 120.0(4) |

|                          |            |
|--------------------------|------------|
| C(64) - C(65) - C(66)    | 121.7(4)   |
| C(65) - C(66) - C(67)    | 118.7(4)   |
| C(65) - C(66) - C(71)    | 123.8(4)   |
| C(67) - C(66) - C(71)    | 117.4(4)   |
| C(68) - C(67) - C(62)    | 120.8(3)   |
| C(68) - C(67) - C(66)    | 120.2(4)   |
| C(62) - C(67) - C(66)    | 118.9(4)   |
| C(69) - C(68) - C(67)    | 120.2(4)   |
| C(69) - C(68) - C(72)    | 119.1(4)   |
| C(67) - C(68) - C(72)    | 120.7(3)   |
| C(68) - C(69) - C(70)    | 119.6(4)   |
| C(71) - C(70) - C(69)    | 121.7(4)   |
| C(70) - C(71) - C(66)    | 120.8(4)   |
| O(16) - C(72) - N(4)     | 120.3(3)   |
| O(16) - C(72) - C(68)    | 122.7(3)   |
| N(4) - C(72) - C(68)     | 117.0(3)   |
| O(17) - C(73) - O(18)    | 122.0(3)   |
| O(17) - C(73) - C(74)    | 126.1(3)   |
| O(18) - C(73) - C(74)    | 111.9(3)   |
| O(18) - C(75) - C(76)    | 107.8(3)   |
| O(20) - C(81) - O(21)    | 123.1(8)   |
| O(20) - C(81) - C(82)    | 124.3(9)   |
| O(21) - C(81) - C(82)    | 112.6(8)   |
| O(21) - C(83) - C(84)    | 108.6(7)   |
| C(18) - N(1) - C(7)      | 123.4(3)   |
| C(18) - N(1) - C(2)      | 119.3(3)   |
| C(7) - N(1) - C(2)       | 117.2(3)   |
| C(25) - N(2) - C(36)     | 124.4(3)   |
| C(25) - N(2) - C(20)     | 117.3(3)   |
| C(36) - N(2) - C(20)     | 118.2(3)   |
| C(54) - N(3) - C(43)     | 124.3(3)   |
| C(54) - N(3) - C(38)     | 117.1(3)   |
| C(43) - N(3) - C(38)     | 118.4(3)   |
| C(61) - N(4) - C(72)     | 124.1(3)   |
| C(61) - N(4) - C(56)     | 117.4(3)   |
| C(72) - N(4) - C(56)     | 118.1(3)   |
| C(1) - O(1) - Rh(1)      | 118.8(2)   |
| C(1) - O(2) - Rh(2)      | 118.2(2)   |
| C(19) - O(5) - Rh(1)     | 117.8(2)   |
| C(19) - O(6) - Rh(2)     | 119.4(2)   |
| C(37) - O(9) - Rh(1)     | 117.7(2)   |
| C(37) - O(10) - Rh(2)    | 118.8(2)   |
| C(55) - O(13) - Rh(1)    | 118.1(2)   |
| C(55) - O(14) - Rh(2)    | 118.9(2)   |
| C(73) - O(17) - Rh(1)    | 129.13(19) |
| C(73) - O(18) - C(75)    | 117.4(2)   |
| C(81) - O(21) - C(83)    | 115.0(6)   |
| C(77) - O(19) - C(80)    | 109.5(11)  |
| C(77) - O(19) - Rh(2)    | 119.5(15)  |
| C(80) - O(19) - Rh(2)    | 121.2(10)  |
| O(19) - C(77) - C(78)    | 101.0(12)  |
| C(77) - C(78) - C(79)    | 86.5(12)   |
| C(80) - C(79) - C(78)    | 91.5(11)   |
| O(19) - C(80) - C(79)    | 98.2(14)   |
| C(77') - O(19') - C(80') | 109.7(12)  |
| C(77') - O(19') - Rh(2)  | 125.6(12)  |
| C(80') - O(19') - Rh(2)  | 115.1(15)  |
| O(19') - C(77') - C(78') | 102.9(15)  |
| C(77') - C(78') - C(79') | 94.3(12)   |
| C(80') - C(79') - C(78') | 87.3(12)   |
| O(19') - C(80') - C(79') | 98.7(12)   |

---

Symmetry transformations used to generate equivalent atoms:

Table 4. Anisotropic displacement parameters ( $\text{\AA}^2 \times 10^3$ ) for joef094a.  
 The anisotropic displacement factor exponent takes the form:  
 $-2 \pi^2 [ h^2 a^{*2} U_{11} + \dots + 2 h k a^* b^* U_{12} ]$

|       | U11    | U22    | U33   | U23    | U13    | U12    |
|-------|--------|--------|-------|--------|--------|--------|
| Rh(1) | 28(1)  | 26(1)  | 20(1) | 0(1)   | -1(1)  | 1(1)   |
| Rh(2) | 34(1)  | 29(1)  | 20(1) | 1(1)   | -1(1)  | 2(1)   |
| C(1)  | 36(2)  | 34(2)  | 29(2) | 1(1)   | 3(1)   | -2(1)  |
| C(2)  | 50(2)  | 33(2)  | 25(2) | 1(1)   | 2(2)   | -8(1)  |
| C(3)  | 85(3)  | 42(2)  | 35(2) | 6(2)   | -2(2)  | -20(2) |
| C(4)  | 134(5) | 50(2)  | 46(2) | 21(2)  | -15(3) | -13(3) |
| C(5)  | 131(5) | 53(3)  | 49(3) | 5(2)   | 4(3)   | -46(3) |
| C(6)  | 91(4)  | 78(3)  | 45(2) | 3(2)   | 14(2)  | -39(3) |
| C(7)  | 52(2)  | 26(2)  | 30(2) | 1(1)   | -4(2)  | -5(1)  |
| C(8)  | 65(2)  | 24(2)  | 26(2) | 5(1)   | -3(2)  | -3(2)  |
| C(9)  | 65(3)  | 37(2)  | 30(2) | 4(2)   | -5(2)  | -5(2)  |
| C(10) | 97(4)  | 37(2)  | 26(2) | -1(2)  | -2(2)  | -5(2)  |
| C(11) | 96(4)  | 37(2)  | 29(2) | 6(1)   | 7(2)   | 5(2)   |
| C(12) | 78(3)  | 33(2)  | 37(2) | 5(2)   | 13(2)  | 10(2)  |
| C(13) | 64(3)  | 26(2)  | 32(2) | 3(1)   | 2(2)   | 5(2)   |
| C(14) | 49(2)  | 29(2)  | 44(2) | 2(2)   | 1(2)   | 2(2)   |
| C(15) | 54(2)  | 45(2)  | 61(3) | 1(2)   | 2(2)   | 6(2)   |
| C(16) | 58(3)  | 58(3)  | 78(3) | 6(3)   | 16(2)  | 15(2)  |
| C(17) | 79(3)  | 48(2)  | 58(3) | 3(2)   | 17(2)  | 17(2)  |
| C(18) | 47(2)  | 29(2)  | 37(2) | -1(1)  | -5(2)  | -1(1)  |
| C(19) | 33(2)  | 25(1)  | 35(2) | -3(1)  | -4(1)  | 2(1)   |
| C(20) | 34(2)  | 30(2)  | 38(2) | 2(1)   | -1(1)  | 6(1)   |
| C(21) | 46(2)  | 45(2)  | 44(2) | 10(2)  | -7(2)  | 12(2)  |
| C(22) | 55(2)  | 69(3)  | 45(2) | 2(2)   | -21(2) | 8(2)   |
| C(23) | 47(2)  | 75(3)  | 71(3) | 15(3)  | -7(2)  | 24(2)  |
| C(24) | 63(3)  | 47(2)  | 62(3) | 18(2)  | -4(2)  | 10(2)  |
| C(25) | 33(2)  | 41(2)  | 42(2) | 0(2)   | -2(1)  | 9(1)   |
| C(26) | 27(2)  | 53(2)  | 43(2) | 6(2)   | -4(1)  | 2(1)   |
| C(27) | 29(2)  | 66(3)  | 49(2) | 2(2)   | -2(2)  | 3(2)   |
| C(28) | 27(2)  | 102(4) | 52(2) | 6(3)   | -5(2)  | -6(2)  |
| C(29) | 38(2)  | 95(4)  | 59(3) | 23(3)  | -8(2)  | -22(2) |
| C(30) | 41(2)  | 64(3)  | 55(2) | 16(2)  | -12(2) | -13(2) |
| C(31) | 31(2)  | 48(2)  | 47(2) | 6(2)   | -10(2) | -3(1)  |
| C(32) | 39(2)  | 38(2)  | 51(2) | 0(2)   | -10(2) | -2(2)  |
| C(33) | 61(3)  | 36(2)  | 66(3) | 3(2)   | -5(2)  | -2(2)  |
| C(34) | 85(4)  | 40(2)  | 87(4) | 9(2)   | -12(3) | -6(2)  |
| C(35) | 72(3)  | 53(3)  | 73(3) | 19(2)  | -10(3) | -24(2) |
| C(36) | 33(2)  | 35(2)  | 48(2) | -2(2)  | -7(2)  | 4(1)   |
| C(37) | 28(1)  | 31(2)  | 30(2) | -3(1)  | -2(1)  | 7(1)   |
| C(38) | 36(2)  | 29(2)  | 38(2) | -5(1)  | -6(2)  | 3(1)   |
| C(39) | 61(2)  | 40(2)  | 38(2) | -7(2)  | -18(2) | 0(2)   |
| C(40) | 71(3)  | 55(3)  | 57(3) | -1(2)  | -33(2) | 3(2)   |
| C(41) | 103(4) | 46(2)  | 55(3) | -14(2) | -36(3) | -4(2)  |
| C(42) | 88(3)  | 71(3)  | 30(2) | -14(2) | 0(2)   | 13(3)  |
| C(43) | 40(2)  | 34(2)  | 32(2) | -6(1)  | -2(1)  | 4(1)   |
| C(44) | 48(2)  | 36(2)  | 37(2) | -8(1)  | -4(2)  | 9(2)   |
| C(45) | 48(2)  | 46(2)  | 65(3) | -10(2) | -7(2)  | 13(2)  |
| C(46) | 54(3)  | 66(3)  | 77(3) | -12(3) | -19(2) | 23(2)  |
| C(47) | 89(4)  | 56(3)  | 55(3) | -5(2)  | -24(3) | 34(3)  |
| C(48) | 76(3)  | 42(2)  | 33(2) | -4(2)  | -11(2) | 17(2)  |
| C(49) | 55(2)  | 34(2)  | 29(2) | -5(1)  | -9(2)  | 9(2)   |

|        |        |         |         |        |        |        |
|--------|--------|---------|---------|--------|--------|--------|
| C(50)  | 61(2)  | 33(2)   | 30(2)   | -4(1)  | -1(2)  | -1(2)  |
| C(51)  | 80(3)  | 43(2)   | 49(2)   | 0(2)   | 8(2)   | -6(2)  |
| C(52)  | 113(5) | 42(2)   | 53(3)   | 4(2)   | 7(3)   | -7(3)  |
| C(53)  | 116(4) | 37(2)   | 42(2)   | 9(2)   | -4(3)  | 15(2)  |
| C(54)  | 46(2)  | 31(2)   | 36(2)   | -5(1)  | -1(2)  | -5(2)  |
| C(55)  | 35(2)  | 35(2)   | 29(2)   | -2(1)  | 1(1)   | -1(1)  |
| C(56)  | 33(2)  | 46(2)   | 31(2)   | -3(2)  | 3(1)   | 2(1)   |
| C(57)  | 39(2)  | 86(3)   | 36(2)   | -3(2)  | 11(2)  | 8(2)   |
| C(58)  | 56(3)  | 118(5)  | 34(2)   | -10(3) | 6(2)   | 18(3)  |
| C(59)  | 65(3)  | 120(5)  | 53(3)   | 18(3)  | 20(2)  | -5(3)  |
| C(60)  | 46(3)  | 153(6)  | 51(3)   | -5(3)  | 16(2)  | 31(3)  |
| C(61)  | 33(2)  | 49(2)   | 41(2)   | 9(2)   | 2(1)   | -6(1)  |
| C(62)  | 33(2)  | 44(2)   | 41(2)   | 4(2)   | 4(1)   | -9(2)  |
| C(63)  | 46(2)  | 54(2)   | 53(2)   | 9(2)   | -3(2)  | -18(2) |
| C(64)  | 61(3)  | 59(3)   | 57(3)   | 1(2)   | 3(2)   | -26(2) |
| C(65)  | 40(2)  | 76(3)   | 46(2)   | 1(2)   | 2(2)   | -19(2) |
| C(66)  | 29(2)  | 67(3)   | 41(2)   | 1(2)   | 3(1)   | -7(2)  |
| C(67)  | 25(2)  | 59(2)   | 40(2)   | 3(2)   | 5(1)   | -4(1)  |
| C(68)  | 30(2)  | 51(2)   | 41(2)   | 2(2)   | 5(1)   | 4(1)   |
| C(69)  | 38(2)  | 55(2)   | 50(2)   | 2(2)   | 4(2)   | 7(2)   |
| C(70)  | 38(2)  | 74(3)   | 49(2)   | 14(2)  | 1(2)   | 13(2)  |
| C(71)  | 32(2)  | 83(3)   | 39(2)   | 3(2)   | -3(2)  | -1(2)  |
| C(72)  | 29(2)  | 45(2)   | 43(2)   | 4(2)   | 5(1)   | 6(1)   |
| C(73)  | 31(2)  | 39(2)   | 28(1)   | 3(1)   | 1(1)   | -2(1)  |
| C(74)  | 46(2)  | 34(2)   | 41(2)   | 1(1)   | 8(2)   | 0(2)   |
| C(75)  | 58(2)  | 36(2)   | 38(2)   | 3(1)   | -8(2)  | 0(2)   |
| C(76)  | 149(6) | 50(2)   | 45(2)   | 12(2)  | -18(3) | -2(3)  |
| C(81)  | 101(5) | 139(7)  | 84(5)   | 18(5)  | -22(4) | 19(5)  |
| C(82)  | 147(8) | 264(13) | 105(6)  | 59(8)  | 6(6)   | -70(9) |
| C(83)  | 99(5)  | 98(5)   | 98(5)   | 17(4)  | 16(4)  | 21(4)  |
| C(84)  | 158(9) | 107(6)  | 233(12) | -14(8) | 7(9)   | 55(6)  |
| N(1)   | 49(2)  | 28(1)   | 30(2)   | 1(1)   | 0(1)   | -6(1)  |
| N(2)   | 31(1)  | 35(1)   | 41(2)   | 0(1)   | -1(1)  | 4(1)   |
| N(3)   | 37(1)  | 28(1)   | 33(1)   | -3(1)  | -1(1)  | 3(1)   |
| N(4)   | 29(1)  | 47(2)   | 37(2)   | 2(1)   | 1(1)   | 3(1)   |
| O(1)   | 34(1)  | 31(1)   | 27(1)   | 0(1)   | -1(1)  | -5(1)  |
| O(2)   | 49(1)  | 33(1)   | 24(1)   | 3(1)   | -1(1)  | -5(1)  |
| O(3)   | 48(2)  | 49(2)   | 43(2)   | -5(1)  | -6(1)  | -3(1)  |
| O(4)   | 52(2)  | 47(2)   | 44(2)   | -7(1)  | -10(1) | 3(1)   |
| O(5)   | 33(1)  | 30(1)   | 28(1)   | -1(1)  | -2(1)  | 5(1)   |
| O(6)   | 38(1)  | 32(1)   | 28(1)   | 2(1)   | -2(1)  | 7(1)   |
| O(7)   | 55(2)  | 41(1)   | 56(2)   | -2(1)  | 9(1)   | 12(1)  |
| O(8)   | 43(1)  | 38(1)   | 48(2)   | -9(1)  | 0(1)   | 3(1)   |
| O(9)   | 36(1)  | 29(1)   | 26(1)   | 1(1)   | -2(1)  | 1(1)   |
| O(10)  | 44(1)  | 29(1)   | 25(1)   | 0(1)   | -3(1)  | 3(1)   |
| O(11)  | 39(1)  | 37(1)   | 51(2)   | -2(1)  | 5(1)   | 1(1)   |
| O(12)  | 45(2)  | 44(2)   | 68(2)   | 0(1)   | 3(1)   | -7(1)  |
| O(13)  | 29(1)  | 37(1)   | 27(1)   | 0(1)   | 0(1)   | 3(1)   |
| O(14)  | 34(1)  | 45(1)   | 28(1)   | 1(1)   | 3(1)   | 3(1)   |
| O(15)  | 51(2)  | 45(2)   | 59(2)   | 13(1)  | -9(1)  | -3(1)  |
| O(16)  | 48(2)  | 40(1)   | 57(2)   | -3(1)  | -6(1)  | 5(1)   |
| O(17)  | 31(1)  | 35(1)   | 26(1)   | 2(1)   | 0(1)   | -2(1)  |
| O(18)  | 58(2)  | 35(1)   | 31(1)   | 0(1)   | 3(1)   | -2(1)  |
| O(20)  | 105(3) | 138(4)  | 88(3)   | -3(3)  | 9(3)   | 13(3)  |
| O(21)  | 99(4)  | 165(5)  | 88(3)   | 15(4)  | 7(3)   | 32(4)  |
| O(19)  | 53(2)  | 59(3)   | 30(1)   | 10(1)  | -5(1)  | -2(2)  |
| C(77)  | 126(7) | 110(9)  | 47(5)   | 26(5)  | -9(5)  | -38(6) |
| C(78)  | 150(8) | 122(9)  | 69(6)   | 51(6)  | -19(6) | -33(7) |
| C(79)  | 132(7) | 147(9)  | 58(6)   | 41(6)  | -28(5) | -12(7) |
| C(80)  | 95(6)  | 152(9)  | 43(6)   | 28(6)  | -12(5) | -25(6) |
| O(19') | 53(2)  | 59(3)   | 30(1)   | 10(1)  | -5(1)  | -2(2)  |

|         |         |         |        |        |         |         |
|---------|---------|---------|--------|--------|---------|---------|
| C (77') | 126 (7) | 110 (9) | 47 (5) | 26 (5) | -9 (5)  | -38 (6) |
| C (78') | 150 (8) | 122 (9) | 69 (6) | 51 (6) | -19 (6) | -33 (7) |
| C (79') | 132 (7) | 147 (9) | 58 (6) | 41 (6) | -28 (5) | -12 (7) |
| C (80') | 95 (6)  | 152 (9) | 43 (6) | 28 (6) | -12 (5) | -25 (6) |

---



Table 5. Hydrogen coordinates ( $\times 10^4$ ) and isotropic displacement parameters ( $\text{\AA}^2 \times 10^3$ ) for joef094a.

|        | x    | y     | z     | U(eq) |
|--------|------|-------|-------|-------|
| H(2A)  | 1370 | 649   | 1834  | 43    |
| H(4A)  | 2117 | -470  | 3500  | 115   |
| H(4B)  | 2471 | 150   | 3279  | 115   |
| H(4C)  | 2489 | -423  | 2700  | 115   |
| H(5A)  | 1214 | -813  | 2677  | 117   |
| H(5B)  | 1590 | -692  | 1892  | 117   |
| H(5C)  | 937  | -364  | 2031  | 117   |
| H(6A)  | 1068 | -6    | 3626  | 107   |
| H(6B)  | 835  | 476   | 2991  | 107   |
| H(6C)  | 1403 | 645   | 3547  | 107   |
| H(9A)  | 1307 | -443  | -517  | 53    |
| H(10A) | 1802 | -1045 | -1453 | 64    |
| H(11A) | 2853 | -1084 | -1518 | 65    |
| H(15A) | 3954 | 158   | 1068  | 64    |
| H(16A) | 4458 | -302  | 1     | 78    |
| H(17A) | 3903 | -734  | -979  | 74    |
| H(20A) | 4298 | 1142  | 2016  | 41    |
| H(22A) | 5019 | 2017  | 3605  | 84    |
| H(22B) | 4927 | 1472  | 4216  | 84    |
| H(22C) | 4340 | 1843  | 3901  | 84    |
| H(23A) | 5583 | 1374  | 2701  | 97    |
| H(23B) | 5306 | 731   | 2424  | 97    |
| H(23C) | 5541 | 814   | 3298  | 97    |
| H(24A) | 3912 | 790   | 3567  | 86    |
| H(24B) | 4546 | 452   | 3784  | 86    |
| H(24C) | 4261 | 382   | 2932  | 86    |
| H(27A) | 5829 | 1603  | 150   | 58    |
| H(28A) | 6300 | 2335  | -670  | 72    |
| H(29A) | 6150 | 3363  | -449  | 77    |
| H(33A) | 4575 | 3777  | 2177  | 65    |
| H(34A) | 5036 | 4506  | 1353  | 85    |
| H(35A) | 5665 | 4220  | 366   | 79    |
| H(38A) | 3746 | 3833  | 3153  | 41    |
| H(40A) | 4056 | 3493  | 5078  | 92    |
| H(40B) | 4294 | 3447  | 4201  | 92    |
| H(40C) | 3750 | 3008  | 4497  | 92    |
| H(41A) | 3874 | 4578  | 4967  | 102   |
| H(41B) | 3452 | 4857  | 4292  | 102   |
| H(41C) | 4116 | 4576  | 4090  | 102   |
| H(42A) | 2996 | 3865  | 5345  | 94    |
| H(42B) | 2665 | 3464  | 4688  | 94    |
| H(42C) | 2600 | 4194  | 4681  | 94    |
| H(45A) | 1141 | 4559  | 2988  | 64    |
| H(46A) | 620  | 5445  | 2573  | 79    |
| H(47A) | 1162 | 6283  | 2155  | 80    |
| H(51A) | 3760 | 5824  | 2100  | 69    |
| H(52A) | 3238 | 6728  | 1744  | 83    |
| H(53A) | 2184 | 6782  | 1813  | 78    |
| H(56A) | 941  | 3383  | 2965  | 44    |
| H(58A) | 727  | 3209  | 4926  | 104   |
| H(58B) | 1032 | 3611  | 4251  | 104   |
| H(58C) | 1325 | 2962  | 4477  | 104   |

|         |       |      |       |     |
|---------|-------|------|-------|-----|
| H (59A) | 241   | 2225 | 4617  | 119 |
| H (59B) | 750   | 1972 | 4023  | 119 |
| H (59C) | 49    | 2059 | 3745  | 119 |
| H (60A) | -266  | 3278 | 4301  | 125 |
| H (60B) | -378  | 3028 | 3440  | 125 |
| H (60C) | -5    | 3652 | 3573  | 125 |
| H (63A) | -26   | 1106 | 1632  | 61  |
| H (64A) | -702  | 874  | 603   | 71  |
| H (65A) | -1122 | 1652 | -136  | 65  |
| H (69A) | -345  | 4007 | 918   | 57  |
| H (70A) | -983  | 3774 | -134  | 65  |
| H (71A) | -1215 | 2783 | -449  | 62  |
| H (74A) | 2844  | 1481 | 566   | 60  |
| H (74B) | 2813  | 1486 | -362  | 60  |
| H (74C) | 2190  | 1436 | 135   | 60  |
| H (75A) | 2790  | 3402 | -508  | 53  |
| H (75B) | 2068  | 3323 | -313  | 53  |
| H (76A) | 2188  | 3765 | -1549 | 122 |
| H (76B) | 1868  | 3107 | -1628 | 122 |
| H (76C) | 2587  | 3187 | -1823 | 122 |
| H (82A) | 1805  | 3295 | 6555  | 258 |
| H (82B) | 1848  | 2876 | 5795  | 258 |
| H (82C) | 2254  | 2712 | 6543  | 258 |
| H (83A) | 290   | 1870 | 6354  | 118 |
| H (83B) | 736   | 1535 | 6966  | 118 |
| H (84A) | 422   | 781  | 6188  | 249 |
| H (84B) | 1101  | 939  | 5877  | 249 |
| H (84C) | 506   | 1190 | 5425  | 249 |
| H (77A) | 2612  | 771  | 4523  | 113 |
| H (77B) | 1930  | 1053 | 4659  | 113 |
| H (78A) | 2364  | 685  | 5949  | 137 |
| H (78B) | 2304  | 1431 | 5983  | 137 |
| H (79A) | 3472  | 1145 | 5979  | 135 |
| H (79B) | 3358  | 832  | 5133  | 135 |
| H (80A) | 2985  | 2135 | 5519  | 116 |
| H (80B) | 3472  | 1969 | 4836  | 116 |
| H (77C) | 1990  | 1058 | 4584  | 113 |
| H (77D) | 1899  | 1536 | 5288  | 113 |
| H (78C) | 2906  | 619  | 5201  | 137 |
| H (78D) | 2424  | 690  | 5919  | 137 |
| H (79C) | 2783  | 1812 | 6065  | 135 |
| H (79D) | 3393  | 1378 | 6159  | 135 |
| H (80C) | 3481  | 2002 | 4889  | 116 |
| H (80D) | 3444  | 1277 | 4696  | 116 |

---

Table 6. Torsion angles [deg] for joe094a.

---

|                          |             |
|--------------------------|-------------|
| O(13)-Rh(1)-Rh(2)-O(10)  | -89.63(9)   |
| O(1)-Rh(1)-Rh(2)-O(10)   | -178.85(10) |
| O(5)-Rh(1)-Rh(2)-O(10)   | 90.04(9)    |
| O(9)-Rh(1)-Rh(2)-O(10)   | -0.32(9)    |
| O(17)-Rh(1)-Rh(2)-O(10)  | 148.8(11)   |
| O(13)-Rh(1)-Rh(2)-O(2)   | 90.28(10)   |
| O(1)-Rh(1)-Rh(2)-O(2)    | 1.06(9)     |
| O(5)-Rh(1)-Rh(2)-O(2)    | -90.05(10)  |
| O(9)-Rh(1)-Rh(2)-O(2)    | 179.59(10)  |
| O(17)-Rh(1)-Rh(2)-O(2)   | -31.3(11)   |
| O(13)-Rh(1)-Rh(2)-O(14)  | 0.28(9)     |
| O(1)-Rh(1)-Rh(2)-O(14)   | -88.94(10)  |
| O(5)-Rh(1)-Rh(2)-O(14)   | 179.95(10)  |
| O(9)-Rh(1)-Rh(2)-O(14)   | 89.59(10)   |
| O(17)-Rh(1)-Rh(2)-O(14)  | -121.3(11)  |
| O(13)-Rh(1)-Rh(2)-O(6)   | -179.02(9)  |
| O(1)-Rh(1)-Rh(2)-O(6)    | 91.76(9)    |
| O(5)-Rh(1)-Rh(2)-O(6)    | 0.65(9)     |
| O(9)-Rh(1)-Rh(2)-O(6)    | -89.71(9)   |
| O(17)-Rh(1)-Rh(2)-O(6)   | 59.4(11)    |
| O(13)-Rh(1)-Rh(2)-O(19') | -98(29)     |
| O(1)-Rh(1)-Rh(2)-O(19')  | 172(29)     |
| O(5)-Rh(1)-Rh(2)-O(19')  | 81(29)      |
| O(9)-Rh(1)-Rh(2)-O(19')  | -9(29)      |
| O(17)-Rh(1)-Rh(2)-O(19') | 140(29)     |
| O(13)-Rh(1)-Rh(2)-O(19)  | 142(85)     |
| O(1)-Rh(1)-Rh(2)-O(19)   | 53(84)      |
| O(5)-Rh(1)-Rh(2)-O(19)   | -38(84)     |
| O(9)-Rh(1)-Rh(2)-O(19)   | -129(84)    |
| O(17)-Rh(1)-Rh(2)-O(19)  | 21(84)      |
| O(2)-C(1)-C(2)-N(1)      | -132.9(3)   |
| O(1)-C(1)-C(2)-N(1)      | 49.6(4)     |
| O(2)-C(1)-C(2)-C(3)      | -0.4(5)     |
| O(1)-C(1)-C(2)-C(3)      | -178.0(3)   |
| N(1)-C(2)-C(3)-C(4)      | 67.5(4)     |
| C(1)-C(2)-C(3)-C(4)      | -62.8(5)    |
| N(1)-C(2)-C(3)-C(6)      | -168.9(3)   |
| C(1)-C(2)-C(3)-C(6)      | 60.8(5)     |
| N(1)-C(2)-C(3)-C(5)      | -53.0(5)    |
| C(1)-C(2)-C(3)-C(5)      | 176.7(4)    |
| O(3)-C(7)-C(8)-C(13)     | 172.6(4)    |
| N(1)-C(7)-C(8)-C(13)     | -10.0(5)    |
| O(3)-C(7)-C(8)-C(9)      | -9.9(5)     |
| N(1)-C(7)-C(8)-C(9)      | 167.5(3)    |
| C(13)-C(8)-C(9)-C(10)    | 2.2(6)      |
| C(7)-C(8)-C(9)-C(10)     | -175.2(3)   |
| C(8)-C(9)-C(10)-C(11)    | -4.8(6)     |
| C(9)-C(10)-C(11)-C(12)   | 1.5(7)      |
| C(10)-C(11)-C(12)-C(17)  | -179.2(4)   |
| C(10)-C(11)-C(12)-C(13)  | 4.0(6)      |
| C(9)-C(8)-C(13)-C(14)    | -176.4(3)   |
| C(7)-C(8)-C(13)-C(14)    | 1.0(6)      |
| C(9)-C(8)-C(13)-C(12)    | 3.3(6)      |
| C(7)-C(8)-C(13)-C(12)    | -179.2(3)   |
| C(17)-C(12)-C(13)-C(8)   | 176.7(4)    |
| C(11)-C(12)-C(13)-C(8)   | -6.3(5)     |
| C(17)-C(12)-C(13)-C(14)  | -3.6(5)     |

|                               |            |
|-------------------------------|------------|
| C(11) - C(12) - C(13) - C(14) | 173.4 (3)  |
| C(8) - C(13) - C(14) - C(15)  | -178.1 (4) |
| C(12) - C(13) - C(14) - C(15) | 2.2 (6)    |
| C(8) - C(13) - C(14) - C(18)  | 5.2 (6)    |
| C(12) - C(13) - C(14) - C(18) | -174.5 (3) |
| C(13) - C(14) - C(15) - C(16) | 0.4 (6)    |
| C(18) - C(14) - C(15) - C(16) | 177.1 (4)  |
| C(14) - C(15) - C(16) - C(17) | -1.6 (7)   |
| C(15) - C(16) - C(17) - C(12) | 0.0 (7)    |
| C(11) - C(12) - C(17) - C(16) | -174.2 (4) |
| C(13) - C(12) - C(17) - C(16) | 2.5 (6)    |
| C(15) - C(14) - C(18) - O(4)  | 0.7 (6)    |
| C(13) - C(14) - C(18) - O(4)  | 177.4 (3)  |
| C(15) - C(14) - C(18) - N(1)  | -179.1 (4) |
| C(13) - C(14) - C(18) - N(1)  | -2.4 (5)   |
| O(6) - C(19) - C(20) - N(2)   | -137.7 (3) |
| O(5) - C(19) - C(20) - N(2)   | 46.4 (4)   |
| O(6) - C(19) - C(20) - C(21)  | -6.1 (4)   |
| O(5) - C(19) - C(20) - C(21)  | 178.1 (3)  |
| N(2) - C(20) - C(21) - C(22)  | 71.0 (4)   |
| C(19) - C(20) - C(21) - C(22) | -58.2 (4)  |
| N(2) - C(20) - C(21) - C(24)  | -166.8 (3) |
| C(19) - C(20) - C(21) - C(24) | 64.1 (4)   |
| N(2) - C(20) - C(21) - C(23)  | -49.8 (4)  |
| C(19) - C(20) - C(21) - C(23) | -178.9 (3) |
| O(7) - C(25) - C(26) - C(27)  | -2.5 (5)   |
| N(2) - C(25) - C(26) - C(27)  | 178.6 (3)  |
| O(7) - C(25) - C(26) - C(31)  | 172.5 (4)  |
| N(2) - C(25) - C(26) - C(31)  | -6.3 (5)   |
| C(31) - C(26) - C(27) - C(28) | -1.0 (5)   |
| C(25) - C(26) - C(27) - C(28) | 174.0 (3)  |
| C(26) - C(27) - C(28) - C(29) | 0.1 (6)    |
| C(27) - C(28) - C(29) - C(30) | 0.7 (6)    |
| C(28) - C(29) - C(30) - C(35) | -178.8 (4) |
| C(28) - C(29) - C(30) - C(31) | -0.5 (6)   |
| C(27) - C(26) - C(31) - C(32) | 178.9 (3)  |
| C(25) - C(26) - C(31) - C(32) | 4.0 (5)    |
| C(27) - C(26) - C(31) - C(30) | 1.2 (5)    |
| C(25) - C(26) - C(31) - C(30) | -173.8 (3) |
| C(35) - C(30) - C(31) - C(26) | 178.0 (4)  |
| C(29) - C(30) - C(31) - C(26) | -0.4 (5)   |
| C(35) - C(30) - C(31) - C(32) | 0.1 (5)    |
| C(29) - C(30) - C(31) - C(32) | -178.2 (4) |
| C(26) - C(31) - C(32) - C(33) | -177.5 (4) |
| C(30) - C(31) - C(32) - C(33) | 0.3 (6)    |
| C(26) - C(31) - C(32) - C(36) | 2.6 (5)    |
| C(30) - C(31) - C(32) - C(36) | -179.6 (3) |
| C(31) - C(32) - C(33) - C(34) | -0.1 (6)   |
| C(36) - C(32) - C(33) - C(34) | 179.8 (4)  |
| C(32) - C(33) - C(34) - C(35) | -0.6 (8)   |
| C(33) - C(34) - C(35) - C(30) | 1.1 (8)    |
| C(31) - C(30) - C(35) - C(34) | -0.9 (7)   |
| C(29) - C(30) - C(35) - C(34) | 177.4 (5)  |
| C(33) - C(32) - C(36) - O(8)  | -4.9 (6)   |
| C(31) - C(32) - C(36) - O(8)  | 175.0 (3)  |
| C(33) - C(32) - C(36) - N(2)  | 173.4 (3)  |
| C(31) - C(32) - C(36) - N(2)  | -6.7 (5)   |
| O(10) - C(37) - C(38) - N(3)  | -134.0 (3) |
| O(9) - C(37) - C(38) - N(3)   | 50.0 (4)   |
| O(10) - C(37) - C(38) - C(39) | -3.5 (4)   |
| O(9) - C(37) - C(38) - C(39)  | -179.5 (3) |

|                               |           |
|-------------------------------|-----------|
| N(3) - C(38) - C(39) - C(42)  | 69.4(4)   |
| C(37) - C(38) - C(39) - C(42) | -59.8(4)  |
| N(3) - C(38) - C(39) - C(40)  | -166.9(3) |
| C(37) - C(38) - C(39) - C(40) | 63.9(4)   |
| N(3) - C(38) - C(39) - C(41)  | -51.6(4)  |
| C(37) - C(38) - C(39) - C(41) | 179.2(3)  |
| O(11) - C(43) - C(44) - C(45) | -0.2(5)   |
| N(3) - C(43) - C(44) - C(45)  | -179.7(3) |
| O(11) - C(43) - C(44) - C(49) | 179.5(3)  |
| N(3) - C(43) - C(44) - C(49)  | -0.1(5)   |
| C(49) - C(44) - C(45) - C(46) | -2.4(6)   |
| C(43) - C(44) - C(45) - C(46) | 177.2(4)  |
| C(44) - C(45) - C(46) - C(47) | 0.1(7)    |
| C(45) - C(46) - C(47) - C(48) | 1.8(8)    |
| C(46) - C(47) - C(48) - C(53) | 178.0(4)  |
| C(46) - C(47) - C(48) - C(49) | -1.3(7)   |
| C(45) - C(44) - C(49) - C(50) | -176.0(4) |
| C(43) - C(44) - C(49) - C(50) | 4.4(5)    |
| C(45) - C(44) - C(49) - C(48) | 2.8(5)    |
| C(43) - C(44) - C(49) - C(48) | -176.8(3) |
| C(47) - C(48) - C(49) - C(50) | 177.8(4)  |
| C(53) - C(48) - C(49) - C(50) | -1.5(5)   |
| C(47) - C(48) - C(49) - C(44) | -1.0(5)   |
| C(53) - C(48) - C(49) - C(44) | 179.6(3)  |
| C(44) - C(49) - C(50) - C(51) | 179.5(3)  |
| C(48) - C(49) - C(50) - C(51) | 0.7(6)    |
| C(44) - C(49) - C(50) - C(54) | -1.0(5)   |
| C(48) - C(49) - C(50) - C(54) | -179.8(3) |
| C(49) - C(50) - C(51) - C(52) | 1.1(6)    |
| C(54) - C(50) - C(51) - C(52) | -178.4(4) |
| C(50) - C(51) - C(52) - C(53) | -2.0(7)   |
| C(51) - C(52) - C(53) - C(48) | 1.1(8)    |
| C(47) - C(48) - C(53) - C(52) | -178.7(5) |
| C(49) - C(48) - C(53) - C(52) | 0.6(6)    |
| C(51) - C(50) - C(54) - O(12) | -6.1(6)   |
| C(49) - C(50) - C(54) - O(12) | 174.4(4)  |
| C(51) - C(50) - C(54) - N(3)  | 172.9(3)  |
| C(49) - C(50) - C(54) - N(3)  | -6.6(5)   |
| O(14) - C(55) - C(56) - N(4)  | -137.9(3) |
| O(13) - C(55) - C(56) - N(4)  | 47.6(4)   |
| O(14) - C(55) - C(56) - C(57) | -5.4(5)   |
| O(13) - C(55) - C(56) - C(57) | -179.8(3) |
| N(4) - C(56) - C(57) - C(59)  | 70.9(5)   |
| C(55) - C(56) - C(57) - C(59) | -59.5(5)  |
| N(4) - C(56) - C(57) - C(58)  | -165.8(4) |
| C(55) - C(56) - C(57) - C(58) | 63.8(5)   |
| N(4) - C(56) - C(57) - C(60)  | -50.2(5)  |
| C(55) - C(56) - C(57) - C(60) | 179.5(4)  |
| O(15) - C(61) - C(62) - C(63) | 6.4(6)    |
| N(4) - C(61) - C(62) - C(63)  | -173.7(3) |
| O(15) - C(61) - C(62) - C(67) | -171.5(4) |
| N(4) - C(61) - C(62) - C(67)  | 8.3(5)    |
| C(67) - C(62) - C(63) - C(64) | 0.7(6)    |
| C(61) - C(62) - C(63) - C(64) | -177.2(4) |
| C(62) - C(63) - C(64) - C(65) | 1.1(7)    |
| C(63) - C(64) - C(65) - C(66) | -0.9(7)   |
| C(64) - C(65) - C(66) - C(67) | -1.1(6)   |
| C(64) - C(65) - C(66) - C(71) | 177.2(4)  |
| C(63) - C(62) - C(67) - C(68) | -178.9(4) |
| C(61) - C(62) - C(67) - C(68) | -1.0(5)   |
| C(63) - C(62) - C(67) - C(66) | -2.6(5)   |

|                         |           |
|-------------------------|-----------|
| C(61)-C(62)-C(67)-C(66) | 175.3(3)  |
| C(65)-C(66)-C(67)-C(68) | 179.1(3)  |
| C(71)-C(66)-C(67)-C(68) | 0.8(5)    |
| C(65)-C(66)-C(67)-C(62) | 2.8(5)    |
| C(71)-C(66)-C(67)-C(62) | -175.6(3) |
| C(62)-C(67)-C(68)-C(69) | 176.3(3)  |
| C(66)-C(67)-C(68)-C(69) | 0.0(5)    |
| C(62)-C(67)-C(68)-C(72) | -2.8(5)   |
| C(66)-C(67)-C(68)-C(72) | -179.1(3) |
| C(67)-C(68)-C(69)-C(70) | -0.3(5)   |
| C(72)-C(68)-C(69)-C(70) | 178.8(3)  |
| C(68)-C(69)-C(70)-C(71) | -0.3(6)   |
| C(69)-C(70)-C(71)-C(66) | 1.1(6)    |
| C(65)-C(66)-C(71)-C(70) | -179.6(4) |
| C(67)-C(66)-C(71)-C(70) | -1.3(6)   |
| C(69)-C(68)-C(72)-O(16) | 1.3(5)    |
| C(67)-C(68)-C(72)-O(16) | -179.6(3) |
| C(69)-C(68)-C(72)-N(4)  | -179.9(3) |
| C(67)-C(68)-C(72)-N(4)  | -0.8(5)   |
| O(4)-C(18)-N(1)-C(7)    | 173.0(3)  |
| C(14)-C(18)-N(1)-C(7)   | -7.2(5)   |
| O(4)-C(18)-N(1)-C(2)    | -2.2(5)   |
| C(14)-C(18)-N(1)-C(2)   | 177.5(3)  |
| O(3)-C(7)-N(1)-C(18)    | -169.4(3) |
| C(8)-C(7)-N(1)-C(18)    | 13.1(5)   |
| O(3)-C(7)-N(1)-C(2)     | 6.0(5)    |
| C(8)-C(7)-N(1)-C(2)     | -171.5(3) |
| C(1)-C(2)-N(1)-C(18)    | 45.7(4)   |
| C(3)-C(2)-N(1)-C(18)    | -88.3(4)  |
| C(1)-C(2)-N(1)-C(7)     | -129.9(3) |
| C(3)-C(2)-N(1)-C(7)     | 96.1(4)   |
| O(7)-C(25)-N(2)-C(36)   | -176.8(3) |
| C(26)-C(25)-N(2)-C(36)  | 2.0(5)    |
| O(7)-C(25)-N(2)-C(20)   | -1.7(5)   |
| C(26)-C(25)-N(2)-C(20)  | 177.2(3)  |
| O(8)-C(36)-N(2)-C(25)   | -177.4(3) |
| C(32)-C(36)-N(2)-C(25)  | 4.3(5)    |
| O(8)-C(36)-N(2)-C(20)   | 7.5(5)    |
| C(32)-C(36)-N(2)-C(20)  | -170.8(3) |
| C(19)-C(20)-N(2)-C(25)  | -133.4(3) |
| C(21)-C(20)-N(2)-C(25)  | 93.6(4)   |
| C(19)-C(20)-N(2)-C(36)  | 42.1(4)   |
| C(21)-C(20)-N(2)-C(36)  | -90.9(4)  |
| O(12)-C(54)-N(3)-C(43)  | -169.6(3) |
| C(50)-C(54)-N(3)-C(43)  | 11.4(5)   |
| O(12)-C(54)-N(3)-C(38)  | 6.4(5)    |
| C(50)-C(54)-N(3)-C(38)  | -172.7(3) |
| O(11)-C(43)-N(3)-C(54)  | 172.3(3)  |
| C(44)-C(43)-N(3)-C(54)  | -8.1(5)   |
| O(11)-C(43)-N(3)-C(38)  | -3.6(5)   |
| C(44)-C(43)-N(3)-C(38)  | 176.0(3)  |
| C(37)-C(38)-N(3)-C(54)  | -130.3(3) |
| C(39)-C(38)-N(3)-C(54)  | 97.2(4)   |
| C(37)-C(38)-N(3)-C(43)  | 45.9(4)   |
| C(39)-C(38)-N(3)-C(43)  | -86.6(4)  |
| O(15)-C(61)-N(4)-C(72)  | 167.2(3)  |
| C(62)-C(61)-N(4)-C(72)  | -12.6(5)  |
| O(15)-C(61)-N(4)-C(56)  | -4.7(5)   |
| C(62)-C(61)-N(4)-C(56)  | 175.5(3)  |
| O(16)-C(72)-N(4)-C(61)  | -172.2(3) |
| C(68)-C(72)-N(4)-C(61)  | 8.9(5)    |

|                                 |            |
|---------------------------------|------------|
| O (16) -C (72) -N (4) -C (56)   | -0.3 (5)   |
| C (68) -C (72) -N (4) -C (56)   | -179.2 (3) |
| C (55) -C (56) -N (4) -C (61)   | 51.1 (4)   |
| C (57) -C (56) -N (4) -C (61)   | -83.9 (4)  |
| C (55) -C (56) -N (4) -C (72)   | -121.3 (3) |
| C (57) -C (56) -N (4) -C (72)   | 103.7 (4)  |
| O (2) -C (1) -O (1) -Rh (1)     | 2.8 (5)    |
| C (2) -C (1) -O (1) -Rh (1)     | -179.9 (2) |
| O (13) -Rh (1) -O (1) -C (1)    | -90.3 (2)  |
| O (5) -Rh (1) -O (1) -C (1)     | 86.1 (2)   |
| O (9) -Rh (1) -O (1) -C (1)     | -17.7 (11) |
| Rh (2) -Rh (1) -O (1) -C (1)    | -2.2 (2)   |
| O (17) -Rh (1) -O (1) -C (1)    | 176.3 (2)  |
| O (1) -C (1) -O (2) -Rh (2)     | -1.5 (5)   |
| C (2) -C (1) -O (2) -Rh (2)     | -178.8 (2) |
| O (10) -Rh (2) -O (2) -C (1)    | 3 (3)      |
| O (14) -Rh (2) -O (2) -C (1)    | 88.1 (3)   |
| O (6) -Rh (2) -O (2) -C (1)     | -88.2 (3)  |
| O (19') -Rh (2) -O (2) -C (1)   | -180.0 (9) |
| O (19) -Rh (2) -O (2) -C (1)    | -180.0 (9) |
| Rh (1) -Rh (2) -O (2) -C (1)    | -0.3 (2)   |
| O (6) -C (19) -O (5) -Rh (1)    | 6.5 (4)    |
| C (20) -C (19) -O (5) -Rh (1)   | -178.1 (2) |
| O (13) -Rh (1) -O (5) -C (19)   | 1.7 (15)   |
| O (1) -Rh (1) -O (5) -C (19)    | -90.8 (2)  |
| O (9) -Rh (1) -O (5) -C (19)    | 83.9 (2)   |
| Rh (2) -Rh (1) -O (5) -C (19)   | -3.5 (2)   |
| O (17) -Rh (1) -O (5) -C (19)   | 178.9 (2)  |
| O (5) -C (19) -O (6) -Rh (2)    | -5.8 (4)   |
| C (20) -C (19) -O (6) -Rh (2)   | 178.9 (2)  |
| O (10) -Rh (2) -O (6) -C (19)   | -87.0 (2)  |
| O (2) -Rh (2) -O (6) -C (19)    | 91.1 (2)   |
| O (14) -Rh (2) -O (6) -C (19)   | -8.9 (16)  |
| O (19') -Rh (2) -O (6) -C (19)  | -176.0 (7) |
| O (19) -Rh (2) -O (6) -C (19)   | -178.2 (7) |
| Rh (1) -Rh (2) -O (6) -C (19)   | 2.1 (2)    |
| O (10) -C (37) -O (9) -Rh (1)   | 3.8 (4)    |
| C (38) -C (37) -O (9) -Rh (1)   | 179.4 (2)  |
| O (13) -Rh (1) -O (9) -C (37)   | 86.7 (2)   |
| O (1) -Rh (1) -O (9) -C (37)    | 14.1 (11)  |
| O (5) -Rh (1) -O (9) -C (37)    | -89.8 (2)  |
| Rh (2) -Rh (1) -O (9) -C (37)   | -1.4 (2)   |
| O (17) -Rh (1) -O (9) -C (37)   | -180.0 (2) |
| O (9) -C (37) -O (10) -Rh (2)   | -4.2 (4)   |
| C (38) -C (37) -O (10) -Rh (2)  | -179.7 (2) |
| O (2) -Rh (2) -O (10) -C (37)   | -1 (3)     |
| O (14) -Rh (2) -O (10) -C (37)  | -86.2 (2)  |
| O (6) -Rh (2) -O (10) -C (37)   | 90.2 (2)   |
| O (19') -Rh (2) -O (10) -C (37) | -178.1 (9) |
| O (19) -Rh (2) -O (10) -C (37)  | -178.1 (8) |
| Rh (1) -Rh (2) -O (10) -C (37)  | 2.2 (2)    |
| O (14) -C (55) -O (13) -Rh (1)  | 1.8 (5)    |
| C (56) -C (55) -O (13) -Rh (1)  | 175.8 (2)  |
| O (1) -Rh (1) -O (13) -C (55)   | 86.2 (2)   |
| O (5) -Rh (1) -O (13) -C (55)   | -6.3 (16)  |
| O (9) -Rh (1) -O (13) -C (55)   | -88.5 (2)  |
| Rh (2) -Rh (1) -O (13) -C (55)  | -1.1 (2)   |
| O (17) -Rh (1) -O (13) -C (55)  | 176.6 (2)  |
| O (13) -C (55) -O (14) -Rh (2)  | -1.5 (5)   |
| C (56) -C (55) -O (14) -Rh (2)  | -175.2 (2) |
| O (10) -Rh (2) -O (14) -C (55)  | 89.5 (2)   |

|                             |            |
|-----------------------------|------------|
| O(2)-Rh(2)-O(14)-C(55)      | -88.6(3)   |
| O(6)-Rh(2)-O(14)-C(55)      | 11.4(16)   |
| O(19')-Rh(2)-O(14)-C(55)    | 178.5(7)   |
| O(19)-Rh(2)-O(14)-C(55)     | -179.4(7)  |
| Rh(1)-Rh(2)-O(14)-C(55)     | 0.4(2)     |
| O(18)-C(73)-O(17)-Rh(1)     | 173.3(2)   |
| C(74)-C(73)-O(17)-Rh(1)     | -5.7(5)    |
| O(13)-Rh(1)-O(17)-C(73)     | -113.5(3)  |
| O(1)-Rh(1)-O(17)-C(73)      | -24.3(3)   |
| O(5)-Rh(1)-O(17)-C(73)      | 66.7(3)    |
| O(9)-Rh(1)-O(17)-C(73)      | 157.0(3)   |
| Rh(2)-Rh(1)-O(17)-C(73)     | 8.0(13)    |
| O(17)-C(73)-O(18)-C(75)     | -2.2(5)    |
| C(74)-C(73)-O(18)-C(75)     | 177.0(3)   |
| C(76)-C(75)-O(18)-C(73)     | -171.3(4)  |
| O(20)-C(81)-O(21)-C(83)     | 3.7(10)    |
| C(82)-C(81)-O(21)-C(83)     | -178.0(7)  |
| C(84)-C(83)-O(21)-C(81)     | -165.5(7)  |
| O(10)-Rh(2)-O(19)-C(77)     | 180(2)     |
| O(2)-Rh(2)-O(19)-C(77)      | 0(2)       |
| O(14)-Rh(2)-O(19)-C(77)     | 90(2)      |
| O(6)-Rh(2)-O(19)-C(77)      | -91(2)     |
| O(19')-Rh(2)-O(19)-C(77)    | -180(100)  |
| Rh(1)-Rh(2)-O(19)-C(77)     | -52(84)    |
| O(10)-Rh(2)-O(19)-C(80)     | -38(2)     |
| O(2)-Rh(2)-O(19)-C(80)      | 142(2)     |
| O(14)-Rh(2)-O(19)-C(80)     | -128(2)    |
| O(6)-Rh(2)-O(19)-C(80)      | 52(2)      |
| O(19')-Rh(2)-O(19)-C(80)    | -37(45)    |
| Rh(1)-Rh(2)-O(19)-C(80)     | 90(84)     |
| C(80)-O(19)-C(77)-C(78)     | 33(3)      |
| Rh(2)-O(19)-C(77)-C(78)     | 179.6(17)  |
| O(19)-C(77)-C(78)-C(79)     | -63(2)     |
| C(77)-C(78)-C(79)-C(80)     | 64.0(14)   |
| C(77)-O(19)-C(80)-C(79)     | 11(3)      |
| Rh(2)-O(19)-C(80)-C(79)     | -134.5(19) |
| C(78)-C(79)-C(80)-O(19)     | -49.8(19)  |
| O(10)-Rh(2)-O(19')-C(77')   | 150(3)     |
| O(2)-Rh(2)-O(19')-C(77')    | -30(3)     |
| O(14)-Rh(2)-O(19')-C(77')   | 60(3)      |
| O(6)-Rh(2)-O(19')-C(77')    | -120(3)    |
| O(19)-Rh(2)-O(19')-C(77')   | -29(45)    |
| Rh(1)-Rh(2)-O(19')-C(77')   | 159(26)    |
| O(10)-Rh(2)-O(19')-C(80')   | -67(2)     |
| O(2)-Rh(2)-O(19')-C(80')    | 113(2)     |
| O(14)-Rh(2)-O(19')-C(80')   | -157(2)    |
| O(6)-Rh(2)-O(19')-C(80')    | 22(2)      |
| O(19)-Rh(2)-O(19')-C(80')   | 113(49)    |
| Rh(1)-Rh(2)-O(19')-C(80')   | -58(31)    |
| C(80')-O(19')-C(77')-C(78') | -5(3)      |
| Rh(2)-O(19')-C(77')-C(78')  | 139(2)     |
| O(19')-C(77')-C(78')-C(79') | 45(2)      |
| C(77')-C(78')-C(79')-C(80') | -60.1(17)  |
| C(77')-O(19')-C(80')-C(79') | -36(3)     |
| Rh(2)-O(19')-C(80')-C(79')  | 175.2(18)  |
| C(78')-C(79')-C(80')-O(19') | 60(2)      |

---

Symmetry transformations used to generate equivalent atoms:



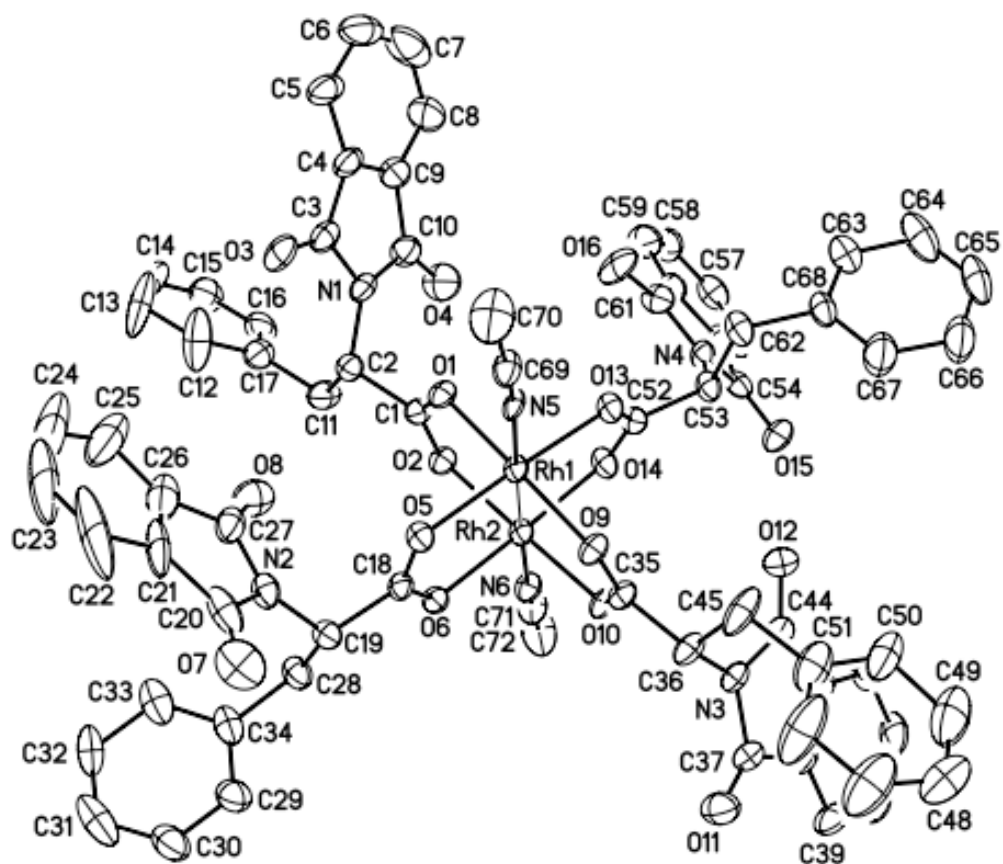

Figure 3. Molecular diagram of 4 compound with ellipsoids at 30% probability. Three cocrystallized acetonitrile solvent molecules and H-atoms deleted for clarity.

Table 1. Crystal data and structure refinement for joef099a.

|                                   |                                                                                                                       |
|-----------------------------------|-----------------------------------------------------------------------------------------------------------------------|
| Identification code               | joef099a                                                                                                              |
| Empirical formula                 | C78 H63 N9 O16 Rh2                                                                                                    |
| Formula weight                    | 1588.19                                                                                                               |
| Temperature                       | 200(2) K                                                                                                              |
| Wavelength                        | 0.71073 Å                                                                                                             |
| Crystal system, space group       | Monoclinic, P2(1)                                                                                                     |
| Unit cell dimensions              | a = 12.649(4) Å    alpha = 90 deg.<br>b = 24.398(7) Å    beta = 107.947(4) deg.<br>c = 12.670(4) Å    gamma = 90 deg. |
| Volume                            | 3719.9(18) Å <sup>3</sup>                                                                                             |
| Z, Calculated density             | 2, 1.418 Mg/m <sup>3</sup>                                                                                            |
| Absorption coefficient            | 0.517 mm <sup>-1</sup>                                                                                                |
| F(000)                            | 1624                                                                                                                  |
| Crystal size                      | 0.25 x 0.22 x 0.17 mm                                                                                                 |
| Theta range for data collection   | 1.67 to 28.34 deg.                                                                                                    |
| Limiting indices                  | -16<=h<=16, -32<=k<=32, -16<=l<=16                                                                                    |
| Reflections collected / unique    | 51127 / 18446 [R(int) = 0.0403]                                                                                       |
| Completeness to theta = 25.00     | 99.9 %                                                                                                                |
| Absorption correction             | Semi-empirical from equivalents                                                                                       |
| Max. and min. transmission        | 0.9159 and 0.8812                                                                                                     |
| Refinement method                 | Full-matrix least-squares on F <sup>2</sup>                                                                           |
| Data / restraints / parameters    | 18446 / 16 / 903                                                                                                      |
| Goodness-of-fit on F <sup>2</sup> | 1.023                                                                                                                 |
| Final R indices [I>2sigma(I)]     | R1 = 0.0525, wR2 = 0.1383                                                                                             |
| R indices (all data)              | R1 = 0.0597, wR2 = 0.1444                                                                                             |
| Absolute structure parameter      | 0.03(2)                                                                                                               |
| Largest diff. peak and hole       | 1.198 and -0.557 e.Å <sup>-3</sup>                                                                                    |

Table 2. Atomic coordinates ( $\times 10^4$ ) and equivalent isotropic displacement parameters ( $\text{\AA}^2 \times 10^3$ ) for joef099a. U(eq) is defined as one third of the trace of the orthogonalized Uij tensor.

|       | x         | y         | z          | U(eq)    |
|-------|-----------|-----------|------------|----------|
| Rh(1) | 4635 (1)  | 320 (1)   | 3032 (1)   | 32 (1)   |
| Rh(2) | 5505 (1)  | -312 (1)  | 2110 (1)   | 33 (1)   |
| N(1)  | 1252 (3)  | -718 (2)  | 1272 (4)   | 44 (1)   |
| N(2)  | 5036 (4)  | -1053 (2) | 5807 (4)   | 47 (1)   |
| N(3)  | 8531 (3)  | 924 (2)   | 2750 (4)   | 43 (1)   |
| N(4)  | 3931 (3)  | 760 (2)   | -1198 (3)  | 42 (1)   |
| N(5)  | 3844 (3)  | 927 (2)   | 3883 (3)   | 34 (1)   |
| N(6)  | 6333 (4)  | -889 (2)  | 1231 (4)   | 43 (1)   |
| O(1)  | 3231 (3)  | -127 (2)  | 2461 (3)   | 39 (1)   |
| O(2)  | 4085 (3)  | -760 (2)  | 1707 (3)   | 40 (1)   |
| O(3)  | 514 (4)   | -621 (2)  | 2710 (4)   | 65 (1)   |
| O(4)  | 1436 (4)  | -745 (3)  | -499 (4)   | 80 (1)   |
| O(5)  | 5084 (3)  | -196 (2)  | 4376 (3)   | 39 (1)   |
| O(6)  | 6005 (3)  | -750 (2)  | 3546 (3)   | 37 (1)   |
| O(7)  | 5883 (6)  | -775 (3)  | 7555 (4)   | 98 (2)   |
| O(8)  | 3683 (4)  | -1409 (2) | 4242 (5)   | 79 (1)   |
| O(9)  | 6087 (3)  | 738 (2)   | 3541 (3)   | 40 (1)   |
| O(10) | 6895 (3)  | 185 (2)   | 2590 (3)   | 39 (1)   |
| O(11) | 10179 (4) | 713 (2)   | 4069 (4)   | 70 (1)   |
| O(12) | 7237 (3)  | 1209 (2)  | 1114 (4)   | 63 (1)   |
| O(13) | 4271 (3)  | 795 (1)   | 1647 (3)   | 38 (1)   |
| O(14) | 4963 (3)  | 159 (2)   | 725 (3)    | 42 (1)   |
| O(15) | 5475 (3)  | 777 (2)   | -1805 (3)  | 57 (1)   |
| O(16) | 2224 (4)  | 569 (2)   | -1010 (4)  | 75 (1)   |
| C(1)  | 3288 (4)  | -586 (2)  | 2025 (4)   | 38 (1)   |
| C(2)  | 2304 (4)  | -971 (2)  | 1899 (4)   | 42 (1)   |
| C(3)  | 428 (4)   | -589 (2)  | 1743 (5)   | 50 (1)   |
| C(4)  | -535 (5)  | -406 (2)  | 815 (6)    | 59 (2)   |
| C(5)  | -1570 (5) | -231 (3)  | 828 (8)    | 82 (2)   |
| C(6)  | -2309 (7) | -74 (4)   | -230 (12)  | 107 (4)  |
| C(7)  | -2022 (9) | -139 (5)  | -1211 (11) | 122 (5)  |
| C(8)  | -1036 (7) | -305 (4)  | -1200 (8)  | 98 (3)   |
| C(9)  | -272 (5)  | -453 (3)  | -152 (6)   | 64 (2)   |
| C(10) | 875 (5)   | -644 (3)  | 124 (5)    | 55 (1)   |
| C(11) | 2471 (5)  | -1538 (3) | 1434 (6)   | 56 (2)   |
| C(12) | 1039 (11) | -2010 (4) | 2125 (9)   | 120 (4)  |
| C(13) | 158 (13)  | -2392 (6) | 1947 (11)  | 145 (6)  |
| C(14) | -248 (8)  | -2641 (4) | 963 (10)   | 96 (3)   |
| C(15) | 192 (7)   | -2576 (3) | 154 (7)    | 78 (2)   |
| C(16) | 1043 (6)  | -2205 (3) | 313 (7)    | 74 (2)   |
| C(17) | 1510 (5)  | -1922 (3) | 1303 (6)   | 54 (1)   |
| C(18) | 5643 (4)  | -623 (2)  | 4319 (4)   | 36 (1)   |
| C(19) | 5932 (4)  | -1004 (2) | 5328 (4)   | 41 (1)   |
| C(20) | 5103 (8)  | -948 (3)  | 6902 (5)   | 72 (2)   |
| C(21) | 4009 (10) | -1125 (3) | 6983 (9)   | 99 (4)   |
| C(22) | 3615 (18) | -1069 (5) | 7941 (12)  | 210 (10) |
| C(23) | 2630 (20) | -1230 (7) | 7852 (19)  | 232 (16) |
| C(24) | 1980 (20) | -1417 (8) | 6900 (30)  | 266 (19) |
| C(25) | 2277 (10) | -1485 (5) | 5951 (15)  | 146 (6)  |
| C(26) | 3344 (8)  | -1326 (3) | 5987 (10)  | 88 (3)   |

|        |            |           |            |          |
|--------|------------|-----------|------------|----------|
| C (27) | 3975 (6)   | -1282 (2) | 5214 (7)   | 63 (2)   |
| C (28) | 6315 (5)   | -1575 (3) | 5079 (5)   | 51 (1)   |
| C (29) | 7604 (6)   | -1808 (3) | 7003 (6)   | 66 (2)   |
| C (30) | 7895 (7)   | -2114 (3) | 7936 (6)   | 78 (2)   |
| C (31) | 7294 (10)  | -2549 (4) | 8047 (7)   | 96 (3)   |
| C (32) | 6329 (8)   | -2678 (3) | 7229 (7)   | 80 (2)   |
| C (33) | 6010 (8)   | -2358 (3) | 6241 (6)   | 77 (2)   |
| C (34) | 6668 (6)   | -1926 (2) | 6127 (5)   | 56 (2)   |
| C (35) | 6853 (4)   | 600 (2)   | 3171 (4)   | 38 (1)   |
| C (36) | 7877 (4)   | 982 (3)   | 3485 (5)   | 49 (1)   |
| C (37) | 9679 (4)   | 811 (3)   | 3133 (5)   | 48 (1)   |
| C (38) | 10057 (4)  | 860 (2)   | 2151 (5)   | 47 (1)   |
| C (39) | 11104 (5)  | 747 (3)   | 2047 (6)   | 64 (2)   |
| C (40) | 11237 (6)  | 798 (3)   | 1023 (7)   | 69 (2)   |
| C (41) | 10365 (7)  | 968 (3)   | 136 (7)    | 78 (2)   |
| C (42) | 9287 (6)   | 1063 (3)  | 206 (6)    | 67 (2)   |
| C (43) | 9182 (5)   | 1013 (2)  | 1258 (5)   | 51 (1)   |
| C (44) | 8191 (4)   | 1073 (2)  | 1640 (5)   | 50 (1)   |
| C (45) | 7589 (6)   | 1578 (3)  | 3617 (8)   | 76 (2)   |
| C (46) | 9309 (10)  | 1986 (5)  | 4917 (10)  | 128 (5)  |
| C (47) | 10265 (10) | 2294 (5)  | 5123 (12)  | 132 (5)  |
| C (48) | 10584 (8)  | 2553 (5)  | 4285 (10)  | 109 (4)  |
| C (49) | 9899 (10)  | 2497 (5)  | 3248 (12)  | 115 (4)  |
| C (50) | 8866 (7)   | 2199 (4)  | 2991 (9)   | 87 (3)   |
| C (51) | 8626 (7)   | 1942 (4)  | 3840 (8)   | 84 (3)   |
| C (52) | 4540 (4)   | 620 (2)   | 823 (4)    | 34 (1)   |
| C (53) | 4440 (4)   | 1023 (2)  | -127 (4)   | 40 (1)   |
| C (54) | 4513 (4)   | 655 (2)   | -1956 (4)  | 42 (1)   |
| C (55) | 3701 (4)   | 391 (2)   | -2917 (4)  | 43 (1)   |
| C (56) | 3797 (5)   | 221 (2)   | -3910 (4)  | 53 (1)   |
| C (57) | 2876 (6)   | -5 (3)    | -4672 (5)  | 61 (2)   |
| C (58) | 1902 (6)   | -74 (3)   | -4444 (5)  | 64 (2)   |
| C (59) | 1801 (6)   | 83 (3)    | -3423 (5)  | 71 (2)   |
| C (60) | 2710 (4)   | 329 (3)   | -2687 (4)  | 51 (1)   |
| C (61) | 2866 (5)   | 549 (3)   | -1546 (4)  | 52 (1)   |
| C (62) | 3841 (5)   | 1551 (2)  | -3 (5)     | 49 (1)   |
| C (63) | 3310 (7)   | 2102 (3)  | -1779 (6)  | 71 (2)   |
| C (64) | 3476 (10)  | 2532 (4)  | -2431 (7)  | 93 (3)   |
| C (65) | 4350 (9)   | 2868 (3)  | -2043 (8)  | 86 (3)   |
| C (66) | 5077 (8)   | 2805 (4)  | -976 (9)   | 95 (3)   |
| C (67) | 4883 (7)   | 2361 (4)  | -352 (7)   | 85 (2)   |
| C (68) | 3991 (5)   | 2012 (2)  | -756 (5)   | 51 (1)   |
| C (69) | 3383 (5)   | 1199 (2)  | 4302 (5)   | 48 (1)   |
| C (70) | 2748 (9)   | 1526 (4)  | 4839 (9)   | 94 (3)   |
| C (71) | 6636 (6)   | -1169 (3) | 705 (5)    | 56 (2)   |
| C (72) | 7102 (9)   | -1526 (3) | 20 (8)     | 93 (3)   |
| N (7)  | 8545 (12)  | -484 (6)  | 5803 (11)  | 166 (5)  |
| C (73) | 8723 (10)  | -629 (5)  | 4966 (10)  | 113 (3)  |
| C (74) | 8726 (11)  | -871 (6)  | 3986 (10)  | 140 (5)  |
| N (8)  | -1170 (20) | 975 (11)  | -3140 (20) | 298 (11) |
| C (75) | -2180 (30) | 960 (20)  | -3150 (40) | 540 (30) |
| C (76) | -3017 (17) | 630 (9)   | -3831 (17) | 220 (9)  |
| N (9)  | 5550 (20)  | 1924 (11) | -3827 (19) | 282 (10) |
| C (77) | 6500 (20)  | 1924 (12) | -3180 (20) | 253 (11) |
| C (78) | 6940 (19)  | 1870 (10) | -2049 (19) | 241 (10) |

---

Table 3. Bond lengths [Å] and angles [deg] for joef099a.

---

|             |           |
|-------------|-----------|
| Rh(1)-O(1)  | 2.018(4)  |
| Rh(1)-O(9)  | 2.025(3)  |
| Rh(1)-O(13) | 2.033(3)  |
| Rh(1)-O(5)  | 2.054(3)  |
| Rh(1)-N(5)  | 2.241(4)  |
| Rh(1)-Rh(2) | 2.3985(5) |
| Rh(2)-O(14) | 2.033(3)  |
| Rh(2)-O(2)  | 2.028(4)  |
| Rh(2)-O(6)  | 2.035(3)  |
| Rh(2)-O(10) | 2.066(3)  |
| Rh(2)-N(6)  | 2.244(4)  |
| N(1)-C(3)   | 1.388(7)  |
| N(1)-C(10)  | 1.396(7)  |
| N(1)-C(2)   | 1.459(7)  |
| N(2)-C(20)  | 1.387(7)  |
| N(2)-C(19)  | 1.447(6)  |
| N(2)-C(27)  | 1.434(9)  |
| N(3)-C(44)  | 1.387(7)  |
| N(3)-C(37)  | 1.409(7)  |
| N(3)-C(36)  | 1.431(6)  |
| N(4)-C(61)  | 1.381(7)  |
| N(4)-C(54)  | 1.402(6)  |
| N(4)-C(53)  | 1.459(6)  |
| N(5)-C(69)  | 1.119(7)  |
| N(6)-C(71)  | 1.102(7)  |
| O(1)-C(1)   | 1.261(6)  |
| O(2)-C(1)   | 1.268(6)  |
| O(3)-C(3)   | 1.198(8)  |
| O(4)-C(10)  | 1.237(7)  |
| O(5)-C(18)  | 1.272(6)  |
| O(6)-C(18)  | 1.241(6)  |
| O(7)-C(20)  | 1.154(10) |
| O(8)-C(27)  | 1.213(9)  |
| O(9)-C(35)  | 1.246(6)  |
| O(10)-C(35) | 1.262(6)  |
| O(11)-C(37) | 1.185(7)  |
| O(12)-C(44) | 1.231(7)  |
| O(13)-C(52) | 1.268(6)  |
| O(14)-C(52) | 1.268(6)  |
| O(15)-C(54) | 1.209(6)  |
| O(16)-C(61) | 1.210(6)  |
| C(1)-C(2)   | 1.528(7)  |
| C(2)-C(11)  | 1.545(8)  |
| C(3)-C(4)   | 1.478(9)  |
| C(4)-C(9)   | 1.370(10) |
| C(4)-C(5)   | 1.382(9)  |
| C(5)-C(6)   | 1.430(14) |
| C(6)-C(7)   | 1.408(16) |
| C(7)-C(8)   | 1.307(16) |
| C(8)-C(9)   | 1.426(10) |
| C(9)-C(10)  | 1.461(9)  |
| C(11)-C(17) | 1.503(9)  |
| C(12)-C(17) | 1.366(11) |
| C(12)-C(13) | 1.415(14) |
| C(13)-C(14) | 1.340(15) |
| C(14)-C(15) | 1.318(13) |
| C(15)-C(16) | 1.374(10) |

|                |            |
|----------------|------------|
| C (16) -C (17) | 1.394 (10) |
| C (18) -C (19) | 1.532 (7)  |
| C (19) -C (28) | 1.537 (8)  |
| C (20) -C (21) | 1.483 (13) |
| C (21) -C (26) | 1.372 (14) |
| C (21) -C (22) | 1.454 (10) |
| C (22) -C (23) | 1.28 (3)   |
| C (23) -C (24) | 1.32 (4)   |
| C (24) -C (25) | 1.37 (2)   |
| C (25) -C (26) | 1.392 (13) |
| C (26) -C (27) | 1.445 (10) |
| C (28) -C (34) | 1.527 (8)  |
| C (29) -C (30) | 1.350 (9)  |
| C (29) -C (34) | 1.380 (10) |
| C (30) -C (31) | 1.338 (13) |
| C (31) -C (32) | 1.372 (13) |
| C (32) -C (33) | 1.423 (10) |
| C (33) -C (34) | 1.378 (10) |
| C (35) -C (36) | 1.545 (7)  |
| C (36) -C (45) | 1.522 (9)  |
| C (37) -C (38) | 1.468 (8)  |
| C (38) -C (43) | 1.369 (8)  |
| C (38) -C (39) | 1.399 (7)  |
| C (39) -C (40) | 1.363 (10) |
| C (40) -C (41) | 1.374 (11) |
| C (41) -C (42) | 1.412 (10) |
| C (42) -C (43) | 1.384 (8)  |
| C (43) -C (44) | 1.484 (7)  |
| C (45) -C (51) | 1.537 (10) |
| C (46) -C (51) | 1.376 (14) |
| C (46) -C (47) | 1.379 (14) |
| C (47) -C (48) | 1.399 (16) |
| C (48) -C (49) | 1.340 (15) |
| C (49) -C (50) | 1.443 (13) |
| C (50) -C (51) | 1.357 (12) |
| C (52) -C (53) | 1.528 (7)  |
| C (53) -C (62) | 1.527 (7)  |
| C (54) -C (55) | 1.478 (8)  |
| C (55) -C (56) | 1.365 (7)  |
| C (55) -C (60) | 1.381 (7)  |
| C (56) -C (57) | 1.379 (9)  |
| C (57) -C (58) | 1.361 (10) |
| C (58) -C (59) | 1.392 (9)  |
| C (59) -C (60) | 1.375 (9)  |
| C (60) -C (61) | 1.497 (7)  |
| C (62) -C (68) | 1.523 (7)  |
| C (63) -C (68) | 1.335 (9)  |
| C (63) -C (64) | 1.390 (11) |
| C (64) -C (65) | 1.341 (14) |
| C (65) -C (66) | 1.389 (14) |
| C (66) -C (67) | 1.405 (11) |
| C (67) -C (68) | 1.381 (10) |
| C (69) -C (70) | 1.443 (10) |
| C (71) -C (72) | 1.474 (8)  |
| N (7) -C (73)  | 1.204 (14) |
| C (73) -C (74) | 1.375 (14) |
| N (8) -C (75)  | 1.28 (2)   |
| C (75) -C (76) | 1.40 (2)   |
| N (9) -C (77)  | 1.222 (19) |
| C (77) -C (78) | 1.380 (19) |

|                        |             |
|------------------------|-------------|
| O (1) -Rh (1) -O (9)   | 176.19 (14) |
| O (1) -Rh (1) -O (13)  | 93.35 (15)  |
| O (9) -Rh (1) -O (13)  | 86.00 (15)  |
| O (1) -Rh (1) -O (5)   | 87.34 (15)  |
| O (9) -Rh (1) -O (5)   | 93.01 (15)  |
| O (13) -Rh (1) -O (5)  | 175.33 (13) |
| O (1) -Rh (1) -N (5)   | 93.18 (14)  |
| O (9) -Rh (1) -N (5)   | 90.59 (14)  |
| O (13) -Rh (1) -N (5)  | 91.32 (14)  |
| O (5) -Rh (1) -N (5)   | 93.25 (14)  |
| O (1) -Rh (1) -Rh (2)  | 87.87 (10)  |
| O (9) -Rh (1) -Rh (2)  | 88.35 (10)  |
| O (13) -Rh (1) -Rh (2) | 87.85 (9)   |
| O (5) -Rh (1) -Rh (2)  | 87.56 (9)   |
| N (5) -Rh (1) -Rh (2)  | 178.70 (10) |
| O (14) -Rh (2) -O (2)  | 92.89 (15)  |
| O (14) -Rh (2) -O (6)  | 176.40 (14) |
| O (2) -Rh (2) -O (6)   | 87.15 (14)  |
| O (14) -Rh (2) -O (10) | 87.25 (16)  |
| O (2) -Rh (2) -O (10)  | 175.42 (14) |
| O (6) -Rh (2) -O (10)  | 92.43 (14)  |
| O (14) -Rh (2) -N (6)  | 90.66 (16)  |
| O (2) -Rh (2) -N (6)   | 92.88 (15)  |
| O (6) -Rh (2) -N (6)   | 92.94 (16)  |
| O (10) -Rh (2) -N (6)  | 91.70 (15)  |
| O (14) -Rh (2) -Rh (1) | 88.42 (10)  |
| O (2) -Rh (2) -Rh (1)  | 87.98 (10)  |
| O (6) -Rh (2) -Rh (1)  | 87.98 (10)  |
| O (10) -Rh (2) -Rh (1) | 87.44 (9)   |
| N (6) -Rh (2) -Rh (1)  | 178.77 (12) |
| C (3) -N (1) -C (10)   | 111.0 (5)   |
| C (3) -N (1) -C (2)    | 122.8 (5)   |
| C (10) -N (1) -C (2)   | 125.7 (4)   |
| C (20) -N (2) -C (19)  | 126.2 (6)   |
| C (20) -N (2) -C (27)  | 110.8 (6)   |
| C (19) -N (2) -C (27)  | 122.6 (5)   |
| C (44) -N (3) -C (37)  | 111.4 (4)   |
| C (44) -N (3) -C (36)  | 125.0 (5)   |
| C (37) -N (3) -C (36)  | 122.4 (5)   |
| C (61) -N (4) -C (54)  | 112.3 (4)   |
| C (61) -N (4) -C (53)  | 124.6 (4)   |
| C (54) -N (4) -C (53)  | 122.9 (4)   |
| C (69) -N (5) -Rh (1)  | 174.4 (4)   |
| C (71) -N (6) -Rh (2)  | 172.3 (5)   |
| C (1) -O (1) -Rh (1)   | 118.3 (3)   |
| C (1) -O (2) -Rh (2)   | 118.0 (3)   |
| C (18) -O (5) -Rh (1)  | 118.1 (3)   |
| C (18) -O (6) -Rh (2)  | 119.1 (3)   |
| C (35) -O (9) -Rh (1)  | 118.6 (3)   |
| C (35) -O (10) -Rh (2) | 117.3 (3)   |
| C (52) -O (13) -Rh (1) | 118.1 (3)   |
| C (52) -O (14) -Rh (2) | 117.3 (3)   |
| O (2) -C (1) -O (1)    | 126.5 (5)   |
| O (2) -C (1) -C (2)    | 117.6 (5)   |
| O (1) -C (1) -C (2)    | 115.9 (4)   |
| N (1) -C (2) -C (1)    | 112.0 (4)   |
| N (1) -C (2) -C (11)   | 112.3 (4)   |
| C (1) -C (2) -C (11)   | 112.8 (5)   |
| O (3) -C (3) -N (1)    | 125.5 (6)   |
| O (3) -C (3) -C (4)    | 128.8 (6)   |
| N (1) -C (3) -C (4)    | 105.7 (5)   |

|                       |           |
|-----------------------|-----------|
| C(9) - C(4) - C(5)    | 121.9(7)  |
| C(9) - C(4) - C(3)    | 108.6(5)  |
| C(5) - C(4) - C(3)    | 129.4(7)  |
| C(4) - C(5) - C(6)    | 114.8(9)  |
| C(7) - C(6) - C(5)    | 121.7(8)  |
| C(8) - C(7) - C(6)    | 122.0(9)  |
| C(7) - C(8) - C(9)    | 117.3(10) |
| C(4) - C(9) - C(8)    | 122.0(7)  |
| C(4) - C(9) - C(10)   | 108.0(5)  |
| C(8) - C(9) - C(10)   | 129.9(7)  |
| O(4) - C(10) - N(1)   | 124.1(6)  |
| O(4) - C(10) - C(9)   | 129.2(6)  |
| N(1) - C(10) - C(9)   | 106.6(5)  |
| C(17) - C(11) - C(2)  | 113.6(5)  |
| C(17) - C(12) - C(13) | 119.3(9)  |
| C(14) - C(13) - C(12) | 120.2(9)  |
| C(15) - C(14) - C(13) | 122.5(8)  |
| C(14) - C(15) - C(16) | 117.7(9)  |
| C(15) - C(16) - C(17) | 123.6(8)  |
| C(12) - C(17) - C(16) | 116.4(7)  |
| C(12) - C(17) - C(11) | 122.8(7)  |
| C(16) - C(17) - C(11) | 120.7(7)  |
| O(6) - C(18) - O(5)   | 126.5(5)  |
| O(6) - C(18) - C(19)  | 117.1(4)  |
| O(5) - C(18) - C(19)  | 116.3(4)  |
| N(2) - C(19) - C(18)  | 112.5(4)  |
| N(2) - C(19) - C(28)  | 110.4(5)  |
| C(18) - C(19) - C(28) | 112.9(4)  |
| O(7) - C(20) - N(2)   | 124.0(8)  |
| O(7) - C(20) - C(21)  | 131.8(7)  |
| N(2) - C(20) - C(21)  | 104.2(8)  |
| C(26) - C(21) - C(22) | 122.0(12) |
| C(26) - C(21) - C(20) | 111.1(6)  |
| C(22) - C(21) - C(20) | 126.7(13) |
| C(23) - C(22) - C(21) | 118.2(19) |
| C(22) - C(23) - C(24) | 120.3(13) |
| C(23) - C(24) - C(25) | 126(2)    |
| C(26) - C(25) - C(24) | 117.5(19) |
| C(25) - C(26) - C(21) | 116.3(11) |
| C(25) - C(26) - C(27) | 136.9(13) |
| C(21) - C(26) - C(27) | 106.7(7)  |
| O(8) - C(27) - N(2)   | 125.1(6)  |
| O(8) - C(27) - C(26)  | 127.7(8)  |
| N(2) - C(27) - C(26)  | 107.2(7)  |
| C(34) - C(28) - C(19) | 110.9(5)  |
| C(30) - C(29) - C(34) | 121.6(7)  |
| C(29) - C(30) - C(31) | 121.3(8)  |
| C(32) - C(31) - C(30) | 120.4(7)  |
| C(31) - C(32) - C(33) | 118.9(8)  |
| C(34) - C(33) - C(32) | 119.6(8)  |
| C(33) - C(34) - C(29) | 118.1(6)  |
| C(33) - C(34) - C(28) | 119.8(7)  |
| C(29) - C(34) - C(28) | 122.0(6)  |
| O(9) - C(35) - O(10)  | 127.8(5)  |
| O(9) - C(35) - C(36)  | 115.3(4)  |
| O(10) - C(35) - C(36) | 116.9(4)  |
| N(3) - C(36) - C(45)  | 111.9(5)  |
| N(3) - C(36) - C(35)  | 112.3(4)  |
| C(45) - C(36) - C(35) | 113.2(5)  |
| O(11) - C(37) - N(3)  | 124.0(5)  |
| O(11) - C(37) - C(38) | 130.7(5)  |



|                     |           |
|---------------------|-----------|
| N(3) -C(37) -C(38)  | 105.2(5)  |
| C(43) -C(38) -C(39) | 121.5(6)  |
| C(43) -C(38) -C(37) | 109.4(5)  |
| C(39) -C(38) -C(37) | 129.0(6)  |
| C(40) -C(39) -C(38) | 118.0(6)  |
| C(39) -C(40) -C(41) | 120.2(6)  |
| C(40) -C(41) -C(42) | 123.0(6)  |
| C(43) -C(42) -C(41) | 115.3(7)  |
| C(38) -C(43) -C(42) | 121.8(5)  |
| C(38) -C(43) -C(44) | 107.8(5)  |
| C(42) -C(43) -C(44) | 130.3(6)  |
| O(12) -C(44) -N(3)  | 124.4(5)  |
| O(12) -C(44) -C(43) | 129.6(6)  |
| N(3) -C(44) -C(43)  | 106.0(4)  |
| C(51) -C(45) -C(36) | 110.6(6)  |
| C(51) -C(46) -C(47) | 118.4(11) |
| C(46) -C(47) -C(48) | 123.0(12) |
| C(49) -C(48) -C(47) | 116.6(10) |
| C(48) -C(49) -C(50) | 122.6(11) |
| C(51) -C(50) -C(49) | 117.5(10) |
| C(50) -C(51) -C(46) | 121.7(8)  |
| C(50) -C(51) -C(45) | 120.5(9)  |
| C(46) -C(51) -C(45) | 117.8(8)  |
| O(13) -C(52) -O(14) | 127.4(5)  |
| O(13) -C(52) -C(53) | 117.0(4)  |
| O(14) -C(52) -C(53) | 115.4(4)  |
| N(4) -C(53) -C(52)  | 110.8(4)  |
| N(4) -C(53) -C(62)  | 112.1(4)  |
| C(52) -C(53) -C(62) | 112.6(4)  |
| O(15) -C(54) -N(4)  | 124.2(5)  |
| O(15) -C(54) -C(55) | 130.4(4)  |
| N(4) -C(54) -C(55)  | 105.4(4)  |
| C(56) -C(55) -C(60) | 120.4(5)  |
| C(56) -C(55) -C(54) | 130.9(5)  |
| C(60) -C(55) -C(54) | 108.6(4)  |
| C(55) -C(56) -C(57) | 118.1(5)  |
| C(58) -C(57) -C(56) | 121.7(5)  |
| C(57) -C(58) -C(59) | 120.8(6)  |
| C(60) -C(59) -C(58) | 117.0(6)  |
| C(59) -C(60) -C(55) | 121.9(5)  |
| C(59) -C(60) -C(61) | 130.2(5)  |
| C(55) -C(60) -C(61) | 107.8(5)  |
| O(16) -C(61) -N(4)  | 124.3(5)  |
| O(16) -C(61) -C(60) | 130.1(6)  |
| N(4) -C(61) -C(60)  | 105.5(4)  |
| C(68) -C(62) -C(53) | 113.3(4)  |
| C(68) -C(63) -C(64) | 122.1(8)  |
| C(65) -C(64) -C(63) | 120.0(9)  |
| C(64) -C(65) -C(66) | 120.9(7)  |
| C(67) -C(66) -C(65) | 117.0(9)  |
| C(68) -C(67) -C(66) | 122.1(8)  |
| C(63) -C(68) -C(67) | 117.8(6)  |
| C(63) -C(68) -C(62) | 124.3(6)  |
| C(67) -C(68) -C(62) | 117.9(6)  |
| N(5) -C(69) -C(70)  | 176.9(7)  |
| N(6) -C(71) -C(72)  | 176.7(8)  |
| N(7) -C(73) -C(74)  | 167.1(15) |
| N(8) -C(75) -C(76)  | 126(3)    |
| N(9) -C(77) -C(78)  | 134(3)    |

Symmetry transformations used to generate equivalent atoms:

Table 4. Anisotropic displacement parameters ( $\text{Å}^2 \times 10^3$ ) for joef099a.  
 The anisotropic displacement factor exponent takes the form:  
 $-2 \pi^2 [ h^2 a^{*2} U_{11} + \dots + 2 h k a^* b^* U_{12} ]$

|       | U11     | U22     | U33     | U23     | U13     | U12     |
|-------|---------|---------|---------|---------|---------|---------|
| Rh(1) | 36(1)   | 35(1)   | 31(1)   | 0(1)    | 19(1)   | 2(1)    |
| Rh(2) | 36(1)   | 36(1)   | 31(1)   | 0(1)    | 19(1)   | 3(1)    |
| N(1)  | 36(2)   | 48(2)   | 54(2)   | -2(2)   | 25(2)   | -3(2)   |
| N(2)  | 64(3)   | 46(2)   | 43(2)   | 4(2)    | 32(2)   | 6(2)    |
| N(3)  | 36(2)   | 50(2)   | 49(2)   | -3(2)   | 22(2)   | -8(2)   |
| N(4)  | 47(2)   | 48(2)   | 40(2)   | 7(2)    | 25(2)   | 2(2)    |
| N(5)  | 34(2)   | 35(2)   | 45(2)   | 0(2)    | 30(2)   | -4(2)   |
| N(6)  | 46(2)   | 43(3)   | 46(2)   | -5(2)   | 25(2)   | -1(2)   |
| O(1)  | 35(2)   | 42(2)   | 45(2)   | -4(2)   | 21(1)   | 1(1)    |
| O(2)  | 40(2)   | 41(2)   | 43(2)   | -4(2)   | 18(2)   | 1(2)    |
| O(3)  | 57(2)   | 85(3)   | 68(3)   | -1(2)   | 42(2)   | -6(2)   |
| O(4)  | 81(3)   | 112(4)  | 57(3)   | 5(3)    | 35(2)   | 10(3)   |
| O(5)  | 47(2)   | 44(2)   | 33(2)   | 2(1)    | 23(1)   | 8(2)    |
| O(6)  | 36(2)   | 43(2)   | 38(2)   | 3(1)    | 20(1)   | 6(1)    |
| O(7)  | 139(5)  | 99(5)   | 50(3)   | -20(3)  | 22(3)   | 9(4)    |
| O(8)  | 70(3)   | 68(3)   | 93(4)   | -14(3)  | 17(3)   | -4(2)   |
| O(9)  | 38(2)   | 46(2)   | 44(2)   | -10(2)  | 25(2)   | -4(2)   |
| O(10) | 36(2)   | 43(2)   | 46(2)   | -7(1)   | 26(1)   | -5(1)   |
| O(11) | 53(2)   | 99(4)   | 60(3)   | 7(2)    | 18(2)   | 7(2)    |
| O(12) | 43(2)   | 70(3)   | 76(3)   | 9(2)    | 18(2)   | 7(2)    |
| O(13) | 49(2)   | 40(2)   | 34(2)   | 3(1)    | 27(1)   | 6(1)    |
| O(14) | 57(2)   | 42(2)   | 33(2)   | 5(1)    | 25(2)   | 9(2)    |
| O(15) | 51(2)   | 72(3)   | 63(2)   | -5(2)   | 39(2)   | -3(2)   |
| O(16) | 54(2)   | 124(4)  | 65(3)   | -12(3)  | 43(2)   | -10(2)  |
| C(1)  | 33(2)   | 45(3)   | 37(2)   | 4(2)    | 14(2)   | 3(2)    |
| C(2)  | 40(2)   | 41(3)   | 46(3)   | 0(2)    | 13(2)   | -1(2)   |
| C(3)  | 42(3)   | 45(3)   | 66(3)   | -8(3)   | 21(2)   | -11(2)  |
| C(4)  | 41(3)   | 45(3)   | 94(4)   | 1(3)    | 26(3)   | -7(2)   |
| C(5)  | 41(3)   | 50(4)   | 149(7)  | 5(4)    | 23(4)   | -5(3)   |
| C(6)  | 47(4)   | 63(5)   | 189(12) | 15(6)   | 3(6)    | -2(3)   |
| C(7)  | 79(7)   | 100(8)  | 140(10) | 39(7)   | -36(6)  | -14(5)  |
| C(8)  | 73(5)   | 110(7)  | 94(6)   | 34(6)   | 1(4)    | -8(5)   |
| C(9)  | 49(3)   | 62(4)   | 73(4)   | 12(3)   | 7(3)    | -9(3)   |
| C(10) | 51(3)   | 65(4)   | 50(3)   | 1(3)    | 17(2)   | -3(3)   |
| C(11) | 45(3)   | 43(3)   | 74(4)   | -8(3)   | 10(3)   | -2(2)   |
| C(12) | 199(12) | 85(6)   | 104(7)  | -23(5)  | 86(8)   | -73(8)  |
| C(13) | 210(13) | 121(10) | 166(11) | -30(8)  | 149(11) | -85(10) |
| C(14) | 69(5)   | 82(6)   | 147(9)  | -21(6)  | 48(6)   | -25(4)  |
| C(15) | 79(5)   | 54(4)   | 88(5)   | 2(4)    | 6(4)    | -12(3)  |
| C(16) | 68(4)   | 54(4)   | 81(5)   | 12(3)   | -3(4)   | -11(3)  |
| C(17) | 52(3)   | 38(3)   | 73(4)   | -3(3)   | 21(3)   | 2(2)    |
| C(18) | 35(2)   | 43(3)   | 33(2)   | 2(2)    | 16(2)   | -2(2)   |
| C(19) | 44(2)   | 46(3)   | 37(2)   | 3(2)    | 19(2)   | 8(2)    |
| C(20) | 134(7)  | 50(3)   | 47(3)   | 12(3)   | 50(4)   | 29(4)   |
| C(21) | 158(9)  | 61(4)   | 134(8)  | 46(5)   | 128(8)  | 38(5)   |
| C(22) | 430(30) | 111(8)  | 213(14) | 93(9)   | 290(19) | 126(13) |
| C(23) | 430(40) | 110(11) | 310(30) | 114(14) | 340(30) | 131(17) |
| C(24) | 340(30) | 127(14) | 510(50) | 100(20) | 390(40) | 54(16)  |
| C(25) | 117(8)  | 81(6)   | 282(18) | 26(9)   | 121(11) | 5(6)    |
| C(26) | 103(6)  | 56(4)   | 137(8)  | 22(5)   | 84(6)   | 12(4)   |
| C(27) | 61(4)   | 43(3)   | 100(5)  | 16(3)   | 47(4)   | 9(3)    |

|        |         |          |          |         |        |         |
|--------|---------|----------|----------|---------|--------|---------|
| C (28) | 61 (3)  | 55 (3)   | 46 (3)   | 10 (2)  | 29 (3) | 17 (3)  |
| C (29) | 58 (4)  | 77 (4)   | 65 (4)   | 18 (3)  | 24 (3) | 20 (3)  |
| C (30) | 81 (5)  | 89 (5)   | 70 (4)   | 28 (4)  | 30 (4) | 36 (4)  |
| C (31) | 154 (9) | 76 (5)   | 64 (5)   | 28 (4)  | 43 (5) | 43 (6)  |
| C (32) | 130 (7) | 56 (4)   | 76 (5)   | 9 (3)   | 63 (5) | -11 (4) |
| C (33) | 124 (6) | 56 (4)   | 63 (4)   | 6 (3)   | 46 (4) | 17 (4)  |
| C (34) | 81 (4)  | 42 (3)   | 60 (3)   | 9 (2)   | 44 (3) | 18 (3)  |
| C (35) | 37 (2)  | 49 (3)   | 34 (2)   | -4 (2)  | 20 (2) | -2 (2)  |
| C (36) | 38 (2)  | 54 (3)   | 62 (3)   | -12 (3) | 26 (2) | -8 (2)  |
| C (37) | 36 (2)  | 54 (3)   | 55 (3)   | -6 (2)  | 15 (2) | -5 (2)  |
| C (38) | 43 (3)  | 46 (3)   | 59 (3)   | -1 (2)  | 27 (2) | -4 (2)  |
| C (39) | 43 (3)  | 57 (3)   | 98 (5)   | -8 (3)  | 32 (3) | 2 (2)   |
| C (40) | 58 (3)  | 81 (5)   | 94 (5)   | 7 (4)   | 60 (4) | 5 (3)   |
| C (41) | 99 (5)  | 71 (4)   | 96 (5)   | 22 (4)  | 75 (5) | 9 (4)   |
| C (42) | 80 (4)  | 67 (4)   | 65 (4)   | 14 (3)  | 40 (3) | -1 (3)  |
| C (43) | 51 (3)  | 44 (3)   | 68 (3)   | 3 (2)   | 34 (3) | -6 (2)  |
| C (44) | 44 (3)  | 48 (3)   | 60 (3)   | 6 (2)   | 16 (2) | -4 (2)  |
| C (45) | 66 (4)  | 58 (4)   | 131 (7)  | -43 (4) | 70 (4) | -24 (3) |
| C (46) | 134 (9) | 157 (10) | 120 (8)  | -76 (8) | 80 (7) | -92 (8) |
| C (47) | 121 (9) | 132 (9)  | 166 (12) | -69 (9) | 78 (9) | -56 (8) |
| C (48) | 79 (6)  | 125 (8)  | 132 (9)  | -34 (7) | 46 (6) | -41 (6) |
| C (49) | 122 (8) | 81 (7)   | 165 (11) | -15 (7) | 75 (8) | -35 (6) |
| C (50) | 81 (5)  | 70 (5)   | 133 (8)  | -17 (5) | 65 (5) | -24 (4) |
| C (51) | 91 (5)  | 66 (5)   | 113 (7)  | -35 (5) | 58 (5) | -28 (4) |
| C (52) | 37 (2)  | 39 (3)   | 28 (2)   | -2 (2)  | 13 (2) | 2 (2)   |
| C (53) | 52 (3)  | 41 (3)   | 35 (2)   | 5 (2)   | 24 (2) | 3 (2)   |
| C (54) | 51 (3)  | 43 (3)   | 38 (2)   | 8 (2)   | 23 (2) | 15 (2)  |
| C (55) | 53 (3)  | 43 (3)   | 42 (2)   | 9 (2)   | 29 (2) | 7 (2)   |
| C (56) | 73 (3)  | 51 (3)   | 44 (3)   | 3 (2)   | 32 (3) | 11 (3)  |
| C (57) | 88 (4)  | 61 (4)   | 36 (3)   | 2 (2)   | 23 (3) | 9 (3)   |
| C (58) | 74 (4)  | 65 (4)   | 50 (3)   | 0 (3)   | 14 (3) | -8 (3)  |
| C (59) | 73 (4)  | 86 (5)   | 53 (3)   | 3 (3)   | 19 (3) | 3 (4)   |
| C (60) | 57 (3)  | 60 (3)   | 40 (2)   | 6 (3)   | 20 (2) | 8 (3)   |
| C (61) | 54 (3)  | 70 (4)   | 39 (2)   | 3 (2)   | 26 (2) | 14 (3)  |
| C (62) | 70 (4)  | 45 (3)   | 44 (3)   | 6 (2)   | 36 (3) | 11 (3)  |
| C (63) | 93 (5)  | 57 (4)   | 62 (4)   | 12 (3)  | 20 (4) | 4 (3)   |
| C (64) | 157 (9) | 69 (5)   | 64 (5)   | 19 (4)  | 52 (5) | 23 (6)  |
| C (65) | 146 (8) | 52 (4)   | 95 (6)   | 23 (4)  | 88 (6) | 19 (5)  |
| C (66) | 105 (6) | 74 (5)   | 125 (8)  | 21 (5)  | 62 (6) | -11 (5) |
| C (67) | 79 (5)  | 93 (6)   | 81 (5)   | 21 (4)  | 21 (4) | -21 (4) |
| C (68) | 69 (3)  | 41 (3)   | 53 (3)   | 12 (2)  | 36 (3) | 10 (3)  |
| C (69) | 55 (3)  | 45 (3)   | 56 (3)   | 1 (2)   | 33 (3) | -2 (2)  |
| C (70) | 129 (8) | 69 (5)   | 114 (7)  | -18 (5) | 82 (7) | -3 (5)  |
| C (71) | 83 (4)  | 42 (3)   | 57 (3)   | -12 (3) | 42 (3) | -2 (3)  |
| C (72) | 159 (8) | 53 (4)   | 103 (6)  | -11 (4) | 95 (6) | 28 (5)  |

---

Table 5. Hydrogen coordinates ( $\times 10^4$ ) and isotropic displacement parameters ( $\text{\AA}^2 \times 10^3$ ) for joef099a.

|        | x     | y     | z     | U(eq) |
|--------|-------|-------|-------|-------|
| H(2A)  | 2261  | -1036 | 2664  | 51    |
| H(5A)  | -1775 | -217  | 1489  | 98    |
| H(6A)  | -3012 | 79    | -271  | 129   |
| H(7A)  | -2562 | -61   | -1903 | 147   |
| H(8A)  | -835  | -326  | -1862 | 118   |
| H(11A) | 2587  | -1487 | 702   | 67    |
| H(11B) | 3151  | -1708 | 1937  | 67    |
| H(12A) | 1299  | -1817 | 2807  | 144   |
| H(13A) | -146  | -2471 | 2528  | 174   |
| H(14A) | -876  | -2874 | 844   | 115   |
| H(15A) | -71   | -2779 | -517  | 94    |
| H(16A) | 1329  | -2137 | -286  | 89    |
| H(19A) | 6573  | -834  | 5906  | 49    |
| H(22A) | 4078  | -916  | 8616  | 252   |
| H(23A) | 2367  | -1216 | 8477  | 279   |
| H(24A) | 1240  | -1513 | 6860  | 319   |
| H(25A) | 1774  | -1635 | 5296  | 176   |
| H(28A) | 5701  | -1759 | 4510  | 62    |
| H(28B) | 6948  | -1536 | 4780  | 62    |
| H(29A) | 8053  | -1505 | 6948  | 79    |
| H(30A) | 8540  | -2019 | 8526  | 94    |
| H(31A) | 7536  | -2770 | 8694  | 115   |
| H(32A) | 5881  | -2976 | 7321  | 96    |
| H(33A) | 5347  | -2443 | 5663  | 92    |
| H(36A) | 8359  | 859   | 4231  | 58    |
| H(39A) | 11706 | 639   | 2670  | 76    |
| H(40A) | 11934 | 715   | 923   | 83    |
| H(41A) | 10493 | 1024  | -556  | 94    |
| H(42A) | 8677  | 1154  | -424  | 80    |
| H(45A) | 7017  | 1703  | 2934  | 91    |
| H(45B) | 7277  | 1611  | 4242  | 91    |
| H(46A) | 9125  | 1808  | 5504  | 153   |
| H(47A) | 10727 | 2332  | 5869  | 158   |
| H(48A) | 11253 | 2758  | 4443  | 131   |
| H(49A) | 10101 | 2661  | 2657  | 139   |
| H(50A) | 8372  | 2182  | 2255  | 105   |
| H(53A) | 5213  | 1127  | -98   | 48    |
| H(56A) | 4479  | 258   | -4072 | 63    |
| H(57A) | 2923  | -116  | -5375 | 73    |
| H(58A) | 1282  | -231  | -4988 | 77    |
| H(59A) | 1134  | 23    | -3244 | 85    |
| H(62A) | 3037  | 1473  | -172  | 58    |
| H(62B) | 4122  | 1676  | 778   | 58    |
| H(63A) | 2693  | 1866  | -2070 | 86    |
| H(64A) | 2970  | 2588  | -3152 | 111   |
| H(65A) | 4474  | 3152  | -2503 | 103   |
| H(66A) | 5678  | 3050  | -681  | 114   |
| H(67A) | 5381  | 2300  | 371   | 102   |
| H(70A) | 2460  | 1851  | 4389  | 141   |
| H(70B) | 3226  | 1639  | 5573  | 141   |
| H(70C) | 2126  | 1309  | 4921  | 141   |
| H(72A) | 7845  | -1648 | 460   | 139   |

|         |       |       |       |     |
|---------|-------|-------|-------|-----|
| H (72B) | 7152  | -1321 | -628  | 139 |
| H (72C) | 6618  | -1845 | -226  | 139 |
| H (74A) | 9405  | -769  | 3818  | 209 |
| H (74B) | 8076  | -746  | 3386  | 209 |
| H (74C) | 8696  | -1270 | 4057  | 209 |
| H (76A) | -3683 | 654   | -3594 | 331 |
| H (76B) | -2760 | 249   | -3775 | 331 |
| H (76C) | -3194 | 754   | -4602 | 331 |
| H (78A) | 7745  | 1927  | -1829 | 362 |
| H (78B) | 6782  | 1502  | -1828 | 362 |
| H (78C) | 6604  | 2143  | -1683 | 362 |

---

Table 6. Torsion angles [deg] for joe099a.

---

|                         |            |
|-------------------------|------------|
| O(1)-Rh(1)-Rh(2)-O(14)  | 88.29(15)  |
| O(9)-Rh(1)-Rh(2)-O(14)  | -91.20(16) |
| O(13)-Rh(1)-Rh(2)-O(14) | -5.14(15)  |
| O(5)-Rh(1)-Rh(2)-O(14)  | 175.72(17) |
| N(5)-Rh(1)-Rh(2)-O(14)  | -56(5)     |
| O(1)-Rh(1)-Rh(2)-O(2)   | -4.65(14)  |
| O(9)-Rh(1)-Rh(2)-O(2)   | 175.85(16) |
| O(13)-Rh(1)-Rh(2)-O(2)  | -98.09(14) |
| O(5)-Rh(1)-Rh(2)-O(2)   | 82.77(14)  |
| N(5)-Rh(1)-Rh(2)-O(2)   | -149(5)    |
| O(1)-Rh(1)-Rh(2)-O(6)   | -91.87(15) |
| O(9)-Rh(1)-Rh(2)-O(6)   | 88.64(14)  |
| O(13)-Rh(1)-Rh(2)-O(6)  | 174.70(15) |
| O(5)-Rh(1)-Rh(2)-O(6)   | -4.44(14)  |
| N(5)-Rh(1)-Rh(2)-O(6)   | 124(5)     |
| O(1)-Rh(1)-Rh(2)-O(10)  | 175.60(16) |
| O(9)-Rh(1)-Rh(2)-O(10)  | -3.89(14)  |
| O(13)-Rh(1)-Rh(2)-O(10) | 82.17(15)  |
| O(5)-Rh(1)-Rh(2)-O(10)  | -96.97(14) |
| N(5)-Rh(1)-Rh(2)-O(10)  | 31(5)      |
| O(1)-Rh(1)-Rh(2)-N(6)   | 130(6)     |
| O(9)-Rh(1)-Rh(2)-N(6)   | -49(6)     |
| O(13)-Rh(1)-Rh(2)-N(6)  | 37(6)      |
| O(5)-Rh(1)-Rh(2)-N(6)   | -143(6)    |
| N(5)-Rh(1)-Rh(2)-N(6)   | -14(7)     |
| O(1)-Rh(1)-N(5)-C(69)   | 17(5)      |
| O(9)-Rh(1)-N(5)-C(69)   | -163(5)    |
| O(13)-Rh(1)-N(5)-C(69)  | 111(5)     |
| O(5)-Rh(1)-N(5)-C(69)   | -70(5)     |
| Rh(2)-Rh(1)-N(5)-C(69)  | 161(4)     |
| O(14)-Rh(2)-N(6)-C(71)  | -45(4)     |
| O(2)-Rh(2)-N(6)-C(71)   | 48(4)      |
| O(6)-Rh(2)-N(6)-C(71)   | 135(4)     |
| O(10)-Rh(2)-N(6)-C(71)  | -132(4)    |
| Rh(1)-Rh(2)-N(6)-C(71)  | -86(7)     |
| O(9)-Rh(1)-O(1)-C(1)    | 18(3)      |
| O(13)-Rh(1)-O(1)-C(1)   | 98.4(4)    |
| O(5)-Rh(1)-O(1)-C(1)    | -76.9(3)   |
| N(5)-Rh(1)-O(1)-C(1)    | -170.1(3)  |
| Rh(2)-Rh(1)-O(1)-C(1)   | 10.7(3)    |
| O(14)-Rh(2)-O(2)-C(1)   | -88.2(4)   |
| O(6)-Rh(2)-O(2)-C(1)    | 88.2(4)    |
| O(10)-Rh(2)-O(2)-C(1)   | 3(2)       |
| N(6)-Rh(2)-O(2)-C(1)    | -179.0(4)  |
| Rh(1)-Rh(2)-O(2)-C(1)   | 0.2(3)     |
| O(1)-Rh(1)-O(5)-C(18)   | 90.2(4)    |
| O(9)-Rh(1)-O(5)-C(18)   | -86.0(4)   |
| O(13)-Rh(1)-O(5)-C(18)  | -8(2)      |
| N(5)-Rh(1)-O(5)-C(18)   | -176.8(4)  |
| Rh(2)-Rh(1)-O(5)-C(18)  | 2.2(3)     |
| O(14)-Rh(2)-O(6)-C(18)  | 11(3)      |
| O(2)-Rh(2)-O(6)-C(18)   | -79.7(4)   |
| O(10)-Rh(2)-O(6)-C(18)  | 95.8(4)    |
| N(6)-Rh(2)-O(6)-C(18)   | -172.4(4)  |
| Rh(1)-Rh(2)-O(6)-C(18)  | 8.4(4)     |
| O(1)-Rh(1)-O(9)-C(35)   | 0(3)       |
| O(13)-Rh(1)-O(9)-C(35)  | -80.7(4)   |

|                                |            |
|--------------------------------|------------|
| O (5) -Rh (1) -O (9) -C (35)   | 94.7 (4)   |
| N (5) -Rh (1) -O (9) -C (35)   | -172.0 (4) |
| Rh (2) -Rh (1) -O (9) -C (35)  | 7.3 (4)    |
| O (14) -Rh (2) -O (10) -C (35) | 90.5 (4)   |
| O (2) -Rh (2) -O (10) -C (35)  | -1 (2)     |
| O (6) -Rh (2) -O (10) -C (35)  | -86.0 (4)  |
| N (6) -Rh (2) -O (10) -C (35)  | -179.0 (4) |
| Rh (1) -Rh (2) -O (10) -C (35) | 1.9 (3)    |
| O (1) -Rh (1) -O (13) -C (52)  | -85.1 (4)  |
| O (9) -Rh (1) -O (13) -C (52)  | 91.1 (4)   |
| O (5) -Rh (1) -O (13) -C (52)  | 13 (2)     |
| N (5) -Rh (1) -O (13) -C (52)  | -178.4 (4) |
| Rh (2) -Rh (1) -O (13) -C (52) | 2.6 (3)    |
| O (2) -Rh (2) -O (14) -C (52)  | 97.1 (4)   |
| O (6) -Rh (2) -O (14) -C (52)  | 7 (3)      |
| O (10) -Rh (2) -O (14) -C (52) | -78.3 (4)  |
| N (6) -Rh (2) -O (14) -C (52)  | -170.0 (4) |
| Rh (1) -Rh (2) -O (14) -C (52) | 9.2 (3)    |
| Rh (2) -O (2) -C (1) -O (1)    | 8.9 (7)    |
| Rh (2) -O (2) -C (1) -C (2)    | -169.5 (3) |
| Rh (1) -O (1) -C (1) -O (2)    | -14.6 (7)  |
| Rh (1) -O (1) -C (1) -C (2)    | 163.9 (3)  |
| C (3) -N (1) -C (2) -C (1)     | -113.4 (5) |
| C (10) -N (1) -C (2) -C (1)    | 75.9 (6)   |
| C (3) -N (1) -C (2) -C (11)    | 118.5 (6)  |
| C (10) -N (1) -C (2) -C (11)   | -52.2 (7)  |
| O (2) -C (1) -C (2) -N (1)     | -125.3 (5) |
| O (1) -C (1) -C (2) -N (1)     | 56.1 (6)   |
| O (2) -C (1) -C (2) -C (11)    | 2.5 (7)    |
| O (1) -C (1) -C (2) -C (11)    | -176.1 (5) |
| C (10) -N (1) -C (3) -O (3)    | 179.0 (6)  |
| C (2) -N (1) -C (3) -O (3)     | 7.0 (9)    |
| C (10) -N (1) -C (3) -C (4)    | -1.5 (6)   |
| C (2) -N (1) -C (3) -C (4)     | -173.4 (4) |
| O (3) -C (3) -C (4) -C (9)     | -178.2 (6) |
| N (1) -C (3) -C (4) -C (9)     | 2.3 (6)    |
| O (3) -C (3) -C (4) -C (5)     | -0.4 (10)  |
| N (1) -C (3) -C (4) -C (5)     | -179.9 (6) |
| C (9) -C (4) -C (5) -C (6)     | -3.5 (9)   |
| C (3) -C (4) -C (5) -C (6)     | 179.0 (6)  |
| C (4) -C (5) -C (6) -C (7)     | 5.1 (12)   |
| C (5) -C (6) -C (7) -C (8)     | -5.7 (16)  |
| C (6) -C (7) -C (8) -C (9)     | 4.0 (16)   |
| C (5) -C (4) -C (9) -C (8)     | 2.3 (10)   |
| C (3) -C (4) -C (9) -C (8)     | -179.8 (7) |
| C (5) -C (4) -C (9) -C (10)    | 179.8 (6)  |
| C (3) -C (4) -C (9) -C (10)    | -2.3 (7)   |
| C (7) -C (8) -C (9) -C (4)     | -2.4 (13)  |
| C (7) -C (8) -C (9) -C (10)    | -179.3 (8) |
| C (3) -N (1) -C (10) -O (4)    | -177.9 (6) |
| C (2) -N (1) -C (10) -O (4)    | -6.2 (10)  |
| C (3) -N (1) -C (10) -C (9)    | 0.1 (7)    |
| C (2) -N (1) -C (10) -C (9)    | 171.8 (5)  |
| C (4) -C (9) -C (10) -O (4)    | 179.3 (7)  |
| C (8) -C (9) -C (10) -O (4)    | -3.5 (13)  |
| C (4) -C (9) -C (10) -N (1)    | 1.4 (7)    |
| C (8) -C (9) -C (10) -N (1)    | 178.6 (8)  |
| N (1) -C (2) -C (11) -C (17)   | -52.3 (7)  |
| C (1) -C (2) -C (11) -C (17)   | -180.0 (5) |
| C (17) -C (12) -C (13) -C (14) | -4 (2)     |
| C (12) -C (13) -C (14) -C (15) | 5 (2)      |



|                                |             |
|--------------------------------|-------------|
| C (13) -C (14) -C (15) -C (16) | -5.0 (17)   |
| C (14) -C (15) -C (16) -C (17) | 4.3 (12)    |
| C (13) -C (12) -C (17) -C (16) | 2.7 (16)    |
| C (13) -C (12) -C (17) -C (11) | -178.0 (11) |
| C (15) -C (16) -C (17) -C (12) | -3.2 (12)   |
| C (15) -C (16) -C (17) -C (11) | 177.6 (7)   |
| C (2) -C (11) -C (17) -C (12)  | -48.6 (11)  |
| C (2) -C (11) -C (17) -C (16)  | 130.6 (6)   |
| Rh (2) -O (6) -C (18) -O (5)   | -9.6 (7)    |
| Rh (2) -O (6) -C (18) -C (19)  | 172.9 (3)   |
| Rh (1) -O (5) -C (18) -O (6)   | 4.1 (7)     |
| Rh (1) -O (5) -C (18) -C (19)  | -178.3 (3)  |
| C (20) -N (2) -C (19) -C (18)  | -124.5 (6)  |
| C (27) -N (2) -C (19) -C (18)  | 63.2 (6)    |
| C (20) -N (2) -C (19) -C (28)  | 108.4 (6)   |
| C (27) -N (2) -C (19) -C (28)  | -64.0 (6)   |
| O (6) -C (18) -C (19) -N (2)   | -143.8 (5)  |
| O (5) -C (18) -C (19) -N (2)   | 38.4 (6)    |
| O (6) -C (18) -C (19) -C (28)  | -18.0 (7)   |
| O (5) -C (18) -C (19) -C (28)  | 164.3 (5)   |
| C (19) -N (2) -C (20) -O (7)   | 5.0 (10)    |
| C (27) -N (2) -C (20) -O (7)   | 178.1 (7)   |
| C (19) -N (2) -C (20) -C (21)  | -173.2 (5)  |
| C (27) -N (2) -C (20) -C (21)  | -0.1 (6)    |
| O (7) -C (20) -C (21) -C (26)  | -177.5 (8)  |
| N (2) -C (20) -C (21) -C (26)  | 0.5 (8)     |
| O (7) -C (20) -C (21) -C (22)  | 6.5 (13)    |
| N (2) -C (20) -C (21) -C (22)  | -175.6 (7)  |
| C (26) -C (21) -C (22) -C (23) | 2.3 (15)    |
| C (20) -C (21) -C (22) -C (23) | 178.0 (10)  |
| C (21) -C (22) -C (23) -C (24) | -3 (2)      |
| C (22) -C (23) -C (24) -C (25) | 3 (3)       |
| C (23) -C (24) -C (25) -C (26) | -2 (3)      |
| C (24) -C (25) -C (26) -C (21) | 1.3 (16)    |
| C (24) -C (25) -C (26) -C (27) | -174.5 (12) |
| C (22) -C (21) -C (26) -C (25) | -1.4 (12)   |
| C (20) -C (21) -C (26) -C (25) | -177.6 (7)  |
| C (22) -C (21) -C (26) -C (27) | 175.6 (7)   |
| C (20) -C (21) -C (26) -C (27) | -0.7 (8)    |
| C (20) -N (2) -C (27) -O (8)   | 179.4 (6)   |
| C (19) -N (2) -C (27) -O (8)   | -7.3 (9)    |
| C (20) -N (2) -C (27) -C (26)  | -0.2 (7)    |
| C (19) -N (2) -C (27) -C (26)  | 173.1 (5)   |
| C (25) -C (26) -C (27) -O (8)  | -3.0 (15)   |
| C (21) -C (26) -C (27) -O (8)  | -179.0 (7)  |
| C (25) -C (26) -C (27) -N (2)  | 176.6 (10)  |
| C (21) -C (26) -C (27) -N (2)  | 0.5 (7)     |
| N (2) -C (19) -C (28) -C (34)  | -56.9 (7)   |
| C (18) -C (19) -C (28) -C (34) | 176.1 (5)   |
| C (34) -C (29) -C (30) -C (31) | 0.7 (11)    |
| C (29) -C (30) -C (31) -C (32) | -3.3 (13)   |
| C (30) -C (31) -C (32) -C (33) | 3.1 (13)    |
| C (31) -C (32) -C (33) -C (34) | -0.4 (11)   |
| C (32) -C (33) -C (34) -C (29) | -2.0 (10)   |
| C (32) -C (33) -C (34) -C (28) | -178.7 (6)  |
| C (30) -C (29) -C (34) -C (33) | 2.0 (10)    |
| C (30) -C (29) -C (34) -C (28) | 178.5 (6)   |
| C (19) -C (28) -C (34) -C (33) | 108.4 (7)   |
| C (19) -C (28) -C (34) -C (29) | -68.1 (7)   |
| Rh (1) -O (9) -C (35) -O (10)  | -8.4 (7)    |
| Rh (1) -O (9) -C (35) -C (36)  | 172.8 (3)   |

|                            |           |
|----------------------------|-----------|
| Rh(2) -O(10) -C(35) -O(9)  | 3.6(7)    |
| Rh(2) -O(10) -C(35) -C(36) | -177.6(4) |
| C(44) -N(3) -C(36) -C(45)  | -61.5(7)  |
| C(37) -N(3) -C(36) -C(45)  | 105.2(7)  |
| C(44) -N(3) -C(36) -C(35)  | 67.1(7)   |
| C(37) -N(3) -C(36) -C(35)  | -126.2(6) |
| O(9) -C(35) -C(36) -N(3)   | -159.3(5) |
| O(10) -C(35) -C(36) -N(3)  | 21.8(7)   |
| O(9) -C(35) -C(36) -C(45)  | -31.4(8)  |
| O(10) -C(35) -C(36) -C(45) | 149.7(6)  |
| C(44) -N(3) -C(37) -O(11)  | 174.6(6)  |
| C(36) -N(3) -C(37) -O(11)  | 6.2(9)    |
| C(44) -N(3) -C(37) -C(38)  | -4.1(6)   |
| C(36) -N(3) -C(37) -C(38)  | -172.4(5) |
| O(11) -C(37) -C(38) -C(43) | -176.3(7) |
| N(3) -C(37) -C(38) -C(43)  | 2.2(6)    |
| O(11) -C(37) -C(38) -C(39) | 7.0(11)   |
| N(3) -C(37) -C(38) -C(39)  | -174.4(6) |
| C(43) -C(38) -C(39) -C(40) | 0.4(9)    |
| C(37) -C(38) -C(39) -C(40) | 176.7(6)  |
| C(38) -C(39) -C(40) -C(41) | 1.6(10)   |
| C(39) -C(40) -C(41) -C(42) | -4.3(12)  |
| C(40) -C(41) -C(42) -C(43) | 4.7(11)   |
| C(39) -C(38) -C(43) -C(42) | 0.3(9)    |
| C(37) -C(38) -C(43) -C(42) | -176.7(6) |
| C(39) -C(38) -C(43) -C(44) | 177.2(5)  |
| C(37) -C(38) -C(43) -C(44) | 0.2(6)    |
| C(41) -C(42) -C(43) -C(38) | -2.7(9)   |
| C(41) -C(42) -C(43) -C(44) | -178.8(6) |
| C(37) -N(3) -C(44) -O(12)  | -177.6(6) |
| C(36) -N(3) -C(44) -O(12)  | -9.6(9)   |
| C(37) -N(3) -C(44) -C(43)  | 4.2(6)    |
| C(36) -N(3) -C(44) -C(43)  | 172.2(5)  |
| C(38) -C(43) -C(44) -O(12) | 179.3(6)  |
| C(42) -C(43) -C(44) -O(12) | -4.2(11)  |
| C(38) -C(43) -C(44) -N(3)  | -2.7(6)   |
| C(42) -C(43) -C(44) -N(3)  | 173.9(6)  |
| N(3) -C(36) -C(45) -C(51)  | -47.5(9)  |
| C(35) -C(36) -C(45) -C(51) | -175.6(6) |
| C(51) -C(46) -C(47) -C(48) | -2(2)     |
| C(46) -C(47) -C(48) -C(49) | 1(2)      |
| C(47) -C(48) -C(49) -C(50) | 1.5(19)   |
| C(48) -C(49) -C(50) -C(51) | -3.7(18)  |
| C(49) -C(50) -C(51) -C(46) | 3.3(15)   |
| C(49) -C(50) -C(51) -C(45) | -175.1(8) |
| C(47) -C(46) -C(51) -C(50) | -0.8(17)  |
| C(47) -C(46) -C(51) -C(45) | 177.6(10) |
| C(36) -C(45) -C(51) -C(50) | 93.9(10)  |
| C(36) -C(45) -C(51) -C(46) | -84.5(10) |
| Rh(1) -O(13) -C(52) -O(14) | 4.4(7)    |
| Rh(1) -O(13) -C(52) -C(53) | -169.8(3) |
| Rh(2) -O(14) -C(52) -O(13) | -10.5(7)  |
| Rh(2) -O(14) -C(52) -C(53) | 163.8(3)  |
| C(61) -N(4) -C(53) -C(52)  | 62.7(6)   |
| C(54) -N(4) -C(53) -C(52)  | -112.2(5) |
| C(61) -N(4) -C(53) -C(62)  | -64.1(6)  |
| C(54) -N(4) -C(53) -C(62)  | 121.0(5)  |
| O(13) -C(52) -C(53) -N(4)  | -136.1(4) |
| O(14) -C(52) -C(53) -N(4)  | 49.0(6)   |
| O(13) -C(52) -C(53) -C(62) | -9.6(7)   |
| O(14) -C(52) -C(53) -C(62) | 175.5(5)  |

|                         |           |
|-------------------------|-----------|
| C(61)-N(4)-C(54)-O(15)  | -176.3(5) |
| C(53)-N(4)-C(54)-O(15)  | -0.9(8)   |
| C(61)-N(4)-C(54)-C(55)  | 4.8(6)    |
| C(53)-N(4)-C(54)-C(55)  | -179.8(4) |
| O(15)-C(54)-C(55)-C(56) | -1.7(10)  |
| N(4)-C(54)-C(55)-C(56)  | 177.1(5)  |
| O(15)-C(54)-C(55)-C(60) | 178.9(6)  |
| N(4)-C(54)-C(55)-C(60)  | -2.3(6)   |
| C(60)-C(55)-C(56)-C(57) | 0.8(8)    |
| C(54)-C(55)-C(56)-C(57) | -178.5(5) |
| C(55)-C(56)-C(57)-C(58) | -1.7(9)   |
| C(56)-C(57)-C(58)-C(59) | 0.0(10)   |
| C(57)-C(58)-C(59)-C(60) | 2.6(10)   |
| C(58)-C(59)-C(60)-C(55) | -3.5(10)  |
| C(58)-C(59)-C(60)-C(61) | 179.0(6)  |
| C(56)-C(55)-C(60)-C(59) | 1.9(9)    |
| C(54)-C(55)-C(60)-C(59) | -178.6(6) |
| C(56)-C(55)-C(60)-C(61) | 179.8(5)  |
| C(54)-C(55)-C(60)-C(61) | -0.7(6)   |
| C(54)-N(4)-C(61)-O(16)  | 176.9(6)  |
| C(53)-N(4)-C(61)-O(16)  | 1.6(9)    |
| C(54)-N(4)-C(61)-C(60)  | -5.2(6)   |
| C(53)-N(4)-C(61)-C(60)  | 179.5(5)  |
| C(59)-C(60)-C(61)-O(16) | -1.1(12)  |
| C(55)-C(60)-C(61)-O(16) | -178.8(7) |
| C(59)-C(60)-C(61)-N(4)  | -178.8(7) |
| C(55)-C(60)-C(61)-N(4)  | 3.5(6)    |
| N(4)-C(53)-C(62)-C(68)  | -69.1(6)  |
| C(52)-C(53)-C(62)-C(68) | 165.1(5)  |
| C(68)-C(63)-C(64)-C(65) | 0.8(13)   |
| C(63)-C(64)-C(65)-C(66) | -2.3(13)  |
| C(64)-C(65)-C(66)-C(67) | 2.9(13)   |
| C(65)-C(66)-C(67)-C(68) | -2.1(14)  |
| C(64)-C(63)-C(68)-C(67) | 0.0(11)   |
| C(64)-C(63)-C(68)-C(62) | 179.3(7)  |
| C(66)-C(67)-C(68)-C(63) | 0.7(12)   |
| C(66)-C(67)-C(68)-C(62) | -178.6(7) |
| C(53)-C(62)-C(68)-C(63) | 90.7(8)   |
| C(53)-C(62)-C(68)-C(67) | -90.0(7)  |
| Rh(1)-N(5)-C(69)-C(70)  | 6(18)     |
| Rh(2)-N(6)-C(71)-C(72)  | 135(12)   |

---

Symmetry transformations used to generate equivalent atoms:

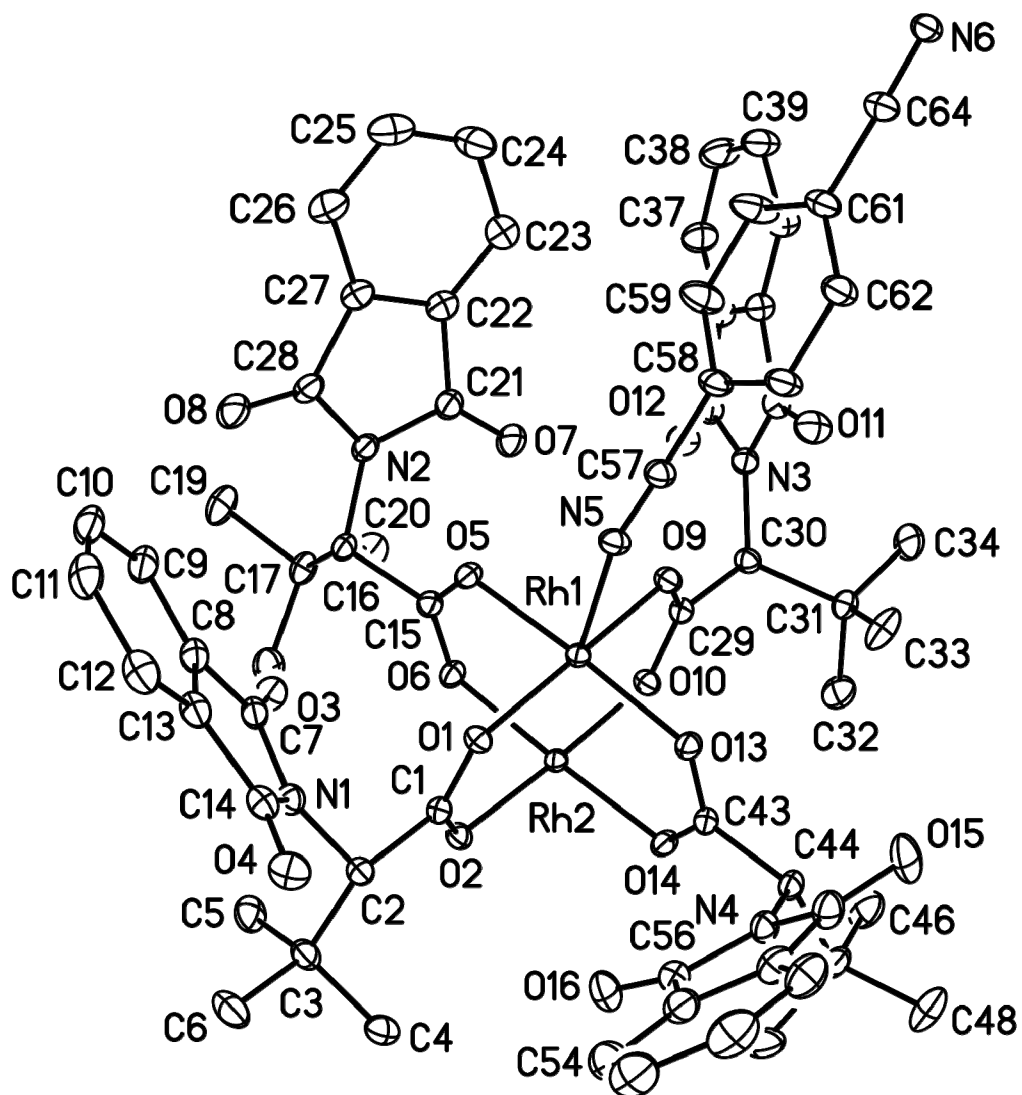

Figure 4. Molecular diagram of 5 monomer with ellipsoids at 30% probability. Three cocrystallized toluene solvent molecules and H-atoms deleted for clarity.

Table 1. Crystal data and structure refinement for joef086.

|                                   |                                                                                                               |
|-----------------------------------|---------------------------------------------------------------------------------------------------------------|
| Identification code               | joef086                                                                                                       |
| Empirical formula                 | C85 H84 N6 O16 Rh2                                                                                            |
| Formula weight                    | 1651.40                                                                                                       |
| Temperature                       | 170(2) K                                                                                                      |
| Wavelength                        | 0.71073 Å                                                                                                     |
| Crystal system, space group       | Orthorhombic, P2(1)2(1)2(1)                                                                                   |
| Unit cell dimensions              | a = 13.412(3) Å    alpha = 90 deg.<br>b = 21.783(5) Å    beta = 90 deg.<br>c = 27.323(6) Å    gamma = 90 deg. |
| Volume                            | 7982(3) Å <sup>3</sup>                                                                                        |
| Z, Calculated density             | 4, 1.374 Mg/m <sup>3</sup>                                                                                    |
| Absorption coefficient            | 0.483 mm <sup>-1</sup>                                                                                        |
| F(000)                            | 3416                                                                                                          |
| Crystal size                      | 0.23 x 0.21 x 0.17 mm                                                                                         |
| Theta range for data collection   | 1.49 to 28.31 deg.                                                                                            |
| Limiting indices                  | -17<=h<=17, -28<=k<=28, -36<=l<=36                                                                            |
| Reflections collected / unique    | 94308 / 19746 [R(int) = 0.0469]                                                                               |
| Completeness to theta = 25.00     | 99.9 %                                                                                                        |
| Absorption correction             | Semi-empirical from equivalents                                                                               |
| Max. and min. transmission        | 0.9206 and 0.8986                                                                                             |
| Refinement method                 | Full-matrix least-squares on F <sup>2</sup>                                                                   |
| Data / restraints / parameters    | 19746 / 0 / 997                                                                                               |
| Goodness-of-fit on F <sup>2</sup> | 1.028                                                                                                         |
| Final R indices [I>2sigma(I)]     | R1 = 0.0297, wR2 = 0.0748                                                                                     |
| R indices (all data)              | R1 = 0.0317, wR2 = 0.0772                                                                                     |
| Absolute structure parameter      | -0.043(11)                                                                                                    |
| Largest diff. peak and hole       | 0.917 and -0.348 e.Å <sup>-3</sup>                                                                            |

Table 2. Atomic coordinates ( $\times 10^4$ ) and equivalent isotropic displacement parameters ( $\text{\AA}^2 \times 10^3$ ) for joef086. U(eq) is defined as one third of the trace of the orthogonalized Uij tensor.

|       | x        | y        | z        | U(eq) |
|-------|----------|----------|----------|-------|
| Rh(1) | 6607(1)  | 402(1)   | 248(1)   | 18(1) |
| Rh(2) | 6557(1)  | -154(1)  | 1004(1)  | 18(1) |
| N(1)  | 4447(1)  | 1823(1)  | 963(1)   | 25(1) |
| N(2)  | 3679(1)  | -547(1)  | -258(1)  | 27(1) |
| N(3)  | 7530(1)  | -1499(1) | -531(1)  | 25(1) |
| N(4)  | 9244(1)  | 1523(1)  | 993(1)   | 28(1) |
| N(5)  | 6759(1)  | 826(1)   | -490(1)  | 26(1) |
| N(6)  | 8400(2)  | 620(1)   | -3266(1) | 25(1) |
| O(1)  | 5963(1)  | 1122(1)  | 611(1)   | 22(1) |
| O(2)  | 5892(1)  | 585(1)   | 1318(1)  | 24(1) |
| O(3)  | 3719(1)  | 891(1)   | 766(1)   | 32(1) |
| O(4)  | 4896(2)  | 2848(1)  | 951(1)   | 38(1) |
| O(5)  | 5232(1)  | 84(1)    | 90(1)    | 24(1) |
| O(6)  | 5184(1)  | -458(1)  | 796(1)   | 25(1) |
| O(7)  | 5040(1)  | -1198(1) | -356(1)  | 40(1) |
| O(8)  | 2454(1)  | 172(1)   | -432(1)  | 42(1) |
| O(9)  | 7199(1)  | -366(1)  | -65(1)   | 24(1) |
| O(10) | 7185(1)  | -875(1)  | 655(1)   | 24(1) |
| O(11) | 8221(1)  | -697(1)  | -988(1)  | 39(1) |
| O(12) | 6680(1)  | -2402(1) | -344(1)  | 36(1) |
| O(13) | 7977(1)  | 724(1)   | 451(1)   | 24(1) |
| O(14) | 7937(1)  | 200(1)   | 1161(1)  | 25(1) |
| O(15) | 10379(2) | 1737(1)  | 378(1)   | 49(1) |
| O(16) | 7907(2)  | 1632(1)  | 1521(1)  | 41(1) |
| C(1)  | 5733(2)  | 1050(1)  | 1056(1)  | 22(1) |
| C(2)  | 5230(2)  | 1609(1)  | 1297(1)  | 24(1) |
| C(3)  | 4867(2)  | 1551(1)  | 1835(1)  | 30(1) |
| C(4)  | 5776(2)  | 1420(1)  | 2162(1)  | 39(1) |
| C(5)  | 4066(2)  | 1057(1)  | 1900(1)  | 39(1) |
| C(6)  | 4433(2)  | 2175(1)  | 1991(1)  | 43(1) |
| C(7)  | 3779(2)  | 1443(1)  | 709(1)   | 27(1) |
| C(8)  | 3209(2)  | 1852(1)  | 380(1)   | 28(1) |
| C(9)  | 2468(2)  | 1714(1)  | 47(1)    | 34(1) |
| C(10) | 2071(2)  | 2209(1)  | -212(1)  | 39(1) |
| C(11) | 2395(2)  | 2802(1)  | -143(1)  | 42(1) |
| C(12) | 3149(2)  | 2937(1)  | 187(1)   | 38(1) |
| C(13) | 3547(2)  | 2449(1)  | 449(1)   | 30(1) |
| C(14) | 4373(2)  | 2436(1)  | 808(1)   | 29(1) |
| C(15) | 4817(2)  | -264(1)  | 398(1)   | 23(1) |
| C(16) | 3728(2)  | -426(1)  | 273(1)   | 26(1) |
| C(17) | 3187(2)  | -912(1)  | 590(1)   | 32(1) |
| C(18) | 3122(2)  | -676(2)  | 1116(1)  | 43(1) |
| C(19) | 2118(2)  | -967(2)  | 389(1)   | 46(1) |
| C(20) | 3687(2)  | -1544(1) | 564(1)   | 43(1) |
| C(21) | 4361(2)  | -900(1)  | -526(1)  | 31(1) |
| C(22) | 4068(2)  | -827(1)  | -1050(1) | 34(1) |
| C(23) | 4441(2)  | -1109(2) | -1462(1) | 47(1) |
| C(24) | 3984(3)  | -955(2)  | -1909(1) | 54(1) |

|        |           |           |           |         |
|--------|-----------|-----------|-----------|---------|
| C (25) | 3206 (3)  | -548 (2)  | -1931 (1) | 52 (1)  |
| C (26) | 2829 (2)  | -264 (1)  | -1512 (1) | 43 (1)  |
| C (27) | 3278 (2)  | -419 (1)  | -1072 (1) | 33 (1)  |
| C (28) | 3050 (2)  | -209 (1)  | -565 (1)  | 31 (1)  |
| C (29) | 7357 (2)  | -829 (1)  | 200 (1)   | 23 (1)  |
| C (30) | 7848 (2)  | -1398 (1) | -23 (1)   | 23 (1)  |
| C (31) | 8999 (2)  | -1409 (1) | 68 (1)    | 29 (1)  |
| C (32) | 9180 (2)  | -1586 (2) | 604 (1)   | 46 (1)  |
| C (33) | 9489 (2)  | -782 (1)  | -24 (1)   | 49 (1)  |
| C (34) | 9468 (2)  | -1898 (2) | -253 (1)  | 52 (1)  |
| C (35) | 6953 (2)  | -2026 (1) | -637 (1)  | 29 (1)  |
| C (36) | 6788 (2)  | -2017 (1) | -1178 (1) | 33 (1)  |
| C (37) | 6289 (2)  | -2430 (1) | -1477 (1) | 45 (1)  |
| C (38) | 6297 (3)  | -2300 (2) | -1979 (1) | 53 (1)  |
| C (39) | 6782 (2)  | -1795 (2) | -2169 (1) | 50 (1)  |
| C (40) | 7277 (2)  | -1385 (1) | -1862 (1) | 41 (1)  |
| C (41) | 7262 (2)  | -1509 (1) | -1367 (1) | 31 (1)  |
| C (42) | 7739 (2)  | -1162 (1) | -954 (1)  | 28 (1)  |
| C (43) | 8329 (2)  | 564 (1)   | 861 (1)   | 23 (1)  |
| C (44) | 9356 (2)  | 854 (1)   | 967 (1)   | 27 (1)  |
| C (45) | 9991 (2)  | 584 (1)   | 1391 (1)  | 34 (1)  |
| C (46) | 10140 (2) | -104 (1)  | 1294 (1)  | 44 (1)  |
| C (47) | 9516 (2)  | 681 (2)   | 1895 (1)  | 46 (1)  |
| C (48) | 11019 (2) | 895 (2)   | 1382 (1)  | 53 (1)  |
| C (49) | 9803 (2)  | 1913 (1)  | 683 (1)   | 35 (1)  |
| C (50) | 9490 (2)  | 2548 (1)  | 808 (1)   | 36 (1)  |
| C (51) | 9803 (2)  | 3107 (1)  | 618 (1)   | 45 (1)  |
| C (52) | 9331 (3)  | 3632 (1)  | 794 (1)   | 52 (1)  |
| C (53) | 8580 (3)  | 3596 (1)  | 1137 (1)  | 52 (1)  |
| C (54) | 8268 (2)  | 3033 (1)  | 1328 (1)  | 44 (1)  |
| C (55) | 8740 (2)  | 2513 (1)  | 1153 (1)  | 35 (1)  |
| C (56) | 8544 (2)  | 1854 (1)  | 1262 (1)  | 31 (1)  |
| C (57) | 7028 (2)  | 820 (1)   | -887 (1)  | 27 (1)  |
| C (58) | 7333 (2)  | 801 (1)   | -1394 (1) | 29 (1)  |
| C (59) | 6925 (2)  | 351 (1)   | -1694 (1) | 43 (1)  |
| C (60) | 7206 (2)  | 324 (1)   | -2181 (1) | 44 (1)  |
| C (61) | 7892 (2)  | 744 (1)   | -2361 (1) | 30 (1)  |
| C (62) | 8305 (2)  | 1193 (1)  | -2062 (1) | 32 (1)  |
| C (63) | 8020 (2)  | 1218 (1)  | -1572 (1) | 32 (1)  |
| C (64) | 8191 (2)  | 692 (1)   | -2867 (1) | 29 (1)  |
| C (65) | 4751 (4)  | 1866 (2)  | 3442 (1)  | 68 (1)  |
| C (66) | 3962 (5)  | 1610 (2)  | 3676 (2)  | 86 (1)  |
| C (67) | 3260 (5)  | 1974 (4)  | 3902 (2)  | 115 (2) |
| C (68) | 3376 (6)  | 2582 (5)  | 3903 (3)  | 143 (4) |
| C (69) | 4134 (5)  | 2842 (2)  | 3678 (2)  | 96 (2)  |
| C (70) | 4860 (4)  | 2495 (2)  | 3432 (1)  | 75 (1)  |
| C (71) | 5714 (5)  | 2758 (3)  | 3182 (2)  | 124 (3) |
| C (72) | 5021 (2)  | 4904 (2)  | 1614 (1)  | 55 (1)  |
| C (73) | 5254 (3)  | 4931 (2)  | 2103 (2)  | 63 (1)  |
| C (74) | 5807 (3)  | 4484 (2)  | 2321 (1)  | 64 (1)  |
| C (75) | 6129 (3)  | 3990 (2)  | 2045 (1)  | 54 (1)  |
| C (76) | 5901 (2)  | 3956 (1)  | 1553 (1)  | 44 (1)  |
| C (77) | 5341 (2)  | 4413 (1)  | 1329 (1)  | 42 (1)  |
| C (78) | 5092 (3)  | 4381 (2)  | 790 (1)   | 53 (1)  |
| C (79) | 10679 (3) | 3092 (2)  | 2082 (2)  | 65 (1)  |
| C (80) | 11359 (5) | 2608 (3)  | 2156 (3)  | 113 (2) |
| C (81) | 11776 (4) | 2551 (3)  | 2658 (3)  | 101 (2) |

|        |           |          |          |         |
|--------|-----------|----------|----------|---------|
| C (82) | 11462 (4) | 2973 (3) | 2987 (2) | 94 (2)  |
| C (83) | 10801 (5) | 3418 (3) | 2902 (2) | 101 (2) |
| C (84) | 10422 (4) | 3475 (2) | 2448 (2) | 78 (1)  |
| C (85) | 9674 (5)  | 3986 (3) | 2353 (3) | 119 (2) |

---



Table 3. Bond lengths [Å] and angles [deg] for joef086.

---

|              |             |
|--------------|-------------|
| Rh(1)-O(5)   | 2.0173 (15) |
| Rh(1)-O(9)   | 2.0393 (15) |
| Rh(1)-O(13)  | 2.0431 (15) |
| Rh(1)-O(1)   | 2.0477 (15) |
| Rh(1)-N(5)   | 2.2292 (18) |
| Rh(1)-Rh(2)  | 2.3949 (5)  |
| Rh(2)-O(10)  | 2.0208 (15) |
| Rh(2)-O(2)   | 2.0310 (15) |
| Rh(2)-O(6)   | 2.0383 (15) |
| Rh(2)-O(14)  | 2.0497 (15) |
| Rh(2)-N(6)#1 | 2.2380 (17) |
| N(1)-C(7)    | 1.404 (3)   |
| N(1)-C(14)   | 1.405 (3)   |
| N(1)-C(2)    | 1.468 (3)   |
| N(2)-C(28)   | 1.400 (3)   |
| N(2)-C(21)   | 1.402 (3)   |
| N(2)-C(16)   | 1.474 (3)   |
| N(3)-C(42)   | 1.396 (3)   |
| N(3)-C(35)   | 1.415 (3)   |
| N(3)-C(30)   | 1.470 (3)   |
| N(4)-C(56)   | 1.394 (3)   |
| N(4)-C(49)   | 1.414 (3)   |
| N(4)-C(44)   | 1.467 (3)   |
| N(5)-C(57)   | 1.143 (3)   |
| N(6)-C(64)   | 1.136 (3)   |
| N(6)-Rh(2)#2 | 2.2380 (17) |
| O(1)-C(1)    | 1.264 (3)   |
| O(2)-C(1)    | 1.259 (3)   |
| O(3)-C(7)    | 1.215 (3)   |
| O(4)-C(14)   | 1.205 (3)   |
| O(5)-C(15)   | 1.263 (3)   |
| O(6)-C(15)   | 1.265 (2)   |
| O(7)-C(21)   | 1.210 (3)   |
| O(8)-C(28)   | 1.209 (3)   |
| O(9)-C(29)   | 1.259 (3)   |
| O(10)-C(29)  | 1.269 (3)   |
| O(11)-C(42)  | 1.205 (3)   |
| O(12)-C(35)  | 1.202 (3)   |
| O(13)-C(43)  | 1.265 (2)   |
| O(14)-C(43)  | 1.256 (2)   |
| O(15)-C(49)  | 1.198 (3)   |
| O(16)-C(56)  | 1.211 (3)   |
| C(1)-C(2)    | 1.539 (3)   |
| C(2)-C(3)    | 1.554 (3)   |
| C(3)-C(5)    | 1.530 (4)   |
| C(3)-C(4)    | 1.537 (3)   |
| C(3)-C(6)    | 1.538 (3)   |
| C(7)-C(8)    | 1.478 (3)   |
| C(8)-C(9)    | 1.381 (3)   |
| C(8)-C(13)   | 1.390 (3)   |
| C(9)-C(10)   | 1.396 (4)   |
| C(10)-C(11)  | 1.376 (4)   |
| <br>         |             |
| C(11)-C(12)  | 1.386 (4)   |
| C(12)-C(13)  | 1.389 (3)   |
| C(13)-C(14)  | 1.480 (3)   |

|                |            |
|----------------|------------|
| C (15) -C (16) | 1.540 (3)  |
| C (16) -C (17) | 1.549 (3)  |
| C (17) -C (18) | 1.529 (4)  |
| C (17) -C (20) | 1.532 (4)  |
| C (17) -C (19) | 1.539 (3)  |
| C (21) -C (22) | 1.493 (3)  |
| C (22) -C (23) | 1.377 (4)  |
| C (22) -C (27) | 1.385 (3)  |
| C (23) -C (24) | 1.407 (4)  |
| C (24) -C (25) | 1.371 (5)  |
| C (25) -C (26) | 1.396 (4)  |
| C (26) -C (27) | 1.387 (3)  |
| C (27) -C (28) | 1.488 (3)  |
| C (29) -C (30) | 1.530 (3)  |
| C (30) -C (31) | 1.563 (3)  |
| C (31) -C (34) | 1.515 (4)  |
| C (31) -C (32) | 1.535 (4)  |
| C (31) -C (33) | 1.536 (4)  |
| C (35) -C (36) | 1.495 (3)  |
| C (36) -C (41) | 1.378 (4)  |
| C (36) -C (37) | 1.387 (4)  |
| C (37) -C (38) | 1.401 (4)  |
| C (38) -C (39) | 1.378 (5)  |
| C (39) -C (40) | 1.393 (4)  |
| C (40) -C (41) | 1.382 (3)  |
| C (41) -C (42) | 1.500 (3)  |
| C (43) -C (44) | 1.543 (3)  |
| C (44) -C (45) | 1.554 (3)  |
| C (45) -C (47) | 1.530 (4)  |
| C (45) -C (46) | 1.534 (4)  |
| C (45) -C (48) | 1.538 (4)  |
| C (49) -C (50) | 1.486 (4)  |
| C (50) -C (55) | 1.382 (4)  |
| C (50) -C (51) | 1.388 (4)  |
| C (51) -C (52) | 1.393 (5)  |
| C (52) -C (53) | 1.377 (5)  |
| C (53) -C (54) | 1.398 (4)  |
| C (54) -C (55) | 1.383 (4)  |
| C (55) -C (56) | 1.490 (3)  |
| C (57) -C (58) | 1.446 (3)  |
| C (58) -C (63) | 1.383 (3)  |
| C (58) -C (59) | 1.388 (4)  |
| C (59) -C (60) | 1.384 (3)  |
| C (60) -C (61) | 1.386 (4)  |
| C (61) -C (62) | 1.390 (3)  |
| C (61) -C (64) | 1.446 (3)  |
| C (62) -C (63) | 1.392 (3)  |
| C (65) -C (66) | 1.358 (7)  |
| C (65) -C (70) | 1.377 (6)  |
| C (66) -C (67) | 1.375 (8)  |
| C (67) -C (68) | 1.335 (10) |
| C (68) -C (69) | 1.317 (10) |
| C (69) -C (70) | 1.403 (8)  |
| C (70) -C (71) | 1.452 (7)  |
| C (72) -C (73) | 1.373 (5)  |
| C (72) -C (77) | 1.390 (4)  |
| C (73) -C (74) | 1.362 (6)  |
| C (74) -C (75) | 1.384 (5)  |
| C (75) -C (76) | 1.380 (5)  |
| C (76) -C (77) | 1.390 (4)  |
| C (77) -C (78) | 1.512 (4)  |

|                            |             |
|----------------------------|-------------|
| C (79) - C (84)            | 1.347 (6)   |
| C (79) - C (80)            | 1.408 (8)   |
| C (80) - C (81)            | 1.486 (9)   |
| C (81) - C (82)            | 1.354 (8)   |
| C (82) - C (83)            | 1.334 (8)   |
| C (83) - C (84)            | 1.348 (7)   |
| C (84) - C (85)            | 1.521 (8)   |
| O (5) - Rh (1) - O (9)     | 89.10 (6)   |
| O (5) - Rh (1) - O (13)    | 176.64 (6)  |
| O (9) - Rh (1) - O (13)    | 92.63 (6)   |
| O (5) - Rh (1) - O (1)     | 88.90 (6)   |
| O (9) - Rh (1) - O (1)     | 174.83 (6)  |
| O (13) - Rh (1) - O (1)    | 89.14 (6)   |
| O (5) - Rh (1) - N (5)     | 91.80 (6)   |
| O (9) - Rh (1) - N (5)     | 85.69 (6)   |
| O (13) - Rh (1) - N (5)    | 91.20 (6)   |
| O (1) - Rh (1) - N (5)     | 99.14 (6)   |
| O (5) - Rh (1) - Rh (2)    | 89.17 (4)   |
| O (9) - Rh (1) - Rh (2)    | 87.59 (4)   |
| O (13) - Rh (1) - Rh (2)   | 88.03 (4)   |
| O (1) - Rh (1) - Rh (2)    | 87.61 (4)   |
| N (5) - Rh (1) - Rh (2)    | 173.19 (5)  |
| O (10) - Rh (2) - O (2)    | 176.79 (6)  |
| O (10) - Rh (2) - O (6)    | 89.58 (6)   |
| O (2) - Rh (2) - O (6)     | 88.78 (6)   |
| O (10) - Rh (2) - O (14)   | 90.82 (7)   |
| O (2) - Rh (2) - O (14)    | 90.58 (6)   |
| O (6) - Rh (2) - O (14)    | 175.01 (6)  |
| O (10) - Rh (2) - N (6) #1 | 93.30 (6)   |
| O (2) - Rh (2) - N (6) #1  | 89.65 (6)   |
| O (6) - Rh (2) - N (6) #1  | 97.17 (7)   |
| O (14) - Rh (2) - N (6) #1 | 87.77 (7)   |
| O (10) - Rh (2) - Rh (1)   | 88.55 (4)   |
| O (2) - Rh (2) - Rh (1)    | 88.61 (4)   |
| O (6) - Rh (2) - Rh (1)    | 87.07 (4)   |
| O (14) - Rh (2) - Rh (1)   | 87.97 (4)   |
| N (6) #1 - Rh (2) - Rh (1) | 175.39 (5)  |
| C (7) - N (1) - C (14)     | 111.49 (19) |
| C (7) - N (1) - C (2)      | 125.27 (18) |
| C (14) - N (1) - C (2)     | 122.68 (19) |
| C (28) - N (2) - C (21)    | 111.55 (19) |
| C (28) - N (2) - C (16)    | 121.59 (18) |
| C (21) - N (2) - C (16)    | 125.63 (18) |
| C (42) - N (3) - C (35)    | 111.63 (19) |
| C (42) - N (3) - C (30)    | 130.12 (18) |
| C (35) - N (3) - C (30)    | 118.19 (18) |
| C (56) - N (4) - C (49)    | 111.29 (19) |
| C (56) - N (4) - C (44)    | 127.41 (19) |
| C (49) - N (4) - C (44)    | 120.9 (2)   |
| C (57) - N (5) - Rh (1)    | 151.96 (18) |
| C (64) - N (6) - Rh (2) #2 | 157.51 (19) |
| C (1) - O (1) - Rh (1)     | 118.26 (13) |
| C (1) - O (2) - Rh (2)     | 118.20 (13) |
| C (15) - O (5) - Rh (1)    | 117.83 (13) |
| C (15) - O (6) - Rh (2)    | 118.91 (14) |
| C (29) - O (9) - Rh (1)    | 118.77 (13) |
| C (29) - O (10) - Rh (2)   | 118.46 (14) |
| C (43) - O (13) - Rh (1)   | 118.69 (13) |
| C (43) - O (14) - Rh (2)   | 118.61 (13) |
| O (2) - C (1) - O (1)      | 127.25 (19) |

|                       |            |
|-----------------------|------------|
| O(2) - C(1) - C(2)    | 117.89(18) |
| O(1) - C(1) - C(2)    | 114.84(18) |
| N(1) - C(2) - C(1)    | 107.35(16) |
| N(1) - C(2) - C(3)    | 113.03(18) |
| C(1) - C(2) - C(3)    | 118.50(18) |
| C(5) - C(3) - C(4)    | 111.0(2)   |
| C(5) - C(3) - C(6)    | 108.8(2)   |
| C(4) - C(3) - C(6)    | 107.7(2)   |
| C(5) - C(3) - C(2)    | 112.76(19) |
| C(4) - C(3) - C(2)    | 108.44(19) |
| C(6) - C(3) - C(2)    | 107.97(19) |
| O(3) - C(7) - N(1)    | 124.2(2)   |
| O(3) - C(7) - C(8)    | 129.8(2)   |
| N(1) - C(7) - C(8)    | 105.97(19) |
| C(9) - C(8) - C(13)   | 121.8(2)   |
| C(9) - C(8) - C(7)    | 129.9(2)   |
| C(13) - C(8) - C(7)   | 108.3(2)   |
| C(8) - C(9) - C(10)   | 116.2(2)   |
| C(11) - C(10) - C(9)  | 122.3(3)   |
| C(10) - C(11) - C(12) | 121.3(2)   |
| C(11) - C(12) - C(13) | 117.0(3)   |
| C(12) - C(13) - C(8)  | 121.4(2)   |
| C(12) - C(13) - C(14) | 130.1(2)   |
| C(8) - C(13) - C(14)  | 108.41(19) |
| O(4) - C(14) - N(1)   | 124.7(2)   |
| O(4) - C(14) - C(13)  | 129.6(2)   |
| N(1) - C(14) - C(13)  | 105.71(19) |
| O(5) - C(15) - O(6)   | 126.9(2)   |
| O(5) - C(15) - C(16)  | 114.00(18) |
| O(6) - C(15) - C(16)  | 118.97(19) |
| N(2) - C(16) - C(15)  | 107.57(17) |
| N(2) - C(16) - C(17)  | 113.99(18) |
| C(15) - C(16) - C(17) | 118.40(18) |
| C(18) - C(17) - C(20) | 111.7(2)   |
| C(18) - C(17) - C(19) | 107.9(2)   |
| C(20) - C(17) - C(19) | 108.8(2)   |
| C(18) - C(17) - C(16) | 108.8(2)   |
| C(20) - C(17) - C(16) | 112.6(2)   |
| C(19) - C(17) - C(16) | 106.9(2)   |
| O(7) - C(21) - N(2)   | 125.9(2)   |
| O(7) - C(21) - C(22)  | 128.4(2)   |
| N(2) - C(21) - C(22)  | 105.7(2)   |
| C(23) - C(22) - C(27) | 121.9(2)   |
| C(23) - C(22) - C(21) | 129.9(2)   |
| C(27) - C(22) - C(21) | 108.1(2)   |
| C(22) - C(23) - C(24) | 116.4(3)   |
| C(25) - C(24) - C(23) | 121.6(3)   |
| C(24) - C(25) - C(26) | 121.7(3)   |
| C(27) - C(26) - C(25) | 116.6(3)   |
| C(22) - C(27) - C(26) | 121.7(2)   |
| C(22) - C(27) - C(28) | 108.3(2)   |
| C(26) - C(27) - C(28) | 130.0(2)   |
| O(8) - C(28) - N(2)   | 125.3(2)   |
| O(8) - C(28) - C(27)  | 128.8(2)   |
| N(2) - C(28) - C(27)  | 105.9(2)   |
| O(9) - C(29) - O(10)  | 126.6(2)   |
| O(9) - C(29) - C(30)  | 119.50(18) |
| O(10) - C(29) - C(30) | 113.87(18) |
| N(3) - C(30) - C(29)  | 111.84(17) |
| N(3) - C(30) - C(31)  | 115.76(18) |
| C(29) - C(30) - C(31) | 112.01(19) |

|                   |            |
|-------------------|------------|
| C(34)-C(31)-C(32) | 108.0(2)   |
| C(34)-C(31)-C(33) | 110.7(2)   |
| C(32)-C(31)-C(33) | 108.1(2)   |
| C(34)-C(31)-C(30) | 109.3(2)   |
| C(32)-C(31)-C(30) | 108.2(2)   |
| C(33)-C(31)-C(30) | 112.5(2)   |
| O(12)-C(35)-N(3)  | 125.7(2)   |
| O(12)-C(35)-C(36) | 128.5(2)   |
| N(3)-C(35)-C(36)  | 105.8(2)   |
| C(41)-C(36)-C(37) | 121.6(2)   |
| C(41)-C(36)-C(35) | 108.2(2)   |
| C(37)-C(36)-C(35) | 130.2(3)   |
| C(36)-C(37)-C(38) | 116.2(3)   |
| C(39)-C(38)-C(37) | 122.2(3)   |
| C(38)-C(39)-C(40) | 120.8(3)   |
| C(41)-C(40)-C(39) | 117.2(3)   |
| C(36)-C(41)-C(40) | 122.0(2)   |
| C(36)-C(41)-C(42) | 108.7(2)   |
| C(40)-C(41)-C(42) | 129.2(2)   |
| O(11)-C(42)-N(3)  | 127.8(2)   |
| O(11)-C(42)-C(41) | 126.5(2)   |
| N(3)-C(42)-C(41)  | 105.73(19) |
| O(14)-C(43)-O(13) | 126.6(2)   |
| O(14)-C(43)-C(44) | 120.61(18) |
| O(13)-C(43)-C(44) | 112.74(18) |
| N(4)-C(44)-C(43)  | 108.93(17) |
| N(4)-C(44)-C(45)  | 113.35(19) |
| C(43)-C(44)-C(45) | 118.36(19) |
| C(47)-C(45)-C(46) | 110.2(2)   |
| C(47)-C(45)-C(48) | 109.2(2)   |
| C(46)-C(45)-C(48) | 108.0(2)   |
| C(47)-C(45)-C(44) | 113.0(2)   |
| C(46)-C(45)-C(44) | 108.1(2)   |
| C(48)-C(45)-C(44) | 108.2(2)   |
| O(15)-C(49)-N(4)  | 124.5(2)   |
| O(15)-C(49)-C(50) | 129.7(2)   |
| N(4)-C(49)-C(50)  | 105.8(2)   |
| C(55)-C(50)-C(51) | 121.5(3)   |
| C(55)-C(50)-C(49) | 108.2(2)   |
| C(51)-C(50)-C(49) | 130.2(3)   |
| C(50)-C(51)-C(52) | 117.1(3)   |
| C(53)-C(52)-C(51) | 121.3(3)   |
| C(52)-C(53)-C(54) | 121.6(3)   |
| C(55)-C(54)-C(53) | 116.9(3)   |
| C(50)-C(55)-C(54) | 121.6(3)   |
| C(50)-C(55)-C(56) | 108.5(2)   |
| C(54)-C(55)-C(56) | 129.8(3)   |
| O(16)-C(56)-N(4)  | 125.3(2)   |
| O(16)-C(56)-C(55) | 128.8(2)   |
| N(4)-C(56)-C(55)  | 105.9(2)   |
| N(5)-C(57)-C(58)  | 177.9(3)   |
| C(63)-C(58)-C(59) | 121.3(2)   |
| C(63)-C(58)-C(57) | 120.4(2)   |
| C(59)-C(58)-C(57) | 118.2(2)   |
| C(60)-C(59)-C(58) | 119.2(2)   |
| C(59)-C(60)-C(61) | 119.6(2)   |
| C(60)-C(61)-C(62) | 121.3(2)   |
| C(60)-C(61)-C(64) | 118.2(2)   |
| C(62)-C(61)-C(64) | 120.4(2)   |
| C(61)-C(62)-C(63) | 118.9(2)   |
| C(58)-C(63)-C(62) | 119.6(2)   |

|                       |          |
|-----------------------|----------|
| N(6) - C(64) - C(61)  | 176.0(3) |
| C(66) - C(65) - C(70) | 120.0(4) |
| C(65) - C(66) - C(67) | 120.6(5) |
| C(68) - C(67) - C(66) | 119.5(7) |
| C(69) - C(68) - C(67) | 121.0(6) |
| C(68) - C(69) - C(70) | 121.9(5) |
| C(65) - C(70) - C(69) | 116.9(5) |
| C(65) - C(70) - C(71) | 119.1(5) |
| C(69) - C(70) - C(71) | 124.0(6) |
| C(73) - C(72) - C(77) | 120.5(3) |
| C(74) - C(73) - C(72) | 121.3(3) |
| C(73) - C(74) - C(75) | 119.1(3) |
| C(76) - C(75) - C(74) | 120.3(3) |
| C(75) - C(76) - C(77) | 120.7(3) |
| C(72) - C(77) - C(76) | 118.1(3) |
| C(72) - C(77) - C(78) | 120.9(3) |
| C(76) - C(77) - C(78) | 121.1(3) |
| C(84) - C(79) - C(80) | 121.5(5) |
| C(79) - C(80) - C(81) | 116.1(6) |
| C(82) - C(81) - C(80) | 116.0(6) |
| C(83) - C(82) - C(81) | 125.9(6) |
| C(82) - C(83) - C(84) | 118.4(7) |
| C(79) - C(84) - C(83) | 122.1(6) |
| C(79) - C(84) - C(85) | 119.7(5) |
| C(83) - C(84) - C(85) | 118.2(6) |

---

Symmetry transformations used to generate equivalent atoms:  
#1  $-x+3/2, -y, z+1/2$       #2  $-x+3/2, -y, z-1/2$

Table 4. Anisotropic displacement parameters ( $\text{\AA}^2 \times 10^3$ ) for joef086.  
 The anisotropic displacement factor exponent takes the form:  
 $-2 \pi^2 [ h^2 a^{*2} U_{11} + \dots + 2 h k a^* b^* U_{12} ]$

|       | U11   | U22   | U33   | U23   | U13    | U12    |
|-------|-------|-------|-------|-------|--------|--------|
| Rh(1) | 18(1) | 21(1) | 16(1) | 1(1)  | 0(1)   | 0(1)   |
| Rh(2) | 18(1) | 22(1) | 16(1) | 2(1)  | -1(1)  | 0(1)   |
| N(1)  | 25(1) | 24(1) | 27(1) | 1(1)  | 0(1)   | 4(1)   |
| N(2)  | 23(1) | 28(1) | 31(1) | -4(1) | -7(1)  | 2(1)   |
| N(3)  | 25(1) | 24(1) | 25(1) | -2(1) | 0(1)   | 0(1)   |
| N(4)  | 23(1) | 28(1) | 33(1) | -1(1) | 2(1)   | -4(1)  |
| N(5)  | 30(1) | 29(1) | 19(1) | -1(1) | 1(1)   | -4(1)  |
| N(6)  | 28(1) | 29(1) | 20(1) | -2(1) | 1(1)   | 3(1)   |
| O(1)  | 24(1) | 22(1) | 20(1) | 0(1)  | 3(1)   | 1(1)   |
| O(2)  | 25(1) | 27(1) | 20(1) | 1(1)  | 2(1)   | 3(1)   |
| O(3)  | 32(1) | 25(1) | 40(1) | 1(1)  | -3(1)  | 0(1)   |
| O(4)  | 48(1) | 26(1) | 40(1) | -1(1) | 0(1)   | -1(1)  |
| O(5)  | 21(1) | 27(1) | 23(1) | 1(1)  | -4(1)  | -2(1)  |
| O(6)  | 20(1) | 29(1) | 26(1) | 3(1)  | -2(1)  | -3(1)  |
| O(7)  | 33(1) | 43(1) | 45(1) | -7(1) | -8(1)  | 14(1)  |
| O(8)  | 37(1) | 42(1) | 45(1) | -6(1) | -12(1) | 15(1)  |
| O(9)  | 27(1) | 25(1) | 21(1) | -1(1) | 1(1)   | 3(1)   |
| O(10) | 27(1) | 24(1) | 21(1) | 0(1)  | 1(1)   | 3(1)   |
| O(11) | 47(1) | 38(1) | 33(1) | 3(1)  | 3(1)   | -12(1) |
| O(12) | 40(1) | 30(1) | 38(1) | 1(1)  | 1(1)   | -8(1)  |
| O(13) | 20(1) | 29(1) | 22(1) | 2(1)  | 0(1)   | -3(1)  |
| O(14) | 20(1) | 30(1) | 24(1) | 1(1)  | -4(1)  | -4(1)  |
| O(15) | 36(1) | 47(1) | 63(1) | 0(1)  | 23(1)  | -5(1)  |
| O(16) | 37(1) | 43(1) | 44(1) | -1(1) | 14(1)  | 0(1)   |
| C(1)  | 18(1) | 25(1) | 23(1) | -1(1) | 1(1)   | -1(1)  |
| C(2)  | 24(1) | 25(1) | 23(1) | -2(1) | 1(1)   | 0(1)   |
| C(3)  | 32(1) | 35(1) | 24(1) | -3(1) | 5(1)   | 5(1)   |
| C(4)  | 41(2) | 50(2) | 25(1) | -5(1) | -2(1)  | 7(1)   |
| C(5)  | 34(1) | 51(2) | 32(1) | 8(1)  | 8(1)   | 2(1)   |
| C(6)  | 54(2) | 44(2) | 33(1) | -5(1) | 8(1)   | 17(1)  |
| C(7)  | 23(1) | 31(1) | 28(1) | 0(1)  | 4(1)   | 5(1)   |
| C(8)  | 25(1) | 30(1) | 30(1) | 4(1)  | 4(1)   | 5(1)   |
| C(9)  | 24(1) | 41(1) | 36(1) | 6(1)  | 1(1)   | 3(1)   |
| C(10) | 25(1) | 59(2) | 34(1) | 12(1) | 0(1)   | 9(1)   |
| C(11) | 39(1) | 47(2) | 41(1) | 18(1) | 5(1)   | 18(1)  |
| C(12) | 46(2) | 32(1) | 38(1) | 9(1)  | 9(1)   | 11(1)  |
| C(13) | 32(1) | 31(1) | 29(1) | 4(1)  | 6(1)   | 7(1)   |
| C(14) | 33(1) | 26(1) | 28(1) | 0(1)  | 5(1)   | 4(1)   |
| C(15) | 22(1) | 23(1) | 24(1) | -2(1) | -2(1)  | 1(1)   |
| C(16) | 18(1) | 29(1) | 30(1) | -5(1) | -3(1)  | -1(1)  |
| C(17) | 21(1) | 34(1) | 40(1) | 2(1)  | -2(1)  | -7(1)  |
| C(18) | 32(1) | 55(2) | 41(1) | 4(1)  | 8(1)   | -8(1)  |
| C(19) | 24(1) | 54(2) | 61(2) | 6(1)  | -5(1)  | -10(1) |
| C(20) | 45(2) | 31(1) | 54(2) | 6(1)  | -4(1)  | -6(1)  |
| C(21) | 26(1) | 33(1) | 35(1) | -5(1) | -3(1)  | 1(1)   |
| C(22) | 31(1) | 39(1) | 33(1) | -3(1) | -5(1)  | -2(1)  |
| C(23) | 41(2) | 58(2) | 41(1) | -5(1) | 0(1)   | 4(1)   |
| C(24) | 60(2) | 69(2) | 32(1) | -6(1) | 3(1)   | -2(2)  |
| C(25) | 66(2) | 57(2) | 34(1) | 4(1)  | -12(1) | -7(2)  |
| C(26) | 47(2) | 43(2) | 40(1) | 3(1)  | -13(1) | 2(1)   |
| C(27) | 33(1) | 33(1) | 34(1) | -1(1) | -7(1)  | -2(1)  |

|        |         |         |         |          |         |         |
|--------|---------|---------|---------|----------|---------|---------|
| C (28) | 27 (1)  | 31 (1)  | 35 (1)  | -3 (1)   | -10 (1) | -1 (1)  |
| C (29) | 19 (1)  | 26 (1)  | 24 (1)  | -3 (1)   | 0 (1)   | -1 (1)  |
| C (30) | 26 (1)  | 21 (1)  | 22 (1)  | -2 (1)   | 0 (1)   | 3 (1)   |
| C (31) | 23 (1)  | 34 (1)  | 31 (1)  | -1 (1)   | -4 (1)  | 6 (1)   |
| C (32) | 38 (2)  | 61 (2)  | 38 (1)  | 7 (1)    | -9 (1)  | 8 (1)   |
| C (33) | 28 (1)  | 49 (2)  | 70 (2)  | 9 (2)    | -17 (1) | -9 (1)  |
| C (34) | 35 (1)  | 61 (2)  | 61 (2)  | -22 (2)  | -4 (1)  | 20 (1)  |
| C (35) | 24 (1)  | 29 (1)  | 32 (1)  | -7 (1)   | -1 (1)  | 0 (1)   |
| C (36) | 31 (1)  | 35 (1)  | 33 (1)  | -7 (1)   | -3 (1)  | 1 (1)   |
| C (37) | 46 (2)  | 45 (2)  | 43 (1)  | -13 (1)  | -7 (1)  | -6 (1)  |
| C (38) | 55 (2)  | 60 (2)  | 45 (2)  | -20 (1)  | -17 (1) | -2 (2)  |
| C (39) | 54 (2)  | 67 (2)  | 29 (1)  | -10 (1)  | -8 (1)  | 11 (2)  |
| C (40) | 42 (2)  | 50 (2)  | 31 (1)  | 1 (1)    | -3 (1)  | 6 (1)   |
| C (41) | 30 (1)  | 38 (1)  | 26 (1)  | -3 (1)   | -2 (1)  | 2 (1)   |
| C (42) | 27 (1)  | 31 (1)  | 26 (1)  | -2 (1)   | 1 (1)   | 2 (1)   |
| C (43) | 18 (1)  | 25 (1)  | 25 (1)  | -2 (1)   | 0 (1)   | 1 (1)   |
| C (44) | 18 (1)  | 29 (1)  | 33 (1)  | -5 (1)   | 0 (1)   | -3 (1)  |
| C (45) | 23 (1)  | 39 (1)  | 41 (1)  | -4 (1)   | -10 (1) | -1 (1)  |
| C (46) | 36 (1)  | 38 (1)  | 58 (2)  | -2 (1)   | -13 (1) | 9 (1)   |
| C (47) | 53 (2)  | 54 (2)  | 32 (1)  | -3 (1)   | -15 (1) | 4 (1)   |
| C (48) | 28 (1)  | 54 (2)  | 76 (2)  | 3 (2)    | -19 (1) | -5 (1)  |
| C (49) | 26 (1)  | 35 (1)  | 43 (1)  | 0 (1)    | 2 (1)   | -6 (1)  |
| C (50) | 33 (1)  | 32 (1)  | 44 (1)  | 0 (1)    | -6 (1)  | -6 (1)  |
| C (51) | 38 (2)  | 41 (1)  | 56 (2)  | 7 (1)    | -7 (1)  | -11 (1) |
| C (52) | 54 (2)  | 34 (1)  | 69 (2)  | 5 (1)    | -17 (2) | -8 (1)  |
| C (53) | 56 (2)  | 33 (1)  | 68 (2)  | -9 (1)   | -15 (2) | 7 (1)   |
| C (54) | 43 (2)  | 41 (1)  | 48 (1)  | -7 (1)   | -4 (1)  | 5 (1)   |
| C (55) | 32 (1)  | 35 (1)  | 38 (1)  | -3 (1)   | -6 (1)  | 0 (1)   |
| C (56) | 27 (1)  | 33 (1)  | 32 (1)  | -3 (1)   | -1 (1)  | 0 (1)   |
| C (57) | 30 (1)  | 30 (1)  | 22 (1)  | 1 (1)    | 0 (1)   | 2 (1)   |
| C (58) | 36 (1)  | 34 (1)  | 18 (1)  | 1 (1)    | 1 (1)   | 2 (1)   |
| C (59) | 60 (2)  | 42 (1)  | 27 (1)  | -2 (1)   | 9 (1)   | -18 (1) |
| C (60) | 70 (2)  | 39 (1)  | 23 (1)  | -8 (1)   | 4 (1)   | -20 (1) |
| C (61) | 38 (1)  | 33 (1)  | 18 (1)  | -2 (1)   | 2 (1)   | 4 (1)   |
| C (62) | 36 (1)  | 36 (1)  | 24 (1)  | -4 (1)   | 5 (1)   | -7 (1)  |
| C (63) | 40 (1)  | 37 (1)  | 21 (1)  | -6 (1)   | 2 (1)   | -5 (1)  |
| C (64) | 35 (1)  | 31 (1)  | 21 (1)  | -3 (1)   | 0 (1)   | 2 (1)   |
| C (65) | 85 (3)  | 74 (2)  | 45 (2)  | -21 (2)  | -6 (2)  | 12 (2)  |
| C (66) | 122 (4) | 69 (3)  | 65 (3)  | -7 (2)   | -13 (3) | -7 (3)  |
| C (67) | 95 (4)  | 175 (7) | 74 (3)  | -34 (4)  | -8 (3)  | -13 (5) |
| C (68) | 79 (4)  | 224 (9) | 126 (5) | -105 (6) | -36 (4) | 52 (5)  |
| C (69) | 118 (4) | 64 (2)  | 106 (4) | -36 (3)  | -72 (4) | 41 (3)  |
| C (70) | 90 (3)  | 90 (3)  | 46 (2)  | 12 (2)   | -28 (2) | -21 (3) |
| C (71) | 160 (6) | 146 (5) | 66 (3)  | 9 (3)    | -26 (4) | -63 (5) |
| C (72) | 42 (2)  | 40 (2)  | 82 (2)  | -8 (2)   | -6 (2)  | 3 (1)   |
| C (73) | 51 (2)  | 58 (2)  | 79 (2)  | -26 (2)  | 3 (2)   | -1 (2)  |
| C (74) | 60 (2)  | 78 (2)  | 54 (2)  | -15 (2)  | -1 (2)  | -17 (2) |
| C (75) | 49 (2)  | 53 (2)  | 60 (2)  | 9 (2)    | -13 (2) | -5 (1)  |
| C (76) | 41 (2)  | 37 (1)  | 55 (2)  | -3 (1)   | -3 (1)  | -3 (1)  |
| C (77) | 36 (1)  | 33 (1)  | 58 (2)  | 4 (1)    | -3 (1)  | -7 (1)  |
| C (78) | 51 (2)  | 46 (2)  | 63 (2)  | 12 (2)   | -7 (2)  | -5 (1)  |
| C (79) | 63 (2)  | 67 (2)  | 65 (2)  | -5 (2)   | -4 (2)  | -22 (2) |
| C (80) | 87 (4)  | 95 (4)  | 157 (6) | -17 (4)  | 38 (4)  | -34 (3) |
| C (81) | 73 (3)  | 94 (4)  | 135 (5) | 42 (4)   | -5 (3)  | -23 (3) |
| C (82) | 78 (3)  | 103 (4) | 101 (4) | 38 (3)   | -4 (3)  | -10 (3) |
| C (83) | 99 (4)  | 119 (5) | 86 (3)  | 15 (3)   | -18 (3) | -36 (4) |
| C (84) | 82 (3)  | 81 (3)  | 71 (3)  | 4 (2)    | -7 (2)  | -38 (2) |
| C (85) | 140 (6) | 93 (4)  | 125 (5) | -12 (4)  | -22 (4) | -1 (4)  |



Table 5. Hydrogen coordinates ( $\times 10^4$ ) and isotropic displacement parameters ( $\text{\AA}^2 \times 10^3$ ) for joef086.

|        | x     | y     | z     | U(eq) |
|--------|-------|-------|-------|-------|
| H(2A)  | 5746  | 1940  | 1299  | 29    |
| H(4A)  | 5569  | 1415  | 2506  | 58    |
| H(4B)  | 6279  | 1740  | 2113  | 58    |
| H(4C)  | 6060  | 1020  | 2075  | 58    |
| H(5A)  | 3882  | 1029  | 2247  | 58    |
| H(5B)  | 4327  | 661   | 1789  | 58    |
| H(5C)  | 3477  | 1166  | 1707  | 58    |
| H(6A)  | 4245  | 2158  | 2338  | 65    |
| H(6B)  | 3844  | 2267  | 1793  | 65    |
| H(6C)  | 4935  | 2496  | 1943  | 65    |
| H(9A)  | 2241  | 1306  | -3    | 41    |
| H(10A) | 1558  | 2134  | -445  | 47    |
| H(11A) | 2097  | 3125  | -325  | 51    |
| H(12A) | 3383  | 3345  | 231   | 46    |
| H(16A) | 3346  | -37   | 323   | 31    |
| H(18A) | 2700  | -952  | 1309  | 64    |
| H(18B) | 2831  | -263  | 1116  | 64    |
| H(18C) | 3791  | -661  | 1259  | 64    |
| H(19A) | 1736  | -1250 | 595   | 69    |
| H(19B) | 2140  | -1122 | 53    | 69    |
| H(19C) | 1800  | -562  | 393   | 69    |
| H(20A) | 3329  | -1831 | 777   | 65    |
| H(20B) | 4381  | -1509 | 674   | 65    |
| H(20C) | 3671  | -1694 | 227   | 65    |
| H(23A) | 4978  | -1393 | -1445 | 56    |
| H(24A) | 4220  | -1138 | -2203 | 64    |
| H(25A) | 2917  | -455  | -2240 | 63    |
| H(26A) | 2292  | 19    | -1528 | 52    |
| H(30A) | 7577  | -1754 | 166   | 28    |
| H(32A) | 9892  | -1549 | 679   | 68    |
| H(32B) | 8966  | -2011 | 658   | 68    |
| H(32C) | 8798  | -1312 | 818   | 68    |
| H(33A) | 10209 | -814  | 33    | 73    |
| H(33B) | 9204  | -478  | 200   | 73    |
| H(33C) | 9368  | -655  | -362  | 73    |
| H(34A) | 10181 | -1929 | -177  | 78    |
| H(34B) | 9383  | -1787 | -598  | 78    |
| H(34C) | 9145  | -2294 | -190  | 78    |
| H(37A) | 5959  | -2781 | -1348 | 53    |
| H(38A) | 5957  | -2569 | -2196 | 64    |
| H(39A) | 6779  | -1727 | -2512 | 60    |
| H(40A) | 7610  | -1034 | -1989 | 49    |
| H(44A) | 9757  | 778   | 665   | 32    |
| H(46A) | 10617 | -271  | 1531  | 66    |
| H(46B) | 10399 | -161  | 962   | 66    |
| H(46C) | 9501  | -317  | 1327  | 66    |
| H(47A) | 9489  | 1121  | 1968  | 69    |
| H(47B) | 9916  | 472   | 2144  | 69    |
| H(47C) | 8839  | 512   | 1895  | 69    |
| H(48A) | 10943 | 1334  | 1450  | 79    |
| H(48B) | 11321 | 840   | 1058  | 79    |
| H(48C) | 11449 | 709   | 1631  | 79    |

|         |       |      |       |     |
|---------|-------|------|-------|-----|
| H (51A) | 10316 | 3130 | 379   | 54  |
| H (52A) | 9532  | 4023 | 676   | 63  |
| H (53A) | 8267  | 3963 | 1245  | 63  |
| H (54A) | 7755  | 3009 | 1567  | 53  |
| H (59A) | 6459  | 64   | -1566 | 51  |
| H (60A) | 6930  | 21   | -2390 | 53  |
| H (62A) | 8774  | 1478 | -2189 | 39  |
| H (63A) | 8296  | 1521 | -1361 | 39  |
| H (65A) | 5228  | 1612 | 3284  | 82  |
| H (66A) | 3893  | 1176 | 3685  | 103 |
| H (67A) | 2697  | 1793 | 4056  | 138 |
| H (68A) | 2905  | 2832 | 4070  | 171 |
| H (69A) | 4192  | 3276 | 3681  | 115 |
| H (71A) | 5591  | 3195 | 3119  | 186 |
| H (71B) | 5819  | 2544 | 2871  | 186 |
| H (71C) | 6308  | 2714 | 3388  | 186 |
| H (72A) | 4637  | 5222 | 1470  | 66  |
| H (73A) | 5026  | 5269 | 2292  | 75  |
| H (74A) | 5970  | 4511 | 2659  | 77  |
| H (75A) | 6509  | 3673 | 2194  | 65  |
| H (76A) | 6129  | 3616 | 1366  | 53  |
| H (78A) | 4448  | 4581 | 731   | 80  |
| H (78B) | 5055  | 3951 | 687   | 80  |
| H (78C) | 5612  | 4591 | 601   | 80  |
| H (79A) | 10396 | 3149 | 1767  | 78  |
| H (80A) | 11540 | 2334 | 1901  | 135 |
| H (81A) | 12236 | 2236 | 2743  | 121 |
| H (82A) | 11737 | 2951 | 3307  | 113 |
| H (83A) | 10601 | 3689 | 3157  | 121 |
| H (85A) | 9674  | 4089 | 2004  | 179 |
| H (85B) | 9859  | 4349 | 2544  | 179 |
| H (85C) | 9007  | 3848 | 2450  | 179 |

---

Table 6. Torsion angles [deg] for joe086.

---

|                                 |            |
|---------------------------------|------------|
| O(5) - Rh(1) - Rh(2) - O(10)    | 90.75(6)   |
| O(9) - Rh(1) - Rh(2) - O(10)    | 1.61(6)    |
| O(13) - Rh(1) - Rh(2) - O(10)   | -91.10(6)  |
| O(1) - Rh(1) - Rh(2) - O(10)    | 179.68(6)  |
| N(5) - Rh(1) - Rh(2) - O(10)    | -7.5(4)    |
| O(5) - Rh(1) - Rh(2) - O(2)     | -87.76(6)  |
| O(9) - Rh(1) - Rh(2) - O(2)     | -176.89(6) |
| O(13) - Rh(1) - Rh(2) - O(2)    | 90.39(6)   |
| O(1) - Rh(1) - Rh(2) - O(2)     | 1.17(6)    |
| N(5) - Rh(1) - Rh(2) - O(2)     | 174.0(4)   |
| O(5) - Rh(1) - Rh(2) - O(6)     | 1.09(6)    |
| O(9) - Rh(1) - Rh(2) - O(6)     | -88.04(6)  |
| O(13) - Rh(1) - Rh(2) - O(6)    | 179.24(6)  |
| O(1) - Rh(1) - Rh(2) - O(6)     | 90.02(6)   |
| N(5) - Rh(1) - Rh(2) - O(6)     | -97.2(4)   |
| O(5) - Rh(1) - Rh(2) - O(14)    | -178.38(6) |
| O(9) - Rh(1) - Rh(2) - O(14)    | 92.48(6)   |
| O(13) - Rh(1) - Rh(2) - O(14)   | -0.23(6)   |
| O(1) - Rh(1) - Rh(2) - O(14)    | -89.45(6)  |
| N(5) - Rh(1) - Rh(2) - O(14)    | 83.4(4)    |
| O(5) - Rh(1) - Rh(2) - N(6) #1  | -155.6(6)  |
| O(9) - Rh(1) - Rh(2) - N(6) #1  | 115.3(6)   |
| O(13) - Rh(1) - Rh(2) - N(6) #1 | 22.5(6)    |
| O(1) - Rh(1) - Rh(2) - N(6) #1  | -66.7(6)   |
| N(5) - Rh(1) - Rh(2) - N(6) #1  | 106.1(8)   |
| O(5) - Rh(1) - N(5) - C(57)     | -96.5(4)   |
|                                 |            |
| O(9) - Rh(1) - N(5) - C(57)     | -7.5(4)    |
| O(13) - Rh(1) - N(5) - C(57)    | 85.0(4)    |
| O(1) - Rh(1) - N(5) - C(57)     | 174.3(4)   |
| Rh(2) - Rh(1) - N(5) - C(57)    | 1.6(7)     |
| O(5) - Rh(1) - O(1) - C(1)      | 86.69(15)  |
| O(9) - Rh(1) - O(1) - C(1)      | 19.5(8)    |
| O(13) - Rh(1) - O(1) - C(1)     | -90.58(15) |
| N(5) - Rh(1) - O(1) - C(1)      | 178.35(15) |
| Rh(2) - Rh(1) - O(1) - C(1)     | -2.52(14)  |
| O(10) - Rh(2) - O(2) - C(1)     | -27.9(12)  |
| O(6) - Rh(2) - O(2) - C(1)      | -87.32(15) |
| O(14) - Rh(2) - O(2) - C(1)     | 87.73(15)  |
| N(6) #1 - Rh(2) - O(2) - C(1)   | 175.50(16) |
| Rh(1) - Rh(2) - O(2) - C(1)     | -0.23(15)  |
| O(9) - Rh(1) - O(5) - C(15)     | 87.79(15)  |
| O(13) - Rh(1) - O(5) - C(15)    | -33.2(11)  |
| O(1) - Rh(1) - O(5) - C(15)     | -87.44(15) |
| N(5) - Rh(1) - O(5) - C(15)     | 173.45(15) |
| Rh(2) - Rh(1) - O(5) - C(15)    | 0.19(14)   |
| O(10) - Rh(2) - O(6) - C(15)    | -91.31(15) |
| O(2) - Rh(2) - O(6) - C(15)     | 85.92(15)  |
| O(14) - Rh(2) - O(6) - C(15)    | 3.3(8)     |
| N(6) #1 - Rh(2) - O(6) - C(15)  | 175.42(15) |
| Rh(1) - Rh(2) - O(6) - C(15)    | -2.75(15)  |
| O(5) - Rh(1) - O(9) - C(29)     | -90.64(16) |
| O(13) - Rh(1) - O(9) - C(29)    | 86.47(16)  |
| O(1) - Rh(1) - O(9) - C(29)     | -23.4(8)   |
| N(5) - Rh(1) - O(9) - C(29)     | 177.48(16) |
| Rh(2) - Rh(1) - O(9) - C(29)    | -1.44(15)  |

|                          |             |
|--------------------------|-------------|
| O(2)-Rh(2)-O(10)-C(29)   | 25.4(12)    |
| O(6)-Rh(2)-O(10)-C(29)   | 84.74(16)   |
| O(14)-Rh(2)-O(10)-C(29)  | -90.29(16)  |
| N(6)#1-Rh(2)-O(10)-C(29) | -178.10(16) |
| Rh(1)-Rh(2)-O(10)-C(29)  | -2.33(15)   |
| O(5)-Rh(1)-O(13)-C(43)   | 32.4(11)    |
| O(9)-Rh(1)-O(13)-C(43)   | -88.59(15)  |
| O(1)-Rh(1)-O(13)-C(43)   | 86.55(15)   |
| N(5)-Rh(1)-O(13)-C(43)   | -174.32(15) |
| Rh(2)-Rh(1)-O(13)-C(43)  | -1.09(15)   |
| O(10)-Rh(2)-O(14)-C(43)  | 90.17(15)   |
| O(2)-Rh(2)-O(14)-C(43)   | -86.93(15)  |
| O(6)-Rh(2)-O(14)-C(43)   | -4.4(8)     |
| N(6)#1-Rh(2)-O(14)-C(43) | -176.56(16) |
| Rh(1)-Rh(2)-O(14)-C(43)  | 1.65(15)    |
| Rh(2)-O(2)-C(1)-O(1)     | -1.9(3)     |
| Rh(2)-O(2)-C(1)-C(2)     | -179.92(14) |
| Rh(1)-O(1)-C(1)-O(2)     | 3.3(3)      |
| Rh(1)-O(1)-C(1)-C(2)     | -178.62(13) |
| C(7)-N(1)-C(2)-C(1)      | 42.9(3)     |
| C(14)-N(1)-C(2)-C(1)     | -127.8(2)   |
| C(7)-N(1)-C(2)-C(3)      | -89.6(2)    |
| C(14)-N(1)-C(2)-C(3)     | 99.7(2)     |
| O(2)-C(1)-C(2)-N(1)      | -134.52(19) |
| O(1)-C(1)-C(2)-N(1)      | 47.2(2)     |
| O(2)-C(1)-C(2)-C(3)      | -5.0(3)     |
| O(1)-C(1)-C(2)-C(3)      | 176.69(19)  |
| N(1)-C(2)-C(3)-C(5)      | 65.0(3)     |
| C(1)-C(2)-C(3)-C(5)      | -61.8(3)    |
| N(1)-C(2)-C(3)-C(4)      | -171.6(2)   |
| C(1)-C(2)-C(3)-C(4)      | 61.5(3)     |
| N(1)-C(2)-C(3)-C(6)      | -55.2(3)    |
| C(1)-C(2)-C(3)-C(6)      | 177.9(2)    |
| C(14)-N(1)-C(7)-O(3)     | 177.8(2)    |
| C(2)-N(1)-C(7)-O(3)      | 6.2(4)      |
| C(14)-N(1)-C(7)-C(8)     | -2.5(2)     |
| C(2)-N(1)-C(7)-C(8)      | -174.03(19) |
| O(3)-C(7)-C(8)-C(9)      | -1.1(4)     |
| N(1)-C(7)-C(8)-C(9)      | 179.1(2)    |
| O(3)-C(7)-C(8)-C(13)     | 179.7(2)    |
| N(1)-C(7)-C(8)-C(13)     | -0.1(2)     |
| C(13)-C(8)-C(9)-C(10)    | -0.7(4)     |
| C(7)-C(8)-C(9)-C(10)     | -179.8(2)   |
| C(8)-C(9)-C(10)-C(11)    | 0.1(4)      |
| C(9)-C(10)-C(11)-C(12)   | 0.8(4)      |
| C(10)-C(11)-C(12)-C(13)  | -1.1(4)     |
| C(11)-C(12)-C(13)-C(8)   | 0.5(4)      |
| C(11)-C(12)-C(13)-C(14)  | 177.1(2)    |
| C(9)-C(8)-C(13)-C(12)    | 0.4(4)      |
| C(7)-C(8)-C(13)-C(12)    | 179.7(2)    |
| C(9)-C(8)-C(13)-C(14)    | -176.9(2)   |
| C(7)-C(8)-C(13)-C(14)    | 2.4(3)      |
| C(7)-N(1)-C(14)-O(4)     | -176.4(2)   |
| C(2)-N(1)-C(14)-O(4)     | -4.6(3)     |
| C(7)-N(1)-C(14)-C(13)    | 3.9(2)      |
| C(2)-N(1)-C(14)-C(13)    | 175.70(18)  |
| C(12)-C(13)-C(14)-O(4)   | -0.5(4)     |
| C(8)-C(13)-C(14)-O(4)    | 176.5(2)    |
| C(12)-C(13)-C(14)-N(1)   | 179.2(2)    |
| C(8)-C(13)-C(14)-N(1)    | -3.8(2)     |
| Rh(1)-O(5)-C(15)-O(6)    | -2.6(3)     |

|                         |             |
|-------------------------|-------------|
| Rh(1)-O(5)-C(15)-C(16)  | 173.63(13)  |
| Rh(2)-O(6)-C(15)-O(5)   | 4.0(3)      |
| Rh(2)-O(6)-C(15)-C(16)  | -172.12(14) |
| C(28)-N(2)-C(16)-C(15)  | -121.7(2)   |
| C(21)-N(2)-C(16)-C(15)  | 44.5(3)     |
| C(28)-N(2)-C(16)-C(17)  | 104.9(2)    |
| C(21)-N(2)-C(16)-C(17)  | -88.9(3)    |
| O(5)-C(15)-C(16)-N(2)   | 41.6(2)     |
| O(6)-C(15)-C(16)-N(2)   | -141.81(19) |
| O(5)-C(15)-C(16)-C(17)  | 172.63(19)  |
| O(6)-C(15)-C(16)-C(17)  | -10.8(3)    |
| N(2)-C(16)-C(17)-C(18)  | -169.5(2)   |
| C(15)-C(16)-C(17)-C(18) | 62.5(3)     |
| N(2)-C(16)-C(17)-C(20)  | 66.1(3)     |
| C(15)-C(16)-C(17)-C(20) | -61.9(3)    |
| N(2)-C(16)-C(17)-C(19)  | -53.2(3)    |
| C(15)-C(16)-C(17)-C(19) | 178.7(2)    |
| C(28)-N(2)-C(21)-O(7)   | 173.9(2)    |
| C(16)-N(2)-C(21)-O(7)   | 6.5(4)      |
|                         |             |
| C(28)-N(2)-C(21)-C(22)  | -6.1(3)     |
| C(16)-N(2)-C(21)-C(22)  | -173.5(2)   |
| O(7)-C(21)-C(22)-C(23)  | 5.3(5)      |
| N(2)-C(21)-C(22)-C(23)  | -174.7(3)   |
| O(7)-C(21)-C(22)-C(27)  | -177.0(3)   |
| N(2)-C(21)-C(22)-C(27)  | 3.0(3)      |
| C(27)-C(22)-C(23)-C(24) | 0.7(4)      |
| C(21)-C(22)-C(23)-C(24) | 178.2(3)    |
| C(22)-C(23)-C(24)-C(25) | -0.2(5)     |
| C(23)-C(24)-C(25)-C(26) | 0.0(5)      |
| C(24)-C(25)-C(26)-C(27) | -0.3(5)     |
| C(23)-C(22)-C(27)-C(26) | -1.0(4)     |
| C(21)-C(22)-C(27)-C(26) | -179.0(2)   |
| C(23)-C(22)-C(27)-C(28) | 178.9(3)    |
| C(21)-C(22)-C(27)-C(28) | 0.9(3)      |
| C(25)-C(26)-C(27)-C(22) | 0.8(4)      |
| C(25)-C(26)-C(27)-C(28) | -179.1(3)   |
| C(21)-N(2)-C(28)-O(8)   | -173.2(2)   |
| C(16)-N(2)-C(28)-O(8)   | -5.2(4)     |
| C(21)-N(2)-C(28)-C(27)  | 6.6(3)      |
| C(16)-N(2)-C(28)-C(27)  | 174.64(19)  |
| C(22)-C(27)-C(28)-O(8)  | 175.3(3)    |
| C(26)-C(27)-C(28)-O(8)  | -4.8(5)     |
| C(22)-C(27)-C(28)-N(2)  | -4.5(3)     |
| C(26)-C(27)-C(28)-N(2)  | 175.4(3)    |
| Rh(1)-O(9)-C(29)-O(10)  | 0.0(3)      |
| Rh(1)-O(9)-C(29)-C(30)  | -176.97(14) |
| Rh(2)-O(10)-C(29)-O(9)  | 2.0(3)      |
| Rh(2)-O(10)-C(29)-C(30) | 179.06(13)  |
| C(42)-N(3)-C(30)-C(29)  | 69.4(3)     |
| C(35)-N(3)-C(30)-C(29)  | -113.6(2)   |
| C(42)-N(3)-C(30)-C(31)  | -60.5(3)    |
| C(35)-N(3)-C(30)-C(31)  | 116.5(2)    |
| O(9)-C(29)-C(30)-N(3)   | -35.7(3)    |
| O(10)-C(29)-C(30)-N(3)  | 146.92(18)  |
| O(9)-C(29)-C(30)-C(31)  | 96.1(2)     |
| O(10)-C(29)-C(30)-C(31) | -81.2(2)    |
| N(3)-C(30)-C(31)-C(34)  | -37.7(3)    |
| C(29)-C(30)-C(31)-C(34) | -167.5(2)   |
| N(3)-C(30)-C(31)-C(32)  | -155.0(2)   |

|                         |             |
|-------------------------|-------------|
| C(29)-C(30)-C(31)-C(32) | 75.1(3)     |
| N(3)-C(30)-C(31)-C(33)  | 85.7(3)     |
| C(29)-C(30)-C(31)-C(33) | -44.1(3)    |
| C(42)-N(3)-C(35)-O(12)  | 178.8(2)    |
| C(30)-N(3)-C(35)-O(12)  | 1.3(3)      |
| C(42)-N(3)-C(35)-C(36)  | 0.1(3)      |
| C(30)-N(3)-C(35)-C(36)  | -177.44(19) |
| O(12)-C(35)-C(36)-C(41) | -178.1(3)   |
| N(3)-C(35)-C(36)-C(41)  | 0.6(3)      |
| O(12)-C(35)-C(36)-C(37) | 0.0(5)      |
| N(3)-C(35)-C(36)-C(37)  | 178.7(3)    |
| C(41)-C(36)-C(37)-C(38) | 0.1(4)      |
| C(35)-C(36)-C(37)-C(38) | -177.8(3)   |
| C(36)-C(37)-C(38)-C(39) | 0.7(5)      |
| C(37)-C(38)-C(39)-C(40) | -1.0(5)     |
| C(38)-C(39)-C(40)-C(41) | 0.4(4)      |
| C(37)-C(36)-C(41)-C(40) | -0.7(4)     |
| C(35)-C(36)-C(41)-C(40) | 177.6(2)    |
| C(37)-C(36)-C(41)-C(42) | -179.3(2)   |
| C(35)-C(36)-C(41)-C(42) | -1.0(3)     |
| C(39)-C(40)-C(41)-C(36) | 0.5(4)      |
| C(39)-C(40)-C(41)-C(42) | 178.7(3)    |
| C(35)-N(3)-C(42)-O(11)  | -179.0(2)   |
| C(30)-N(3)-C(42)-O(11)  | -1.8(4)     |
| C(35)-N(3)-C(42)-C(41)  | -0.7(2)     |
| C(30)-N(3)-C(42)-C(41)  | 176.5(2)    |
| C(36)-C(41)-C(42)-O(11) | 179.4(2)    |
| C(40)-C(41)-C(42)-O(11) | 0.9(4)      |
| C(36)-C(41)-C(42)-N(3)  | 1.0(3)      |
| C(40)-C(41)-C(42)-N(3)  | -177.4(3)   |
| Rh(2)-O(14)-C(43)-O(13) | -3.2(3)     |
| Rh(2)-O(14)-C(43)-C(44) | 178.68(14)  |
| Rh(1)-O(13)-C(43)-O(14) | 2.9(3)      |
| Rh(1)-O(13)-C(43)-C(44) | -178.83(13) |
| C(56)-N(4)-C(44)-C(43)  | 49.5(3)     |
| C(49)-N(4)-C(44)-C(43)  | -122.8(2)   |
| C(56)-N(4)-C(44)-C(45)  | -84.5(3)    |
| C(49)-N(4)-C(44)-C(45)  | 103.2(3)    |
| O(14)-C(43)-C(44)-N(4)  | -118.6(2)   |
| O(13)-C(43)-C(44)-N(4)  | 63.0(2)     |
| O(14)-C(43)-C(44)-C(45) | 12.8(3)     |
| O(13)-C(43)-C(44)-C(45) | -165.56(19) |
| N(4)-C(44)-C(45)-C(47)  | 63.5(3)     |
| C(43)-C(44)-C(45)-C(47) | -65.9(3)    |
| N(4)-C(44)-C(45)-C(46)  | -174.2(2)   |
| C(43)-C(44)-C(45)-C(46) | 56.4(3)     |
| N(4)-C(44)-C(45)-C(48)  | -57.4(3)    |
| C(43)-C(44)-C(45)-C(48) | 173.2(2)    |
| C(56)-N(4)-C(49)-O(15)  | -172.1(3)   |
| C(44)-N(4)-C(49)-O(15)  | 1.4(4)      |
| C(56)-N(4)-C(49)-C(50)  | 6.0(3)      |
| C(44)-N(4)-C(49)-C(50)  | 179.4(2)    |
| O(15)-C(49)-C(50)-C(55) | 174.4(3)    |
| N(4)-C(49)-C(50)-C(55)  | -3.4(3)     |
| O(15)-C(49)-C(50)-C(51) | -2.6(5)     |
| N(4)-C(49)-C(50)-C(51)  | 179.6(3)    |
| C(55)-C(50)-C(51)-C(52) | 0.3(4)      |
| C(49)-C(50)-C(51)-C(52) | 176.9(3)    |
| C(50)-C(51)-C(52)-C(53) | -0.7(5)     |
| C(51)-C(52)-C(53)-C(54) | 1.0(5)      |
| C(52)-C(53)-C(54)-C(55) | -0.8(5)     |

|                          |           |
|--------------------------|-----------|
| C(51)-C(50)-C(55)-C(54)  | -0.1(4)   |
| C(49)-C(50)-C(55)-C(54)  | -177.4(2) |
| C(51)-C(50)-C(55)-C(56)  | 177.2(2)  |
| C(49)-C(50)-C(55)-C(56)  | -0.1(3)   |
| C(53)-C(54)-C(55)-C(50)  | 0.3(4)    |
| C(53)-C(54)-C(55)-C(56)  | -176.3(3) |
| C(49)-N(4)-C(56)-O(16)   | 172.8(3)  |
| C(44)-N(4)-C(56)-O(16)   | -0.1(4)   |
| C(49)-N(4)-C(56)-C(55)   | -6.0(3)   |
|                          |           |
| C(44)-N(4)-C(56)-C(55)   | -179.0(2) |
| C(50)-C(55)-C(56)-O(16)  | -175.1(3) |
| C(54)-C(55)-C(56)-O(16)  | 1.9(5)    |
| C(50)-C(55)-C(56)-N(4)   | 3.7(3)    |
| C(54)-C(55)-C(56)-N(4)   | -179.3(3) |
| Rh(1)-N(5)-C(57)-C(58)   | 89(7)     |
| N(5)-C(57)-C(58)-C(63)   | 155(7)    |
| N(5)-C(57)-C(58)-C(59)   | -26(7)    |
| C(63)-C(58)-C(59)-C(60)  | -0.6(4)   |
| C(57)-C(58)-C(59)-C(60)  | 179.9(3)  |
| C(58)-C(59)-C(60)-C(61)  | 0.4(5)    |
| C(59)-C(60)-C(61)-C(62)  | 0.0(5)    |
| C(59)-C(60)-C(61)-C(64)  | 178.2(3)  |
| C(60)-C(61)-C(62)-C(63)  | 0.0(4)    |
| C(64)-C(61)-C(62)-C(63)  | -178.2(2) |
| C(59)-C(58)-C(63)-C(62)  | 0.6(4)    |
| C(57)-C(58)-C(63)-C(62)  | -180.0(2) |
| C(61)-C(62)-C(63)-C(58)  | -0.3(4)   |
| Rh(2)#2-N(6)-C(64)-C(61) | 4(4)      |
| C(60)-C(61)-C(64)-N(6)   | -11(4)    |
| C(62)-C(61)-C(64)-N(6)   | 167(4)    |
| C(70)-C(65)-C(66)-C(67)  | 0.6(7)    |
| C(65)-C(66)-C(67)-C(68)  | -2.2(8)   |
| C(66)-C(67)-C(68)-C(69)  | 2.3(9)    |
| C(67)-C(68)-C(69)-C(70)  | -0.8(9)   |
| C(66)-C(65)-C(70)-C(69)  | 0.8(6)    |
| C(66)-C(65)-C(70)-C(71)  | 179.5(4)  |
| C(68)-C(69)-C(70)-C(65)  | -0.7(7)   |
| C(68)-C(69)-C(70)-C(71)  | -179.3(5) |
| C(77)-C(72)-C(73)-C(74)  | 0.4(6)    |
| C(72)-C(73)-C(74)-C(75)  | -0.7(6)   |
| C(73)-C(74)-C(75)-C(76)  | 0.7(5)    |
| C(74)-C(75)-C(76)-C(77)  | -0.4(5)   |
| C(73)-C(72)-C(77)-C(76)  | -0.1(5)   |
| C(73)-C(72)-C(77)-C(78)  | -179.6(3) |
| C(75)-C(76)-C(77)-C(72)  | 0.1(4)    |
| C(75)-C(76)-C(77)-C(78)  | 179.7(3)  |
| C(84)-C(79)-C(80)-C(81)  | -0.4(6)   |
| C(79)-C(80)-C(81)-C(82)  | -0.5(7)   |
| C(80)-C(81)-C(82)-C(83)  | 1.8(8)    |
| C(81)-C(82)-C(83)-C(84)  | -2.2(9)   |
| C(80)-C(79)-C(84)-C(83)  | 0.2(7)    |
| C(80)-C(79)-C(84)-C(85)  | -179.1(5) |
| C(82)-C(83)-C(84)-C(79)  | 1.1(8)    |
| C(82)-C(83)-C(84)-C(85)  | -179.6(5) |

---

Symmetry transformations used to generate equivalent atoms:  
#1 -x+3/2, -y, z+1/2      #2 -x+3/2, -y, z-1/2
